# Supplementary material for: Genome-wide characterization and analysis of bHLH transcription factors in Panax ginseng
Source: PubMed Central journal article supplement — Acta Pharm Sin B. 2018 Apr 12;8(4):666–77. doi: 10.1016/j.apsb.2018.04.004 (PMC6089850; doi:10.1016/j.apsb.2018.04.004), 2018-04-12
Supplement: mmc1.pdf [file mmc1.pdf]

# Supplementary Information

## Genome-wide characterization and analysis of bHLH transcription factors in *Panax ginseng*

Chu Yang<sup>a</sup>, Xiao Shuiming<sup>a</sup>, Su He<sup>a,b</sup>, Liao Baosheng<sup>a</sup>, Zhang Jingjing<sup>a,c</sup>, Xu Jiang<sup>a,\*</sup>, Chen Shilin<sup>a,\*</sup>

<sup>a</sup>*Institute of Chinese Materia Medica, China Academy of Chinese Medical Sciences, Beijing 100700, China*

<sup>b</sup>*Guangdong Provincial Hospital of Chinese Medicine, Guangzhou 510006, China*

<sup>c</sup>*College of Pharmacy, Hubei University of Chinese Medicine, Wuhan 430065, China*

\*Corresponding author.

E-mail: [jxu@icmm.ac.cn](mailto:jxu@icmm.ac.cn) (Xu Jiang); [slchen@icmm.ac.cn](mailto:slchen@icmm.ac.cn) (Chen Shilin).

**Table S1** Amino acid sequences of 169 PGbHLHs.

| bHLH No | Amino acid sequence                                                                                                                                                                                                                                                                                                                                                                                                                                                                                                                     |
|---------|-----------------------------------------------------------------------------------------------------------------------------------------------------------------------------------------------------------------------------------------------------------------------------------------------------------------------------------------------------------------------------------------------------------------------------------------------------------------------------------------------------------------------------------------|
| PG00183 | MIVNQEMYEEGSACFDPIPMKDQTLGDQEQGLSYPQQDAATAAVAAANGAVA<br>AAMELELQQQMGEIDHNCYNPNNNMEAHLMQHPSLSSWETHHQEMNYNQY<br>HQIQEMHNNNTNRYPQSFMTDSCSLTETDPYPPTQDFLNLFHLPRCSSSLLPNS<br>SISFTNPTQKLGFGDFANASGSSVLYDPMFHLNLPPLHPLFREVFQSLPQKYN<br>FPGTITGSLSGGVVEIERSGEFDNEVLEFSKGMNCLAKEREGKDIKHFATERQRR<br>VHLNDKFNVLKELVPNPTKCNPKPDRASIVGDAIEYIKELQRTVNELKVLVEKK<br>RYSRERFRRHKAEDDSVLEVDSTNMKPHGDPDHPYNGSLLRSSWLQRKSKNTE<br>VDVRIIDDEVTIKMVQQRINCLLFVSKVLELQDLQHVAGGLVGFYSFLFNS<br>KIYEGSSVYASAIANKLIDLVDQRQYVASQPISCYRCMMLPKVVERLHGAFQFL<br>AIKSTH  |
| PG00883 | MSSRRRSRQSSSGGSRITDDQINDLVTKLQQLLPQITRDSARSDKVSSARVLQ<br>ETCNYIRSLHREVDDLSELSSELLANTDTNQAAMIRSLMQ                                                                                                                                                                                                                                                                                                                                                                                                                                       |
| PG00933 | MDDLVS SSSSSSLVSLSQESHPTTLQQRLEHILGSQPAADSWCYAIFWQTSTD<br>HNGRLLLSWGDGHFQGTTPPKHPPTNAKLERKKAIRGLFHALLNDNPDECS<br>IDTDEGGDVTDAEFYVTSLARTFPGGEYSEAFSSGTCVWLAGVDQLQLAKC<br>ERVREAQIHGIQTFVCIPTCYGVLEMGSNIALKQNWSLVQQANTLFGSDVSGFIS<br>DQKVPNTSNNNINVINNNGFLDGSNCFADIGVKMGTGSQEEESINLEAAKQESE<br>HSVSEFHEFVSAAGAKASVEKRAPKKRGRKPCGRDMAMNHVEAERQRREKL<br>NNRFYALRSVVPNVS RMDKASLLADAVSYINNLKAKVEELESQIQRESKKARVV<br>VVESAGDTTIDNNSSTTTCINDIRPSSNSNPVLEVEVKMVGPDALIRVQSQNCN<br>YPGAKLMEALRELELQLHHASMSRVDEL MVQDVVIRVSDGLRTEDALKAALLR<br>ALDH |
| PG01029 | MWWSPPVAVGSNCRKGFQILRELIPNSDQKRDTASFLEVIEYVQYLQEKVQKY<br>EGSYQGWSSEPTKMPWRNSHWRVQSFVGNPQAVKNDSGPGSTFSGRFDENNV<br>TIIPTMHTNPENPVESDL SRDASCKPMDQQPELANKGMVMPMPLQASMAVPVQ<br>GDGVFSLPLRRPVSDAQSTECPI TGDVLNQQDDL TIEGGTISISSVYSQGLLNTLT<br>QALESAGVDLSQATISVQVDLGKRANRGLNSGIILAKDHVDPSDSQPVGHFSEA                                                                                                                                                                                                                                         |

NNGEDTDQVQKRRKI

PG01277

MHGLGHPRVPTKSQPTTSHTKYTWDKPSAGGTLESIVDQATFFPDYKSAVDGSC  
GGGDDNVDELVPWFNNHRSIAVPPSATVTASATMVMMDALVPCTLNSNRNEGG  
GSMHVLDSGIGTRVESCSCGAAPFQTGKVAAAAVAHEWSSCRDQSVTESATFCSR  
QVTLDTCCEKGFVGGFTSTSLGSPGNISSGEQCTGDDHDSVCHSRPQKRRDKINQ  
RMKTLQKLVNSSKTDKASMLDEVIEYLKQLQAQVNMMSRMNMSPMMLPLA  
MQQQQLQMSMMAPMMGMGMGMGMGMGMGMGMGTVMMDMNAAMAGRPSITG  
MPPVLHPSAFMSPLTSWEGAGDRLHTPASVMHDPMSTFLAACQSQPMTMDAYS  
RMAALFQQLHQNSAPGAKNL

PG01478

MLSRVNSVVWMEARKDEETASWNNHNHNNNGGLENKDEMCSLSAYKSMLEV  
GEEDEWYLANNNITFSPTFTQADNNLLLPVDSSSSCSPTPASVFNNFDPQSVTY  
FLPPKPTNSINLNPLSSNPLENSFDLSYETGFLGNQALNSLCRGNRVLTGFNDLSS  
HTHMDSNLTSPHSTTTQLLQLAGNSGTMSAGFCSSGFQGFELGNGNSLFLNR  
SKLLKPLENFASIGAQPTLFQKRAALRKNLADSGGNLGLLGNVEGYDGKREVG  
ASDKKRKTSYGDDLDNVFDGPGSNYDSDEFTENNKGEDSGKNNGSNANST  
VTGGNQKGGKGLPAKNLMAERRRRKKNLNDRLYMLRSVVPKISKMDRASILG  
DAIEYLKELLQKISDLHNELESTPSSSLTPSTSFYPLTPTPPTLPGRIKEELCPSSLP  
SPTGQPARVEVRLREGRAVNIHMFCGRKPGLLLSTMRALDNLGLDIQQA VISC  
NGFALDIFRAEQCKEGQDVHPDQIKAVLLDSAGFNGMV

PG01763

MANNPEGYSDDFLEQILAIPTYGLAGTDGSSSETTPTASHLASGGGVGIQPPF  
FPLGLSLDNGQRERGSMYMGSLFPVFEHLQPHSVRHSVPQIHQAFQSOTTTSTAV  
TVPHPPNMRPRVRARRGQATDPHSIAERLRRERIAERMALQELVPCNKSDKA  
AMLDEILDYVKFLRLQVKVLSMSRLGGAGAVAQLVADIPLQSVEGGISENGNDR  
PIWENWSNDDTEQEVAKLMEEDVGAAMQFLQSKALCIMPISLAALYPTNQPDI  
STLVKPEPPAPSFESY

PG01888

MDPPAIMNHGAFRSGNAAPNNLAEIWPFGQSLGQFTENPNREDDPMVLDQR  
GERKRRQDDDSIIGVSTSSAANGTSDSDIKRLKASGRDEELESKVETEAINSGKQ  
ADQSTNP AEPTKQDYIHVRARRGQATDSHSLAERARREKISERMKILQDLVPGC  
NMVIGKALVLDEIINYIQLQQQVEFLSMKLEAVNSRTGPSIEGFPSKDYGQQT

DMAGVTFGSQAPREFSRDPSPEWLHMQIGGNFERSA

PG02200

MDQQQQQMNSGLTRYRSAPSSYFANLINSTGYGGDDCDEFLNPRSSSPESDQFF  
SRFMSSCGSEESNSPNLCDIGRNSLVNEPVQAQFVASMKEPEVLNPQQQQQQ  
QQQQMVYLSQSQLDHPVGSNLGMDSSYNVSNMGMMDRLPQMKMGSGSGSN  
SNLIRHSSSPAGLFANINIDNGYAVMRGMGNFGAGSGTNAEASFSSGSRLKNQID  
FPPGPSSGIMPHASEIGGKSMGMGSPESSEFGEARRNDGGYMTGGFPSTSWDD  
TLLSDNFLKGLAENQSGEGGTRTPTVLAHHLSTSSAELSAMEKLLQFQDSVPL  
KIRAKRGCATHPRSAERVRRTRISERMRLQELVPNMDKQTNTADMLDLAVD  
YIKDLQKQVKILSDTRAKCTCPNNQKT

PG02335

MNKVRILFNFAIESGSWPLSPDPNEPDPSALWLTDPVPVPSVEIKEIPWNSNSKP  
PQIMFENHSSSTLTENPSTSSVINVHNQHLNQQNGVLHRELNFSGFGFDGISSTNV  
RNGNLNSHACKPESGEILNFGESKRSSCSGNGNLFSGNPFGGIVEDNKKKSPN  
SRGSHEEGMLSFSSGVILPSSGVVKSSGGGSDHSDLEASVVKEVESSRVVDPE  
KKPRKRGRKPANGREEPLNHVEAERQRREKLNQRFYALRAVVPNVSKMDKASL  
LGDAYSINELKSKLQESDSEKDELRSQLDSLRLKELAKKVSQYPTQATQAAVEQ  
DLKMSNHGSKLLDLIDVKIIGWDAMIRFQSTKKNHPAARLMAALKELDLDV  
HHASVSVVNDLMIQQATVKMVSRYFTQDQLRVALTARVSETR

PG02475

MDPPAIMNRSAFRSGNAAPYNLAEIWPFFHGQNLGEFNDNPNREDDPMVLDQR  
GERKRSQDDSAAGASTSCAADDMSDSDSKRLKVSVSRDENIASKAETEANS  
KQAEQSRKPSEPPKQDYIHVRARRGQATDSSHSLAERARREKISERMKILQDLVPG  
CNKVIGKALVLDEIINYIQLRQVQKFLSMKLEAVNSRTNPSIEGFSSKDFGQQTF  
DMAGLTFGSQAPREFSRGSSPEWLHMQIGGNFERST

PG02883

MEKEYFFNTEFPPQLHFQPSLSALQMPNGFHNPNFDKLMQYSQFESALSSMVT  
SPAASNSATDTFAIRELKGKLGITIFNTGEISPEFLQGVSYIGGGNNSPSSCYNTPT  
DSPPQLHLPIMSHFVKEDLPNLGNPIMNSALPALSADPGFAERA AKFSCFGSRSF  
NGRTSQIGLNNAEFQYRSSLMLMGNGKLPVSSSPFLKEAGSPMGIQVKNKCVQ  
TQMEMRSGNGSASASGRKFSNLGSAANSNEASSVSEQNPSGENSLGTPKELNY  
RKRKGVSRGKAKEAALSQSANAKKEAEGDDNLNVKRSKMTGGGGSVKTEET  
KIGAEEDQKQANNDQKTPEPPTDYIHVRARRGQATDSSHSLAERVRREKISERMK

LLQDLVPGCNKVTGKAVMLDEIINYVESLQRQVEFLSMKLATVNPRMCSRLLSK  
DIIFQPNGTFPNQMCQVNSSSASAYYGHQAQGGQIPQVYKSVEPLLDATLCRNL  
GMHLDFGEGLSQFPASEDDHCSNGFW

PG02930 MDWYSCNSKKWDFGFGHFGLVEQFWGSLGGNLGSGSMLNSHTLVLDGEKGEL  
VKAPGGVEKKDGVLEVKDVAALKSHSEAERRRRERIKAHLDTLRGLVPCAGKM  
DKATLLAEVICQVKQLKNSATEASKGVLIPMDADEVRVEPLDESSRDGTYFLAS  
LCCDYNPELLSDVKKALNALQLNIVKAEISTLGKRVKNVVFVFTSGRGNNGNAEEQ  
QLLLNSVRQALSSIVDKISVCMEYSPRTLLPNKRRRISFFESSSSSS

PG03153 MDPPIINETSFSAAANPSSYTLAEIWPFPINGTDSPGTASGGGGGGLGLRMSGFGET  
TTNPDVSIESTVTDQSWSRGAGKKRRDVNSEDGSSKLFSANINNANDLNDSSG  
KRLKVMGSNEEHGGSKAEVEASSGSGNKSTEQVKDYIHVRARRGQATDSHSLA  
ERVNFFKAFPNCNLLVFLFMHPILLHARREKISERMKILQDLVPGCNKVIGKALIL  
DEIINYIQLQRQVEFLSMKLEAVNSRMDPTIEGFPTKNLGVPTFDATGMIFGSQA  
PRGEYAQASQPDWLHMQVGSSLERAT

PG03239 MDPPIINETSFSAAANPSSYTLAEIWPFSINGTDSPGTAGGGGLGLRMSGFGETTTNP  
DVSIEESTVTDQSWSRGAGKKRRDVNSEDGSPKLVSANINNANDSNDLSGKRLK  
VMGSNEEHGGSKAEVEASSGSGNKSTEQVKDYIHVRARRGQATDSHSLAERVN  
FFKAFPTCNLLARREKISERMKILQDLVPGCNKVIGKALILDEIINYIQLQRQVEF  
LSMKLEAVNSRMDPTIEGFPTKNLGVPTFDATGMIFGSQAPREYAQALQPDWLH  
MQVGSSFERAT

PG03489 MAMEDNQILHDQNKPLPLGTTLPNSYPLQDHHHSSSLNQLPSSDFIRQRGEN  
HNNHRIQAEQERQEDQEEELGAMKEMMFKIAAMQPVDIDPSTIRKPKRRNVRS  
DDPQSVAARHRRERISEKIRILQRLVPGGTKMDTASMLEEAGRYIKFLKRQIRQL  
EDNHQPQCIGVMSNFPVTPNKALVGSTGSFSMEPVAQTTYTAAGHEHNDLKNS  
NDTRNVRGIGIITTEAHPDQMFTIVLSNNLQSLSRFNDTSDIESKTGGGSKLPMCN  
KDKFAN

PG04363 MVEKFWVKEEDKALVEGVLGNEAFEYLVWSASNNVLSEFVAPAGDLGLQOGL  
CKIIEGSNWTYAVFWQVCSSKSGKSALVWGDGHYRESKGGEAEDRKS KGDNK  
KQVLDKLHACFRGSGEDNFAAKFDSVSDVEMFYLTSMYYSFPPDKPSSPSQSFN

SNPFELQITGTNQVYGNSSNGHRSNDSSEKLFPMNQVILGGLNSQALVSNLEQ  
GKDDSLQADERKPRKRGRKPANGREEPLNHVEAERQRREKLNQRFYALRAVV  
PNISKMDKASLLGDAISYITDLQSKIRILETEKDEVNNNQKQCAIPEIEFHHTTQENA  
VVRVSCPLDTHPVSGVIKTLREHDVITHDSSVSTTDNGEIVHTFSIRTQGGSAEKL  
KEELSTALSG

PG04535 MERTDSSGIPMGHVDDDDYNLVDFMDEANFEHFIALVRGESADPIVKFCPNYLDC  
DHINDCSVDNQFVPTRGPLYDQFNPPINTFSDPINPLLFDSLPCDLKEGEEENDTE  
EYSSATINTTPPPPPNTNTTTSTKKSTKGDRSRTLISERRRRDRMKEKLYALRAL  
VPNITKMDKASIVGDAALYVQELMQAKKLRAEIASLESSLTGVDKQGGGLYD  
NVNNKIQSKNIHPTSKKISQIDVFQVEEKGFYARVVCNKGQGVAAASLHRALDSFS  
SFIVQSSNLATADKNFVLTFTLNVREEMDMNLPNLKLWVAGALLNQGFDF

PG04685 MQPCSREMAMNSILNHQQQQSQMANSLHQQDPQQQIIQSHGFDPSSHDDF  
LDQMLSSLPSCTWPPSDLSSSAQNPNKSLPWEPNLNMCPSPFDDQSVMLASKL  
RHHQISGGGPTSPAQVLMMLQQQLMLSRGLSGGLPSPTGDSGAGDSGLLPLPPSL  
SSDDTIDGSSFKSLNPGGDGSVQALYNGFAGSLHASSQTSNQAQHFHHPQGGT  
MQAQNYRTPVGGMNQAPASGGSGGGAAAQPRQVRARRGQATDPHSIAERLR  
RERIADRMKSLQELVPNANKTDKASMLDEIIDYVKFLQLQVKVLSMSRLGGAA  
AVAPVVADISSEGGDCIQPNATAAGGAGGVGRPSNGTQTAASSSSNNNDSMT  
VTEHQVAKLMEEDMGSAMQYLQGGKGLCLMPISLATAIATACHRSPSTRSHLNN  
TLLPGGPTSPNLSVLSVQSATMGNVIADSSVSKP

PG04790 MADLYGNNGHRSSSLESEEMSSFLHNLLQNSAGTPPYFFKEKQNSDFADPGGF  
FPAEAKDSTVNPFCVGSNSDQITSSRRNLPYNSNDADEFDFGCEEPEEPEVPANS  
VPPRSSKRTRAAEIHNLSEKRRRSRINEKALKALQNLIPNSNKTDKASMLDEAIEYL  
KQLQLVQMLTMRNGLGLNPVYLPETLQPVQLTQRGVNYDEGNVLMTANRRD  
TVSTDPKFSARPLYMSNPAPRIVIPSITNINNSSETS YGLEPSIPESI

PG05026 MEEFGGSSSSSPVLLSQQKHVPTLQQRLQYILESQPDCWSYVIYWQTSKSDSN  
GSLLSWGDGHFRGATKHNTLRKDQTNHTIDGFIDSDVMDAEWFYIMSLTRIFR  
AGDGSVPGKVLISGAHIWVCGTDQLHVAECERAKEAQVHGFQTFVCIPTCSGVL  
EMSSDITISENWSLVQQAKSLFGSDLIDLIPKQPNPSNVGSCSYLDMEMFDFDLH

DQFVAVGP GTPHVEKKNAAKKRGRKPILGQDMPVNHVEAERQRREKLNNRFY  
ALRAAVPNVSRMDKASVLADAVSYINELKVKVDELESQLEFRALKKSGKAES  
AGDDTVENPNNTTTTSVDQKMGKSTPLVDVEVKMVGSDAMNIRIQSDNSDYPG  
TKLMIAIRELELHVHHASMSNVNELIMLQDVVVKVPAADSDGGLRSEGLRSAL  
LRALMEH

PG05306 MSKCPKWINLITTPRDNQFNPYQSSINDQTPLDYIPITEAEPKECNVARKVQKAD  
REKLRRDRLNEQFMELGNTLDPDRPKNDKASILGDTIQVLKDLAQNRLKAEY  
ASLTEESRELTQEKNDLKEEKASLKFDIDNLNLQYQQRARAMFPWGGVDHSVV  
MHPPSYYPVPMPIPPGPIPMHPSLQYPFFGNQNPALVPNPCSTFVYPYLTNTIIE  
QQSAHYVSPVPPSSRSVSSKQDSRNRSSDQGKSKTDKYEDSNDVATELELKT  
PGSTADQDSSLGQRKYKSLRKESLSDGNSSSRCSSTHTVQASSSDSVVGGGM  
RAEDTERGQI

PG05437 MGCKIGEIELGMSIDAQVDMEMEMRNWFPEDFSQQALPRELPQPTDQNLSSSS  
SSLRSVSIDSPEGAPFLYNITSTS YIPQPIEPSTLQLAMPPLTPITNPFQEIQTLS  
QIRNAQFPTIESEDAAMTRAILAVISSTSPTSSTSSHQPQKSSAFKSYISSFSPRSQI  
TSRVIQKQNM LKRAIAFIRNSSLLMRSQEQMQTG NRPM SNQLQH MISERKRREK  
LNE SFQALRSLPPGSKKDKASVLSSTMEYLN SLKAEVEELTKRNQILEEAQLVV  
RQNETTIISDGSSTERLQVRITNIVETTFDARILDLRVILRGESSLLDLAIRVLEFL  
KTLGNVTVLSVEGDPSSVSQLVWRLKIEVDGWDNL

PG05942 MFGDSRALFTDSNAIFSSNSNPKGEDMLTKSRMNFDMNNNSSIQDYKQYQNNQ  
TNSGLLRFRSAPSSLLANFDNGVDKSGDSNEDLMAESFKGLDDNKTL PNGFAVN  
SQLPPHYPRHSSNLELGTQVGAVDNSSSYRMGSSMG MENQAKMVSSLMRQNSS  
PAGLFSHLNSQTGTVQYRSLFSVKTEVLNISKQFSGYAAMRGGVGN YRLGNGSN  
GDISPTASRLKSQMSFSSGLPSSLGMLSRISEIEGENIGATGNDDAKNGSGNGDTQ  
FYTSEFPLSSWSDSLHFAENFTGLKRELDDEKLFSGAQNTDLANRPPLSSHLS  
LPKNSSEMTAMDKLLQFQDSVPCKIRAKRGCATHPRSAERVRTRISERM RKL  
QELVPHMDKQTNTADMLDLAVEYIKDLQKQFKVSHNKINSKTWYTF

PG06292 MALESVVFQQDPFTSYGCKDFYAMEDIGGGYFSNFDHEQKKKVHDHGCSFNEN  
TNTNTNNNNNNNNNNNNNNNNNNNNWKNYSPPPSMMQTNSSSPDEVCTGITGHGFF

TGAYPPPAAPPVTPRRKRSIKSTKNKEEVENQRMTHIAVERNRRKQMNDYLA  
VLRSMPPSYAQRGDQASIVGGAINYVKELEQLLQLEARKQVKHDQSNDD  
NDHDSTLFFANFFTFPQYSTRPTSHKSSVAPELMDETQSTAADIEVTMVESHANIKI  
LAKRQPKQLFKMVSGFQSIGLLILHLNITTVDHRVLYSFNLKVEDDCQLTTVNEI  
ATAVHEMVIMIQEEAIFC

PG06381 MANNPEGYSDDFLEQILAIPSYTGLAGADGSSSETTPLTAAQLNSGAGIQPFF  
PLGLSLDNGQRERGSNMGSLFPVFEHLQPHSVRHTVPQIHQTFQGQTTTSTTV  
TVPHPPNMRPRVRARRGQATDPHSIAERLRERERIAERMRALQELVPSCNKPHSV  
RHTVPQIHQLFVAYWPLSISIPIPHPEFTFLYLDYQIMTFQGQTTTSTTVTVPHPPN  
MRPRVRARRGQATDPHSIAERLRERERIAERMRALQELVPSCNKTDKAAMLDEIL  
DYVKFLRLQVKVLSMSRLGGAGAVAQLVADIPLQSVEGGMSSENGNNQPIWEN  
WSNDDTEREVAKLMEEDVGAAMQFLQSKALCIMPISLAALIYPTNPDISTLVK  
PEPPAPS

PG06438 MEELLASSSSSSSLVSLTSQEYPPPLPLPLSSTTLQHRLQYL VETQPADHSWS  
Y AIFWQASSNDQLVLSWGDGHLRGTTKNTPVPLKESKPKVRGLFLHALLNDNP  
DASIVDSVTDQAQWFYVSSMARTFPGNSSFGGVPWKAFSSGAHIWLSGPDQLGS  
FECERAQEAQIHGIKTLVCIPTSSGVVEMGSTVPLKENWNLVQQAKSLFGSDLA  
GLIYKKYVDDPSNNNMNGFEFDRSICFSDINGLFTSLQDQEDSINLLDAKLLDSE  
HSDSEFQFAAASAAGGVATSIEKRAPKKRGRKPCGRDTPANHVEAERQRREKL  
NNRFYALRSVVPNVSMDKASLLADAVSYINDLKIKVEELESQIQNESKKLKVE  
AAAAAAGAASTDTADNNNSTTTSDQATPNSNTTSVPLEIEVKMVGPDAMIRV  
QSENSNYPGAKLMEALRELELQVHHASMSSVKELMLQDVVIRVPDALRTEDAL  
KAALLRVIITHMRSRSSVPN

PG06642 MSLVSLGRVSEIAPFRGFVGLLGFSGSKLQVQKLTMGTEDNGDMRFQQRDGDGT  
MNRNPLSEKVAEMGMRSIFSIFKGSNGAESYFGSGWDPLVLSQSENFGAHNGFS  
NPAYPVVMENQVMSTTSHLVHYQSDSGGLGEMVPKLSCFGSGSFSEMVNSFGL  
SECGQMSYSQNKEGGTGKALLIGTDSQEECRNSEGKVS PNGKKKRRTSESRS PF  
NPNKNTEVEQEDPSGDSLEQDDKKQKIEQNVNANLRGKQTSKQAKENS DSGD  
AVKDNYIHVRAKRGQATNSHSLAERVRRERISERMRLQELVPGCNKITGKAV



MLDEIINYVQSLQQQVEFLSMKLATVNPENIDIDQILSKDILNSRGSNATILGFPG  
LRPAHPFPQGSPLGIPSTTPPFHSMPTVWDNELQNLQMGFDSNNNLGPTEGKT  
EDLIDKDDCFY

PG06701 MALEQPQPEEEGVADISRKKLALAVKSIQWSYAIFWSISSKQPGVLEWSDGYYN  
GDIKTRKTVQAVQVDADQLGLHRTDQLRELYESLTAETNPQSTRPSAALSPED  
LTDTEWYFLICMSFEFNIGQGVLWSDGYNGDIKTRKTVQAVQVDADQLGLH  
RTDQLRELYESLTAETNPQSTRPSAALSPEDLTDTEWYFLICMSFEFNIGQGLPG  
RTLANNETIWLRNAHYADSKVFNRSLAKTVVCFPYSVGVIELGTTKLVSIEDPNI  
IQHITTSYLETPSTIVSKNYKYVSEATRNEKDTDHVELDQDVLDTNLNPEIEWEE  
VNTCSMSNNISEGFEPNHQVQKSLMVEGINGGASQVQSWQLMEDEISNGVLNS  
VSSDCISQTFVSPEKLVPLPNEEKGNDDRLPDLENCKDAELTSDEIRNDDIQYQS  
IVSTILKSSHQLILGPPFQSSIKDSSFVRWNNNRLFCCQKSRSGGASQRLKVVY  
EVAKMHSGCLESRENNGSGGELRKPEAETDANHVLAERRRRAKMHEKFVIL  
GSMVPSTGKVDKVSLLHDTIEYLKNLKNRVEELESQKEVQDIEARRRMKPRDV  
VERTSDNYGAKRIRNSKRRVMNKRKASDVNETEAVNRVQPEDNFTDDVTVSKI  
EKNVLIEVKCPWREDLLEIIDAISNLQLDSHSVQSSNIDGNLSLTVKSKVKGSTM  
TSVKMIRQAIQRVTRKC

PG06793 MPLSEFYRMAKKGKVEGSQQKATTCSTDFVPDSEIVELVWENGQVMMQGSRS  
RKTPKIPTSNSYNFQTDREFRDKDTASQTTSKPGKYGTIDSIYSDIATSIPSGETGLS  
QDDDMVPWFNYPIEDTLQDYCPDFLPELSSVTVNEPSNRNSFASMEKRDRTNQ  
IVRDSHNVSVHNGLSLQSNVSKLPSTSSAQLYPWSPQGKTSVPSGISSVSDIIST  
NTNNIHHDVSGNLVPAQPPVGLFSLKMQKQDSELPRSNSLLNFSHFSRPAAM  
ARSSIQNASNVSASGSLGTRMGETDKVPAICKNPAESRHLDPNCVLPKEMNF  
HTQPNLVSAAYVDLKPLETKPVEESHPRQSDFREDGRKNDKSPNQDHGGNT  
ANGVPDNEKTAEHVGASSVCSGNSVERASNDPTVNLKRKNCRYTEESEQSED  
VEEESVGVKKAAPARGGSGSKRSRAAEVHNLSERRRRDRINEKMALQELIPNC  
NKVDKASMLDEAIEYLKTLQVQIMSMGAGLYMPPMVAGGWKHIHAHLPH  
FSPMSVGMGMGMGMGMGMGMNMLDMNGGVRGCSMIPMPMQRAHFSPSPIS  
GSTSFQGMAGANLQVFGHPSQGVPM SVAGAPLVPLSGRPINSATGMSALRMGV



MQSS

PG07174

MNHLDYLYELKSSYSHESYSTYPTSNPQSLPLDNMMSNIGIESLKTEYDSSFYSK  
QMISTSNASTSNSTNFIAFGYPNSVPPLEQHGFYASLNLPKSKDELVPQEIFKFS  
HKMQSQLSYNKNYASEFGEEIKRIDSSINRSPLQAQEHVIAERLRREKLNKLFIAL  
SAHILGLKKPYIWSLKKKLHHLFSVSEYDVLLQLDKASILKDAVEYIKQLQEREK  
VLEEEACKQSEEPVTKKKTLMLSEDGDDTHSPQLPPLSDIKARVRGQNVLIRIHC  
QRPKGSSIVLKFLDELEKIHLTIINCCVIPFDNSLDITITAQIDAKFCITTYELVEEV  
RSAFSKLV

PG07175

MEMSVVRWNSQQATADECNFMNHFELNSLGFDAALDELTAEQYLVSSEETFQ  
KSSLSPCYTSFLAMDQENKINHSMTTDISGHGFERPTKQIKTNTWNSKQHNL  
AKDHSSSPSSHLISFANFSSQPTDSRTASCVDLVSFVLPVCKDELLTYEDLTQTY  
NLDDRNIICSSKGGQGTKRSATTTILSRTPSHAQDHVIAERKRRLTERFIALSAI  
VPGLKLDKASVLGDAIKYMKHLQERVKLLDEQIKKKKPEVSFVSLNSCHLPDY  
DDHSSSDVNSSGCLNKALPEIARVSEKNVLRHCEKQKGFIPKMLSEIEKLH  
LMVINTNVLPFGDYAIDVTVVAQMDDEFSTVKDLVRNIRSALH

PG07247

MELELQQMGFEIDHNCYNPNNNMEAHLMQHPSLSSWETHHQMNYNQYHQI  
QEMHNNNTNRYPQSFMNTDSCSLTETDPYPPTQDFLNLFHLPRCSSLLQNSSISF  
TNPTQKLGFGDFANASGSSVLYDPMFHLNLPLPPLFREVDQSLPQKYNFPGT  
ITGSLGGVEEIERSGEFDNEVWEFSKGMNCLAKEREGKDTKHFATERQRRVHL  
NDKFNVLKELVPNPTKCNPKPDRASIVGDAIEYIKELQRTVNELKVLVEKKRYSR  
ERFRRHKAEDDSVLEVEITNMKPHGDPDQPYNGSLLRSSLWQRKSKNTEVDVRI  
IDDEVTIKMOVQKRINCLLFVSKVLDELQLDLQHVAGGLVGDFYSFLNSKIYEG  
SSVYASAIANKLIDVVDRQYVASQPSNSY

PG07364

MEEFGGSSSSSSPVSALSQKHVPTLQQRLQYIVESQPDCWSYVIYWQTSKSDSN  
GSLLLSWGDGHFRCATKHNTFRKDQTNHTIDGSIDGDVMDAEWFYVMSLTRIF  
RAGDGSVPKVLSSGAHIWVCATDQLHVAECERAKEAQLHGFQTFVCIPTCSGV  
LEMSSDITISENWSLVQQAksLFGSDLIDLIPKQPNPSNIGSCSYLDMEIFDFDLHD  
QFVAVGPGTPHVEKKNAAKKRGRKPILGQDMPVNHVEAERQRREKLNRFYA  
LRAAVPNVSRMDKASVLADAVSYINELKVKVDELESQLEFRASKKSGKAESA

GDDTVENPNSTTTTSVDQKMAESTPLVDVEVKMVGSDAMNIRIQSDNSDYPGT  
KLMIAIRELELHVHHASMSNVNELIMLQDVVIVKVPAAAADSDGGLRSEEGLRSA  
LLRAMEH

PG07462 MFSLNQTDELVFQIHPSIPEQQQEEALVTQDLTLPDQAYGACTVPTTNANNTKR  
HRKKSLLNTATGDNNNIIDESGKKVMHREIERLRRQEMGKLYGSLRNLIPLFIK  
GKRSISDHMHQAVNYINHLQGSIKELDMKRNKLIKMPVKSVISPAGRSGSSSN  
NCFRENSIVTVSPCWCGVEILISIGLMMEEGFHLSRAMEILVNEEGLNVISYAST  
RANQRLHTIQSQLRTFATDPTCIDMSALQQKLNVDVCLPMHEIDELGANRMPY  
VPGHDLVIFRKAKSSLASPSITHI

PG07481 MGGTMWSEEDKAMAAAVLGTRAFDYLISSVSAECSLMAVGNDENLQNKLS  
LVDCPNFSNFSWNYAIFWQISRKSGDLVLGWGDGSCRELREGESEVSQILNLR  
FEDENQQRMKRVLQKLHSLFGGSDEECYAFGLDRVTDTEMFFLVSMYFSFPR  
GEGAPGKCFGSGKHVWLSDALKSSTDYCFRSFLAKSAGIQTFVLIPTDVGVEL  
GSMRSIPESLELVQSITSSFSSFLSASKPKLMAAAPVVSEDGNTQFSNLDVVEGPR  
ITKIFGQDFNSTRSQFREKLAVRKAERPWDACSNGNRSPFPNARNGLNGSNWA  
QFNNVKQGDTVETYSPTANNHELLNGGAREEFRFNNFKTQKPAQMIDFT  
GAMTRPAVISRPASGESEHSDVEVACKDGQMGLLADAKRPRKRGRKPANGREE  
PLNHVEAERQRREKLNQRFYALRAVVPNISKMDKASLLGDAIAYITELQKKVKD  
LESGREKIGSTSREASSSDANPNSEYKNQVSNIEVEAAAHDEVTVRVTCPDLSHP  
VSRVIEAFREAQVTVTESKLTAGNDTVFHTFVIKSEGPEQLTKEKLVAAFSREAS  
SLQPLSSVG

PG07666 AALPGSFGVDYSLDHHHPHQFMKPHGTGETSGDNSNQMVDYMLNPPQHHISS  
GFCNSTSFDKLSFADASLPGSFGVDYSLDHHHPHQFMKPHGTGETSGDNSNQM  
DYMLNPPQHHISSGFCNSTSFDKLSFADVMQFADFGPKLALNQSKTSEEHGID  
PVYFLKFPVLNEKLQDDHDHQALMVPQDNQDKARMEGEGEKEDETRVSEGT  
SVQLQFLVEDAQSPVAEGKNKRKRPRTTKTSEEVESQRMTHIAVERNRRKQM  
NEHLRVLRSMPGSYVQRGDQASIIIGGAIEFVRELEQLQCLESQKRRRIYGDAP  
RPMGDNSSNAMQQVQPPFVVSDDPVKLVFETGLREEIAENKSFLADVEVRVLG  
FDAMIKILCRRRPGQLIKIAALEDELELNILHTNITTIEQTVLYSFNVKVKWHI

PG07762 MEQQQQQEVNSGLTRYRSAPSSYFADLMNFTGYGGVGEDCDRFLRASSPDS  
RFFSRFMSSCGAEESKSSNFGEIGQNLLVTEPVQSQFMPPMKHEPDVINPQQQV  
VYTTQSQSDHKPVVVKLGVDNSYNVASSMKMEGGSNSNLVRHSSSPAGLFAQI  
NVDGTGYVMRRGMGNFGTGSVVANAEASFSSASRLKNQMDFPFPPSSSGIMP  
CATEIVGSPESGSGFESHNRDGSYTTGGFPSTSWDDSGLLPDNFLKGLEENDGKA  
FSNLNSLENQSGEGGTRTPTVLAHHLSLPTSSAELSNMENLLQCQDSVPLRIRAK  
RGCATHPRISIAERVRTRISERMRLQVLVPNMDKQNTADMLDLAVDIKGL  
QKQVKTLSDNRAKCTCSNNQQTQPDEA

PG08342 MGGMMWTDEDKAMAAAVLGPQAFDYLMSSSVSVECSLTAVGNDENLQNKLS  
DLVDRPNLWNFSWNYAIFWQISRKSGDLVLGWGDGSCRDLKEGEESEVARVL  
NLRLEDETQQRMRKRVLQKLHSLFGGSDEECYAFGLDRVTDTEMFFLASMYFS  
FPRGEGAPGKCFGSGKHVWLSATLKSSSDYCFRSFLAKSAGIQTFVLIPTDAGVL  
ELGSVRSIPESFELVQSIKSSFSSVSKPKPASAAPLVSEKEDGNAQFSNLGMVERP  
RITKIFGQDFNSNASQFREKLAVRKAERPWDGYSNGKRPPFNIRNAHHSNLS  
QFNNVNQAGSVEIYSPRTPPKNLHELVSNGALEQLRFNNLKTQKQAQMIDFTG  
ATSRPSVISRPLSGESERSDVEAAYKEELTGLADDKRPRKRGRKPANGREEPLNH  
VEAERQRREKLNQRFYALRAVVPNISKMDKASLLGDAIAYITELQKKVKDLESG  
REKIGCTSREASSDANPSEYHNQVSNIEIAAHDEVTVRVTCPLDHPVSRVIE  
AFREAQVTVTESKLAAGNETVFHTFVIKSEGPEQLTKEKLIAAFSREANSQPLLS  
VG

PG08366 MERIRRVGLKGWNYCVFWKLSKRFLELMDCCCAGTENNMENNNNDCCGED  
VELLFPVSSVISCRDVMFQHPRTKSCDLLSQLPSSIPLDSGIHAQTLISDQPRWLN  
FSNSCHSHLLEEPVETRVLIPVSVGLIELFVYKQVSEDQRMIDFITSQFKISNIEQQ  
TMTTNSFSVLKAGSSTIVNENDEKELFQPPVSPATMLQNLNLQYDISEDQIPPLH  
DNSPMNFFQQFNHAAENGINLLESANEVPDSMPLNPFKCSAQGFQEDVDTLF  
QKSMNLNSTTTNATAVNNNVEPLASRKRQNEHDRDSMNRSDSLSDCSDQNDDED  
NIKRRRRNGKGPQSKNLVAERNRRKKNLNERLYNLRSLVPKITKLDRASILGDAI  
EYVMELQQQVRDLQNELERNIDLDDEGTAADDKHNSTLQSEVLHGNGNGNEV  
KNIGPKYQHNGTPHMGASSGIGTESTNGNVQQMEPQVEVIQLNGKEFFVKVFC

EHKPDGFVKLMEALNSLGLVETNANVTRVLSLVLNVFKVEVCMYVNLKLIYMH  
MLYIFMTKGKIHSYILVQKSNI

PG08551 MYDPEHRETYNQIGFTESLFCAREDDERETKHLQALEQGTNEQSPPLMAPPWIS  
FWIGGAILGESGWEFGKWVNVFAHFGVGVGERGAREGSWKDGVLEVKDVA  
ALKSHSEAERKRRERINAHLDTLRGLVPSGYASWSYAICLDDIRITNLWYPTSKT  
LAENVALEFAKEKGLDVVVVNPETVMGHEVTSLYKSLSPEKLTPRDSTRVCNAI  
ALLQLLDNSYGWINPVVFKSYVEMRQAESTRIREKYLDRLYLTSSELPVQVIVEK  
AEKSDIPDIDKKKYLVPADLNVGQFVYVVRKRIKLSAENAIFIVKNMLPLIAAL  
MSGIYDEHKDEDGFLYVTYSGENTFGALGICPVYISPHLMFLVKIGAGKYIVRSF  
AGRSCGYHRDSVPLDCVGDSTASSYDRSRGVRVDTIETLFRWIALEIRPHRF

PG08659 MERGKLFKGITIPPTWNSSHFIEIQTNELNEQIPNCFNPNWDNSMDQSDPFESA  
LSSIVSSPANSNAGIPNNGENFVLRRELIGRLGGICNSGEISPHSYIGGNNSTNTSCY  
NTPLNSPPKLNLSIENQIRGNLQIPGNQLPFSTDPGFAERAARFSCFGGKNESKFPF  
KTEFSGSQIGLQENREGFLQKQIEVSDKKFHRFRSSTPEKDSMEESSVSEQIPGG  
EIVKKSQSDGNRKRKSIPRGKQKEIPSAPSAKESMVVAENEESNSKRKSKENEGN  
DSGKVTGEGNQKQNKDSAKPPEPPKDYIHVRARRGQATDSHSLAERVRRKISE  
RMKFLQDLVPGCNKVIGKAVMLDEIINYVQSLQQQVEFLSMKLSTVNPRMDLN  
MEALLSKDIFQSRVSLPHNIFPADSSAQAFYAYQSQQGNLHSNMPNGTKNPF  
INPLTAAILRNTAGMQMPSVGGFHEAAAASQVPTFWEDDLQSFVQMGFGQNQHE  
ILHGSNSTSSHMKVEI

PG09058 MSVENNMQTTYLLPELIFQEDSHEFVDTNFAAGGAASLEDIFSILEALEGVSSDEL  
NLLTPVLDHHDDETTSLGPKLEAAGVNNQQEESTSHATTTTKLATQKSTSSAPV  
DLEELETELEEEEEAAKNCSPKTKRQKHSKAAAKGEEELDGQQKISHIAVERN  
RRKQMNDNLSVLRSIMPSFYVVRGDQASIVGGVVDYITELQQVLQSLEAKKQR  
KLIYNEVLSPRRQQQLVSSPRLTSLPISPRKPPISPRIVVPISLPTSPTTPQPTSPYM  
NHHQTSLLHYQLPYLSPTNSMLNSSLPSLSSSSSSSSCSTNSIDHANELVAHKS  
AVADVEVKFCGPNVLLKTISPkipGQVLNIIALEDLSLEILNVSLKTIDELTMLNS  
FTIKVLQSLEAKKQRKLIYNEVLSPRRQQQLVSSPRLTSLPISPRKPPISPRIVVPIS  
LPTSPTTPQPTSPYMNHHQTSLLNYQLPYLSPTNSMLNSSLPSLSSSSSSSSSSC

STSNSIDHANELVAHSKSAVADVEVKFCGPNVLLKTISPkipQVLNIISALEDLS  
LEILNVSLKTIDELTMLNSFTIKESKTQSDKLTSGLP

PG09196

MEYNGHDFLEELLALRTDPWELATNIPTESNVFDTTNSHNVDNFLENPFAKIPQN  
PCFEDFSSIPFDPQALNCSSFEFCAPFGDEAVDSSNNKLDTPPLLPCGEEYSLLSI  
MDDLEVQAANACKIEPAQSAEVPIFNMGMLERKTKAKKLVGQPSKNLMAERR  
RRKRLNDRLSMLRSVVPKISKMDRTSILGDTIDYMKELLERINNQEIEVGSNN  
HHKLSLTSIFRDVKPNEVLARNSPKFDVERRNIDTRIECCAGKPGLLLSTVTTL  
ALGLEIQQCVISCFNDFGMQASCSEEMEQRGSISSEDIKQALFRNAGYGGRVIMD  
AIGEERRSFWSKSGKKEKEKVEVSGYARRGRPVVHCTPRRGGGPDSVVSCSVA  
TSAGAQFVGLE

PG09666

MEDLISSSSSSFLCHGGASPTIQRLQFIVQSRPEWWMYYIFWQTSKDSTTDRL  
VLSWGDGHFRGTKDFMLKAASSNIGLGQQDQQQQHPKFGFELERRKVAKGIQ  
SLFSETLPGIDGVVEADFPDSEWFFMVSVTRSFAGDDNIVGRTFSSGSYVWLAG  
DHELQFHNCRAKEAYLHGIKTLVCISTPCGIIELGSSYTIKEDWGLVHLAKSLFS  
PDNNMTISNMTSPAALAHAPQNPTRSLSFDFINAVSGDQNKTSGEEGNTKNN  
KLAKIGRSSSDSGNSDFESNLAPDSAMNMLKRRGRKAASTGRELAQNHVEAE  
RLRREKLNHRFYALRSVVPNVSMDKASLLADAVTYINELKVKVEDLEGKLR  
EMKKPKSISDVVYDTQSTSTTNVYHTAARSSMSYGPMNMEVDVKILGSQAMIR  
VQGPDVNYPAARLMDALRMLEFRIHHASVSSVKEIMLQDVVIKVPDGLTSEEAL  
KTALLRTLQI

PG10212

MALARIARGLRRSGATGSYASQKMPYEGVSTRKYSLSVENDKSCGSLSYLS  
NIKRADHVSFGSRGIKVTPQYQFAQAERVVEESDSEYENQKYSLEATKPGENPR  
VVVLGTGWVACRLLKGLDTKIYDVCISPRNHMVFTPLLASTCVGTLEFRSVAE  
LVSRIQFALAQDPNSYFYLATCTDVEDTKHEVYCETVGDVGLPHEHYPFKVAY  
DKLVIATGSEPLTFGIKGVKEHAYFLRERRRRDRINEKMRALQELIPNSNKVDKAL  
MLDEAIEYLKTLQLQVQIMSMGAGFFICLQWWLEVGLVCFGADLAIGIGDLGS  
VEG

PG10233

MATEALSSTEMLDFIYDTISATPYSCNDSSDTNFFLEKHEYFADSLNGASLVTPQ  
RSSVGPETADRRQNLAQGRKKRRRRPKVCKNKEEAETQRMTHITVERNRRKQ

MNEHLAVLRSLMPESYVQRGDQASIVGG AIDFVKELEHILQSLEAQKFQLLEEE  
GRRFEGIERATLLSAGCSSATPFAQFFAQPQYYMSSCSTQSTPNKFYNYRCSKNG  
GIAEIEVTLVETHANIRVLSPKRLRQLSKLVA AFHNLYLTILHLNVTTL DPLVLYS  
ISTKVILCMSSYLYTYIDDVYIKLFCCTVIHANFYG

PG10428 MKCQQDHHLQQHNFFNGNDQLNIFSIPAGQAQKFQPLINCESGFGGFLNRAVKP  
DPGMENGWPDYGKFDGDNHLGYGACGYGNVIEDEGIKEKKIKGCAEDGDSKIT  
TEHNNKKSTTNSNDCTNRETSTDTWKENS KITEVQKPDYIHVRARRGQATDSHS  
LAERVREKISERMKYLQDLVPGCNKITGKAGMLDEIINYVQSLQRQVEFLSMK  
LAAVNPSLLDFNIDNFFTKEMFPACTSDFP TIGSSSERANPAYFQFNPLQQVVTCC  
GLDLGINPPDMALTRTISAPVSITETFDSSCFNTKAMVQGPESKAMVQGPELRS  
CDGLVNYQVEMVSSISKTYKA

PG11005 MVSPENNSNWVFDYGLLDDIPVPGDLP PLEPGFQWPTNAFPASTGPSAEFVDPF  
VTS DGIKEYGSRKRIKSGSCSASDSKACREK MRRDRLNDRFQELSSILEPGRPPK  
MDKAVILSDAVRMVNQLRDEAKKLKESHEVLQDKINELKAEKNELRDEKQKLK  
AEKEKLEHQMKTVHTQSGFLPSAVPAPFAGPGQVFGGKMVPFMGYPGVPMWQ  
FTPPATVDTTQDHIEPHVSSTCIVPPDIKSSKAGHKHCA

PG11234 MANNPGDGTADDLLEQILGFPAYAGTDSNLAGNGAAAPMMLQLNSGDGSGQL  
SGGAGVGGGFHFPLGLSLEQGKGGFLKMDEASGSGNRFREDVDSRISSSVKTGF  
HGQPMHNTLPAMPHPPAIRPRVRARRGQATDPHSIAERLRRERIAERIRALQELV  
PNVNKTDRAAMLDEIVDYVKFLRLQVKVLSMSRLGGAGAVAPLVTDIPISSVEE  
EGSSEGGRNQPAWEKWSSDGTERQVAKLMEENVGAAMQLLQSKALCIMPISLA  
SAIYNTQPPDATSHVNPEMNPPS

PG11323 MGKGLSNNNTYDYDQGCRKSSLLQNRGEYCSNEGGGFQLISENDHPPEAKKAR  
LLENKLPSSSNINFQQPSNCNLSANYVDDQE QDSEAI AQMKEMIYRAAAF RPVN  
LGEEEVVEKPRRKNVKVSSDPQTV AARQRRERIGE KIRVLQRLVPGGTKMDTAS  
MLDEAASYLKFLRSQVKALETLGQQNNKLD SFVNSSSFPFNHSFPMQTPPFPS  
ETLIMIPSTLH

PG11934 MAMETVFLPQDPFYACKEFYSLGCDYFIPQENKDITGNISSNNLEQSLHGIWES  
YSSSIVRQNVQEWDPNSSPEAAAYSGGQLLREGSPVMEASPVLT TTTGRRKRRRSR



SSKNKEEMESQRMTHIAVERNRRKQMNEYLAVIRSLMPSSYVQRGDQASIIGGA  
INFVKELEQQLQTLEAQNRTTQEKINNGCSLSPVFADFFFPQYSMRTSTPSTRIL  
GIRNDQRMVENRPVALGDIEVTMVESHANLKILSKKRPKQLMKIVAGLQCMWL  
TILHINVTTVDEMVFYITISLKLEEGCQLNTVDEIADAVNHLLGRIQEEDVLS

PG11966

MSIIGDLEVEAAAATCCKMETIQSPEIPIFNMGIWSEKKSTQVKKLNQGGQPSKN  
LMAERRRRKRLNERLSMLRSVVPKISKMDRTSILGDTIDYMKELLERINNLEQEI  
EVKPNDLQQLISLKSIFKDVKPNEGLLRNSPKFDVERRNMDTRIECCAGKPG  
LLSTVTTLEALGLDIQQCVISCFNDFGMQASCSEEMEQRGIITSADIKQALFRNAG  
YGGRC

PG11971

MNHCVPDFDIEEEDSIPSSSALNRSKMSSVAEEEDIMELLWQNGQLVAHSQSQRS  
LKKSHVGGASEQREIRSEEETATAHQLFMQEDEMASWLHYPLEDSSFDRDFYGD  
LLYSAPVAAAVSAPHRQPVAVAPRPPVPPQRRLESSIEFQSTQRRYQNFSSFRPK  
GKIDSGPSSNKTGKESTVVDSDNTPFTKALESRVSCVADNAAQVSSRNVCV  
TGTATDTSPPSGGSGASVSAASAEPHKLTTTIGAMAAMTEDRKRKGREAGD  
SECQSEDVDFESAHAQQVCGSTKTKRSRAAEIHNSERRRRDRINEKMKALQE  
LIPRCNKSDKASMLDEAIEYLKSLQMVMMSMGYGMVPMFPGVQQYMPP  
MGLGMGMGMSMDMGMNRPMVPPFVLPVPSALQNPAAAPHLTPRFPIPGFHMP  
SISLPDPPRIQETSHSDLMLNSLAPQNSNQARMSNFPDPYQQYLGHLQAQNVV  
QPSKPNGSREGGPNPDNHQSG

PG12035

MERLALGGDIEYQLYWETNRFYQAEELDSLVLDETLGYYDSSSPEGAQSSAAA  
ASKNIVSERNRRKLLDRLYALRAVVPNITKMDKASIIKDAINYIQLHEQERKIQ  
AEISELESKKNFLHDFDQDQTPFMANSRLKKKKIEQQHSYDSEGRISSSPIQVI  
ELRVSYAGEKTVVSLACSKRTDTIIKLCEVFESLKLKIITANITTFSGTLLKTVFIE  
VPLFSSLCLYASFMRAVGMTYY

PG12278

MEDLISSSSSSFLCHGGASPTIQRLQFIVQSRPEWWMYYIFWQTSKDSTTDRL  
VLSWGDGHFRGTKDFMLKAASSNIGLQQDQQQQHPKFGFELEERRKVAKGIQ  
SLFSEALPGIDGVVEADFPDSEWFFMVSVTRSFAGDDNIVGRTFSSGSYVWLA  
GDHELQFHNCRAKEAYLHGKTLVCISTPCGIIELGSSYTIKEDWGLVHLAKSLF  
SPDNTMTISNMTSPAALAHAPQQNPTRSLFFDINAVSGDQNKASGEEGNTKN

DKLAKIGRSSSDSGNSDFESNLAPDSAMNMRLKKRGRKAASSGRELAQNHVEA  
ERLRREKLNHRFYALRSVVPNVSRMDKASLLADAVTYINELKVKVEDLEGKLR  
EEMKKPKSISDVVVYDSQSTSTTNVYHTAARSSMGYGPMNMEVDVKILGSQAM  
IRVQGPDVNYPAARLMDALRMLEFRIHHASVSSVKEIMLQDVVIKVPDGLTSEE  
ALKTALLRTLQI

PG12599

MEDRVPKVAQNLKWTTVREKYLGFQFFCYFCEGDVNMA SPDKIEPEKRDDDSK  
NYHAPNNSDWRFSNLTYTSMGLIPTENPIAVCKGDLISSLCSASMVDSFCP  
NIWDQPTNSQNMGFCDVNVQNNASSSSTLGFRKGS LGPPRNDLERALDMGWTP  
PNSMLKGSMLLPTSSRMLPQSLSQFPTDSGFIDRAARFSCFSGGNFGDMVNPFSI  
AESMSPYSRVAAPMQGAQEIFAGSRLNLTSGGSHENEMSMVEGSKDVMSIEH  
GASGQSPLNNEGNS EIFVRSRDEAKQGFHESGNDSGEPEFSSGGQAEPSLLEGT  
GGGTSARGHGLKKRKRIGQDTELDQVRIASNPPEAIKQNSEIQKGDQNPTSTAN  
MPGGGKHCKQGSQASDSLKEEYIHVRARRGQATNSHSLAERVRRERKISERMKFL  
QDLVPGCSKVTGKAVMLDEIINYVQSLQRQVEFLSMKLATVNPRLDFNIEGLLA  
KDIIQSRAGPSSALGFHPDMSLPYAPLHPSQPGLIQTGLPGMGTSSDALRRTISSH  
LTAMSGGYKEPTSQAPNVWEDELHNIVQMGLNSSISLDGQDLDGSLPPGHMKA  
EL

PG12618

MYTVGGSEAISRDMDNMLFSSNFKYPSQTEFAKSKEMMHS DLYDYNHRQLHQ  
QQQPPPQQPLRQQPLRQQPQNSNLARYRSAPSSFFASLLNDGVDGSNYSNGESM  
NPELMFPRFNSGEGDSDLKFGANLKQEMAESVDDYSVSASDMVYAAPAPNLN  
PVTSAIPSVENSFRGLNSSMG MENLNQSKKSSGGNCSNLIRQSSSPAGFLSNLVD  
EIGFGATNDMGNFRACNQTNMEVSSTTSRLNNHMFSSGQSSHSRFPQITENGN  
ENVGTSSQQNGHLGSGQNRDHSNRHYLPTIPNDSSFTSLKRNRD GEMKMFSNLN  
GLDTQNGDSKHFNSGLLHQLSLPSTSAEMATIENFLQFQQDTVVPCKMRAKRGF  
ATHPRSAERVRTRISERMKKLQELFPNMDKQANTADMLDLAVEFIKDLQQEV  
QTLNETRARQLLQHDL LLSAKIIRRWGRWKVITKEDDLDFEIQQGKFMRIYNKSA  
WPEVWVDFLGFVSDKFGWLILPQKNYVIRQQVLKELSVS

PG13088

MEDLISSTSPSSFLCHGGASPTIQRLQFIVQSRPEWWMYYIFWQTSKDSTTDRL  
VLSWGDGHFRGTKDFMRGSSNNGQQDSIQQQQSKLGFELERKKVAKGIQSLF

SDTLPGIDGAVVDADFPDSEWFFMVSVTRSFAAGDDNIVGRTFISGSYLWLSGD  
HELQFHNCBRAKEAYLHGVTIVCISTPCGIIELGSSYTIKEDWGLVHLAKSVFSP  
ECNSNYMMSMMSTARPPALAHQNHTRNLSFFDINVVSRDQRNKTCGDLEENT  
EKVQAKIGRSSSDSGNSDFESPLDQSTVNTRFNKRGRKAAASRRELAQNHVEAE  
RLRREKLNHRFYALRSVVPNVSRMDKASLLADAVTYINQLKAKVEDLEGKLE  
EMKKPISTISPDHHVVYDSTATQSTCTTVYHTAAAGFIQMEVDVKMLGSQAMI  
HVQSPDINYPAAARLMDAFRLLEFRVSHASVSSTVKDVMLQDVVIVKVPAGFTSEE  
ALKSAILGTLHNII

PG13708 MFSIPAAQAQQFQLISNDGFSGLVNRAVKPDPGMDNGWPDYGKFGGDDHLG  
YGYGNVNGIELNYAISRTTSCPEVAVTIAEAAGADTEQREEILPEKMSSPVTEDE  
GIKEKKIKGGAEEDSKITTEQNKNCKRETSNDTSKDNSKISEVQKSDYIHVRA  
RRGQATDSHSLAERVRREKISERMKYLQDLVPGCNKITGKAGMLDEIINYVQSL  
QRQVEFLSMKLAAVNPRLDFNIDNLFTEVKTQISQIAIKNNYIQIFVTNSVFQHQ  
QMFACTSNFPTIGLSPEMANPAYFQFNPLQQAITCCGLDLGVNPPDMALRRTIS  
APVSISETFVDSSSFNVISSTLFVPSFVILYF

PG14023 MNHCVPDFDIEEEDSIPSSSALNRSKNSLVAEEEDIMELLWQNGQLVAHSQSQRS  
LIKSHVGGASELREIRSEEETATAHQLFMQEDEMASWLHYPLEDSSFDRDFYGD  
LLYSTPVA AVSAPHRQAVAVAPRPPVPPQRRELESSIESQSTQRRYQNFSSFRPK  
GRIDSGPSSNKTGKESIVVDSNDTPFTKALESRVSCVADNAAQVSSRNVCVSVT  
ATATNTSPSSPGSGASVSAASAEP AHKLTTTIGATAAMTEDRKRKGREADDS  
ECQSEVDVFESAHAKKQVCGSTSTKRSRAAEVHNSERRRRDRINEKMKALQEL  
IPRCNKSDKASMLDEAIEYLKSLQMQIQMMSMGYGMVPMFPGIQQYMPMGL  
SMGMGMSMDMGMNRPMVFPFVLPGSALQNPGAAPHLTPRFPIPGFHMPPISLP  
DPSRIQATSQSDLMLNSLAPQNSNQARMSNFPDPYQQYLGLHQAQNQVVQSPS  
KPNGSREGGNPDNHQSG

PG14197 MDSRLPAAGPIINTCNLQENRSDSFRYCIANTELSEFEEEEEEGLGEGEEVKPRQ  
HFKIPSLDKMPFTQMLKSVESPSFPLPSFIQPQSFQVLLRLQHQQRAWQDQSHTH  
YSYLPPETTSPINHGA VEPENCLTHDILDESETNPNPHSVSQEQPSFPTAAVQSSL  
DAVSGPLVKNVTDKEKRKRREREGRRGKPKRMIHIAVERNRKRQMNDHLNSLR

SLMPPSYAQGVLSVTDPV

PG14512 MSNRRRSRQSTAGASGISDDQIADLVSKLQQLIPEIRNRRRNSDKVSASKVLQE  
TCNYIRNLHREVDDLSDRLELLDSTDTSDQAAIIRSLLM

PG14815 MVEFGGSSSSPVLSQEHVPTLQRLQYIVESQPHCWSYVIYWQTSKDSENGCL  
LLSWGDFHFRGPTKHTTLPKDQTKHTIDGSIDGDVMDAEWFFVMSLTRIFRAGD  
GSAPGKAFSSGAHIWVCGTDQLHVAECERAKEAQLHGFQTFVCIPTCSGVLEMS  
SDITISENLSLVQQTCLFGSDLIGLIPKQPNSNVGSCSYIDMEIPDFDLHDQFVA  
VRPATPHVEKKNAAKKRGRKPILGQDIQVNHVEAERQRREKLNNLFYALRAAV  
PNVSRMDKASVLADAISYINELKAKVDDLDSQLEFRASKKSGKAESAGADTVE  
NPNSTTTTSDVQKMTSTPSVDVEVKMVGSDAMTIRIQSDNAIYPGEKLMKAIR  
ELELHVHHASMSNVNELIMLQDIVIRVPAADGGLRSEGLRSALLRAMEQ

PG15082 MFGDSRALFTDSNAIFSSNSNPKGEDMLTKSRMNFDMNNNSSIQDYKQYQNNQ  
TNSGLLRFRSAPSSLLANFDNGVDKSGDSNENLMAESFKGLDDNKSLPNGFAVN  
SQLPPHYPRYSSNLGLETQVGAVDNSSSYRMGSSMGMENQAKMVSSLMRQNSS  
PAGLFSHLNSQTGYAAMRGGVGNRYRLGNGSNGDISPTASRLKSQMSFSSGLPSS  
LGMLSRISEIEGENIGATGNDDAKNGSGNGDTQFYTSEFPLSSWSDSLHFAENFT  
GLKRELDDEKLFSGAQNTDLANRPPLSHHLSLPKTSSEMAAMDKLLQFQDSV  
PCKIRAKRGCATHPRSAERVRRTRISERMRLQELVPHMDKQTNTADMILDVAV  
EYIKDLQKQFKTSLDNANCKCSVTV

PG15345 MSSRRRSRGQSSGASRISDDQIADLVSKLQQLIPEIRNRRRPPDKVSASKVLQETCN  
YIRNLHREVDDLSDRLELLNSTSDSAQAAIIRSLLM

PG15509 MLPCSNGLIAWLEGEEDKGISWAVRDNSEGDTCKNLGMNAASLTSFKSMLETDW  
FANNTMNPSQNILTNHHPDFNNGNLLLQAMDSSSSCSPAPFTLDPSQSHYPFFP  
PKSSFSSLFNVPFDNSFDLDCELNFLTNSNSPVLNPELSSGSDFAATRFLPIYDNN  
DNSIGGGFSPIGYDGFQSSSGNALFSNSAKILRPLEVLPPVGAQTTLFRKRVALR  
QGSGEVDKLGWGNREDLCKKMKRSFSEDDDEIDILGSFYYSDELYSRVND  
NNNTNDGGIGNNSNANSSVTVEDQKGKKKGLPAKNLMAERRRRKLNDRLYM  
LRSVVPKISKMDRASILGDAIDYLKELLQRINDLHNELEATPPGSLITPTSSFHPLT  
PTPSTLPHRVKEELCPSALPSPKNPSARVEVRAREGRAVNIHMFCARRPGLLLST

LRALDSLGLDIQQAVISCFNGFALDIFRAEQCREGQDVLPEQIKAVLLDSAGFLG  
AM

PG16018 MATEALSSTEMLDFIYDTISATPYSCNDSSDTNLFLEKHEYFAASLDGASLVTPR  
RSSVRPETADRRQNLAVQGRKKRRRRPKVCKNKEEAETQRMTHITVERNRRKQ  
MNEHLAVLRSLMPESYVQRGDQASIVGGAIDFVKELEHILQSLEAQKFQLLQEE  
GRRFEGIETAALLSAGCSSATPFAQFFAQPYMSSCSTQSTPNKFYNYRCSNNG  
GIAEIEVTLVETHANIRVLSPKRLRQLSKLVAAFHNLYLTILHLNVTTLDPLVLYS  
ISTKVILCMSSYLTYIDDVYIKLFCCTVIHANFYG

PG16210 MDSVRVFLNEDWDSLSKMFSSDEEADLALQFLQHFGTNPSNLFDENLFYSYENF  
NTNFYPSQEISTNYSTSANVLWLNEETGNDTLENADNSTALGLKRKFEEPQQHE  
TVKVLKTKSESVENPKKKSQIVKDKPKNKRNAQPKKKQKLIENVNNDDESSSSC  
SLEDDSNVSQELIGGEGLKSSQKARSGRGAATYPQSLYARKRRERINERLKILQN  
LVPNGTKVDISTMLEEAVHYVKFLQTQIKLLSSDDMWMYAPIAYNGMDMGLY  
QKISPTL

PG16376 MLPRNNGGVWMEGEEDDAVLWAARNSNEGETGKDLGMSGSSLNSFKSMLETE  
WFGNNTLNPSQSILSNQHPEFNNSNLLLQAMDSSSSCSPSQAFITLDPSPSHSPFFP  
PKSCFSSLFNAPFDNSFDLACEPTFLTNSNSPVLMSFNNGISSMPNLELGSNSDFAA  
NRLPISENNCNPPIGGGFNPIGFDGFEGSSTGNALFSNRAKVLMPLENLAPVGA  
QPTLYQKRTVLRQGSSEADKLGWGMREDFDKRKRKNINEDNDEIDEESIDISG  
SFNYDSDEPYTGNMNNNDNSGGGIGNNLNANSSVTVDQKGGKKGLPAKNLM  
AERRRRKKNDRLYMLRSVVPKISKMDRASILGDAIDYLKELLQRINDLHNELE  
ATPPGSMITPTSSFHPLTPTPPTLPHRVKEELCPSAIPSPKNPSARVEVRAREGRAV  
SIHMFCAARRPGLLLSTMRTLDNLGLDIQQAVISCFNGFALDVFAEQCREGQEV  
PEQIKAILLDSAGFDGSV

PG16383 MDIDFYKSAPEDIEMLMQMDKLPDFLGAYNNHVSEIPAMEYSNTQGSGS  
STNTDTNNSNIGGLPQVVESSTFMHQPSTCISFTGSQPVEESAELSFLMSSSN  
PGRWRNGGEINIPSAQKRSSMAAMREMIFRIAAMQPIHIDPESVKPPKRRNVKI  
SKDPQSVAAARRRERISERIRILQRLVPGGTKMDTASMLDEAIHYVKFLKNQVQS  
LERSAVNRHATTAAGIGFVPVPMSSGSFIPMQQAIKGYQLSSAQNVQHYLDA

PG16916 MSGGGGENNMHTLLANFFDTSSELD AETIYLGAASPDNIFSILEALESSEFEPITSM  
THETSHLDPKEGEPEAEAGAKRLVSQKSSSSLSLSSAPLEESKTELEAAAANDSSPK  
TKRQKLSIGAAGEEDDGQQKISHITVERNRRKQMNNDLVLRLSLMPSFYVKRG  
DQASIVGGVVDYISELQVQLQSLEAKKQRKVYSEVVLSPLRVVSSPRLTSSPLSP  
RKPPSPRLVPTSSSLPISPRTPITIPYKHHRLHQLSPTMPAAAAAASSLEPSSP  
PSIDHTSCGNELLANSKSAIADVEVKFSGPNVLLKTTSPRIPGQAVKIISALEEHLS  
LEILNVSVNTIGQTMLNSFTIKVTN

PG17327 MDNLGWECSPVVTNVESSWSNQQHQIAERFIATDSNCSGFGTGVKIFIPIQLHKI  
IDHEPSDHDVHSNSKKESQMRHLVPPLDSIKVATTLNISQHQEATRLAANTML  
AKSGAGTSWGEALIRPHMMGDPLSGLMANFGMPQDGNKAAA VSTTTASLESL  
DCLLSATNSNTDTSVEDDGINSILFSDHSKNLWNNFGSNNISSGSDSGINNNSSRI  
KYHNQYCSRWMNESVPNSTTKRRNEGDSWNKGGGFQLISENPPQIVKKARLEK  
RPSSSNISFQQPSNSSIINTCVEEPDSEAIAQMKEMIYRAAAF RPVNLGEEAVEKP  
KRKNVRISDPQTVAARQRRERISEKIRVLQRMVPGGNKMDTASMLDEAANYL  
KFLRSQVKALEALGHKIDFVNCPISTPLNPNHPFNSVIPFNRSIFPMQTTHESLPK  
P

PG17916 MSDAYLQADAGGSSIMFPEVMPWTLPPP VHHGFNPIRDQDPFLPPPPPCAPYGG  
GFFNRRSFGYDVGPSSDHLRLLSDKVLGQVIQPGSSPFG LQAELGKLTAEIMDA  
KALAASKSHSEAERRRRERINNHLAKLRSLLPSNTKTDKASLLAEVIQHV KELKR  
QTSIAESSPVPTMDELTVDNEAAEDGRFVIKASLCCEDRTDLLPDLIKTLKALR  
LRTLKAEITLGRVKNVLFITADDQELSGGDQQHPPPPQQYSSISIQEALKAVLE  
KSSGDESSSGSVKRQRTNISISYT

PG18500 MEPSQYSLLEELLGPSRENWTKFPSAQVNNNNDADELFP GGWSYESLDFTTSNS  
SLPEVLVTNSQVESPSFACSFNEIYPFVNGYSSKNNGNFGVYNFEEMNSSSSKEQ  
ACLDHIPVFDMGTSEDRRRKIRKVEGQPSKNLXHP SKNLMAERRRRKRLNDRLS  
MLRSVVPKVSMDRTSILGDTIDYMKELLEKIHKLQGDHNEADGNNQINSMG  
NLKELNMKEATDHAKNSSKFDVERRDKSTGIEISCAEKPGLLLSTVNTIEALGLD  
IQQCVISCFNDFSLQASCSEAAEHRAVVSCE DLKQALHMNACYGGRCL

PG18520 MAMDALSSNELLFNFIHDTINSSTPLYTCNEDSNFLENAQKPQEYIAAGSVINA

TSSMTPRTSSVEPEPKERLPNLAVQGRKKRRRRPKVCKNKEEAEAQRMTHTIVE  
RNRKQMNHLAVLRSLMPESYIQRGDQASIVGGAIDFVKELEHLLQSLEAQKF  
QQLQEGGRGSSMNNGSTTTTTDGTTAELIPNPFQFFQYSCSHMSNKFICSK  
SNGAVADIEVTLIDTHANIRVLSRRRLRQLSKMVSSFQTVYLNILHLNVTTLDPL  
VLYSISAKYNNSSKILQMKMTTECKNLAGFRQGI

PG18523

MNLWSTTTTTDDNASMLDAFMASDLTSFWPPPPVPPQSSSTSTSAAAVFSQES  
LQHRLQSLIEGAKESWYAIWFQSSVADYSSSQTLGWDGYKGEDKEKQLL  
KRKSTSATEQDHRKKVLRNLSLISGNQASPDDAVDEEVTDEWFFLVSMQSF  
VNGTGLPGQAFFNSSPVWVTGIERLASSHCERARQGQTFGLQTVICIPSNNGVVE  
LGSTELIFQSSGLMKNVRILFNFAIESGSWPLPSEPNEPDPSALWLTDPVPVPSVE  
IKEIPLNSNSKPPQIMFENHSSSTLTENPSTSSVINVHNQHLNQQNGVLPRELNFSG  
FGFDGISSTNVRNGNLNSHACKPESGEILNFGESKRSSCSGNGNLFSGNSPFGGIV  
EDNKKKSPNSRGSHEEGMLSFTSGVILPSSGVVKSSGGGGSDSDHSDLEASVV  
KEVESSRVVDPEKKPRKRGRKPANGREEPLNHVEAERQRREKLNQRFYALRAV  
VPNVSKMDKASLLGDAISYINELKSKLQTSDEKDELRSQLDSLKELSNKESRY  
PTQAAVEQDLKMSNHHGSKLLDLDDIDVKIIGWDAMIRFQSTKKNHPAARLMAA  
LKDLDLVHHASVSVVNDLMIQATVKMVSRYTQDQLRVALTARVSETR

PG18773

MADLYGNNGHRSSSLESEEMSSFLHLLQNSAGTPPYEFFKEKQNSDFADPGGF  
FPAAEKESTVNPFCVSGADSDQITSSRRNLPYNSNDADEFDFGCEEPEEPEVPANS  
VPPRSSKRTRAAEIHNLSEKRRRSRINEKALKALQNLIPNSNKTDKASMLDEAIEYL  
KQLQLVQMLTMRNGLGLNPVYLPETLEPVQLTQRGVNYDEGIVLMNANRRD  
TVSTDPKFSAQRPLYMSDPAPRIVIPSITNINKSETS YGLEPSILESI

PG18879

MEPSQYNLLEELLGPSRENWTKFPSAQVNNNNDDELFPGGWSYESLDFTKSNS  
LPEVLVTNSQVESPSFACSFNEIYPFVNGYSSKNNGNFGVYNFEEMNSSSSKEQA  
CLDHIPVFDMGTSEDRRRKIRKVEGQPSKNLMAERRRRKRLNDRLSMLRSVVPK  
VSKVIDYTLYHLSSFTQQTSRYFN

PG18931

MERTYSSGIPMGHVDDDDYNLVDFMDEANFEHFIALVRGESDDPIVKFCPNYLD  
DHINDCCVDNQFVPTRGPLYDQFNPPINTFSDPILLDSLPCDLKEGEEEEENDTEEY  
SSATINTTTPPPNTNSNTTSTTKKSTKGDRSRTLISERRRRDRMKEKLYALRALV

PNITKMDKASIVGDAALYVQELQMQAKKLRAEIASLESSLTGVDKQQGGGLYD  
NANNKSIHPTSKKISQIDVFQVEEKGFYVRLVCNKGRGVAASLHKALDSFSSFIV  
QSSNLATADKNFVLTFTLNVRKLSSTNSSFCFEDYCMKLIYTMEIKQVREREM  
DMNLPNLKLWVAGALLNQGFDF

PG19462 MGGMMWTDDEDKAMAAAVLGPQAFDYLMSSSVSVECSLTAVGNDENLQNKLS  
DLVDRPNLWNFSWNYAIFWQISRSKSGDLVLGWGDGSCRDLKEGEESEVARVL  
NLRLEDETQQRMRKRVLQKLHSLFGGSDEECYAFGLDRVTDTEMFFLASMYFS  
FPRGEGAPGKCFGSGKHVWLSATLKSSSDYCFRSFLAKSAGIQTFVLIPTDVGVL  
EMGSVRSIPESLELVQSIKSLFSSVSKPKPASAAPLVSEKEDGNAQFSNLGMVERP  
RITKIFGQDFNSNGSQFREKLAVRKAERPWDAYSNGNRPPFPNIRNAHHGSNLS  
QFNNVKQAGTVEIYSPRTPPKNLHELVSGEAPEQLRFNNLKTQKQAQMIDFTG  
ATSRPSVISRPLSGEAERSDVEAAFKEELTGLADDKRPRKRGRKPANGREEPLNH  
VEAERQRREKLNQRFYALRAVVPNISKMDKASLLGDAIAYITELQKKVKDLESG  
REKIGCTSREASSDANPNSEYHNQVSNIEIAAHDEVTVRVTCPLDHPVSRVIE  
AFREAQVTVTESKLAAGNETVFHTFVIKSEGPEQLTKEKLIAAFSREANSLQPLLS  
VGFCKNKLNANEVCTIRAFQVGGDDSNPN

PG19765 MGSLSTFKSMVEVGEEVEEWYLAATNNITFSPNFTEADNINLLLQPVDSSSSCS  
PSSTSLFDNLDP SHVNYFLPQKPTNPLLLNPLSNNPLENNFDLSCETGFLENQALN  
SLSRGKGILTEFNLSSQAHMDLHFSTHLLQLAENSGAISAGFDSTGFQGFEPGD  
GNSLFFNRSKLLKRLNFPSVGAQSTLQKRAALRKNLADSVCFLLGNVGGF  
DRREVGEVSEKRRKNTHGDDLNL SFDGSGLYNYSDEFTENNMVEERGKNGG  
NSSNANSNVTGGDQKGLPAKNLMAERRRRRKKLNDRLYMLRSVVPKISKMDRA  
SILGDAIEYLKELLQKINDLHTELESTPTSS

PG20047 MVSPENNSNWVFDYGLLDYIPVPGGDLPPLEPGFQWPTNAFPASTGPSAEFVDPF  
GTS DGIKEYGSRKRIKSGSCSASDSKAGREKMRRDRLNDRFQELSSILEPGRPPK  
MDKAVILSDAVRMVNQLRDEAKKLESHEVLQDKINELKAEKNELRDEKQKLL  
AEKEKLEHQMKTVHTQSGFLPSAVPAPFAGPGQVFGGKMVPFMGYPGVPMWQ  
FTPPATVDTTQDHFEPHVSSTCVVPPDIKSSKAGHKHCA

PG20127 MELEAIVFQERLGYSCSNKDLYNLSGGDWSSHDLDLKETQEKLGS LDIVENQA



ENCLYNPFPSQEELPHLEQWICHSGIEPEMVNPQEFQPSETSTVMTGKCKRRRSK  
SKKKMENIENQRMQHIAVERNRRKLMNEYLSVLRSLMPDSYVQKVDQASIVGG  
AINYVKKLEQQQLQYLSGQSPLNQDFESDHTDSSSTFTEFFAFSQYTISSSKRDNST  
AILED SMADIEVIMVESHANIKIRSQKRPKQLLKLKVGLESLRLTILHLNVTTSDQ  
IVLYSLGVKVEGDCKLYSIEEIATAVNQMLAEASSFIYT

PG20810 MALEEAIVFQDLFSYNNSRDLYNLLGGNIWSSDFDLIQABEILNSSLDIVENQAEN  
FPYSSPVSQ LMPHLEQWGCNSFIEPEIISPNGGQEFPLSETSTTMPCRPKRRRSRSK  
KNMEDIENQRMTHIAVERNRRKQ MNEYLSLLRSLMPKSYVQRIDQASIVGGAIN  
YVKELEHQ LQLLSGQNFEGGTSSSSPFTEFFSFPQYSTGSSSGGNLIATDDPWAK  
ENKIAAMADIEVTMVESHANL KIRSKTRPKQLIKMVNGLQSLRLTILHLSVTTVD  
QVALYSLCVKVEDDCNLNSGEEIAKSINQMLAMIQEVSYIYG

PG21026 MEELVVSSSSTSNPSDSLPHQEQQHAPLFTLQQRQYIVESQPAESWAYVIFWQ  
TDNGRLLLSWGDGHFRATTKPIIFPSRDQINNMDVVVDGDFTEAEWFYVMSLAR  
TFPAEDGSIPAKALSSGAHIWLSGGHQ LQLSECKRAKDAQAHGIQTLVCIPTSSG  
VLEMGSSTVIKENLSLVQVKS LFGSELIGFISNHPNPSSNAEWSSYLNME LSDS  
ELLPQFESANDINNIPVAVDK KKTAKKRGRK PALHCSQQDIINPNNHVEAER  
QRRERLNSRFYELRSVVP HVTRMDKASVLADALSYINEMKAKVDELESQ LVLQ  
KEESKTRSSAKLECDTTNNSVDQPKPNSSPPSPAAAAGVTLEVDIKIVGAVARIRI  
QWKNAEYPGAKLMCAVRELELQVQVNMSTINDFMIQDVVVVRVPDGF TTDG  
LRDAIVTALQKKK

PG21048 MTDQGSGLLWENQPWAFSSSDNSGGGCHEKS GEKLPDSSTSN SQTPSGNEPVT  
EGGEKRSSDEDEGKNGKEIIEGKGGGESSDHEMHIWTERERRKKMRTMFSNL  
HALLPQLPPKADKSTIVDEAVTYIKTLETTLKKLQTQKLQSLHGVATMKYDLSS  
LVTPPKPPMDTREAFIADQVSSNINMQAMITTATNSSRIPGFPPIFQSCIANNVIL  
NIVGG LDAQFCVFAPKKPGLLTAITYVLEKYKLEVVSASVWSENYKSMYTIQTH  
ACREGLIEAFP AEALYKMAARDIDFFINSESTN

PG21441 MANNPEGYSDDFLEQILAIP TYSGLAGTDGSSSETTPLTASHLASGGGVGIQPPF  
FPLGLSLDNGQRERGS MYMGS LFPVFEHLQPHSVRHSVPQIHQAFQSQT TTTSTAV  
TVPHPPNMRPRVRARRGQATDPHSIAERLR RERIAERMRALQELVPCNKSDKA

AMLDEILDYVKFLRLQVKVLSMSRLGGAGAVAQLVADIPLQSVEGGISENGNDR  
PIWENWSNDDTGQEVAKLMEEDVGAAMQFLQSKALCIMPISLAALIYPTNQPDI  
STLVKPEPPAPS

PG21758 MTDDGGGLLWKNQSWANFLNSDNSGAGGVDEKSGKKLLDSSTSNNQIPSENEA  
AVVAGGKKGSSSDLEGNKNNKNGKGIINEGKGGTGGGGGGGGSDQSSDHE  
IHIWTERERRKKMRFMFSNLHALLPQLPPKVIPVCLFIDPADKSTIVDEAVNYIKT  
LQHTLQKLQKQLERLHGVATVNYGGLPSLVTPPKLAMDTREAFADQISSNTN  
SIPITSTNSSISSPQFPPIFQSWNSKNLILNVCGLDAQFCVCSPKKLGLLTGICFVLE  
KYKLEVVSQAQVSSDNCKSMYMIHTHACCLDFLEVVPVEEIKQAAGEIIFINSK

PG22215 MDGIYHGENKQLPSSSSGNTRAQTLFEEYQKSVFIVDNRSAPGFAFKNSLPYIEF  
KELELQTLASTKTQLQFYQEARIKTAIFMGCKTGEIELGMSIDTQADFEMKMRN  
CFPEDFSQLQSIPIQQLPQPTDQNPSSSSSSLSLSIDSPSSTMPNFLNDNNISTNP  
YPLEPSVKPVQTLQIRNNIQFPTLLQSEEDDAMTRAILAVISSSSSPSSSTNSSQKP  
QQNSSAFKSYRSVLAPTSRVAQKQNMMLKRAIAFVTSTNTLMRNQEQTQNGNR  
PASNLHHMISERRRREKLNESFQALRSLPPGSKKDKASVLSSTKEYVNSLKAE  
VEELRRKNQILEAQLLQNDQELGQMITGTDSSTTDQRVVDVRITNIINAETTSSE  
AARILDLRVIVRSGGEYYCSMLDLAIRVLEFLKQLRNVITLISVEADTPMLETTS  
VNRLVLRKIEGDEWDDTTFQEAARRVVADLAQ

PG22741 MSEETINVGKMSRGRNGHLDDNTQGFKSKNLDAERRRREKLSARILELRSLVPII  
TNAIYMQNADENMNKATTITDAVRDLSKLFEMEAREQELKTESSEIDAEQEM  
KKWGIEAEVKVNQIDANKLWMKMFVAKKRGAFKLVAMTVLGFILDDTSVT  
TSNGAVLVTSCVVGKDGGLAADQISELLEIIRAI

PG22897 MDNGIEIRRRMDQMEMMTMMMQLDKLSGHNYQDIYEFPEMKFSGGSSSSVEST  
PPTTFHSSFMGSPVQEPMTQFLEPTFSTPQLRSSSELLQKTNVNSEEAMREMIFRI  
AAMQPIQIEPESVKPPQRRNVKISKDPQSVAAARRRERISEKIRILQRLVPGGTKM  
DTASMLDEAVHYVKFLKKQVQSLERAGPNRAMGVGYPATMATAVPTGFLWIK  
DS

PG23736 MDPPAIMNHGAFRSGNAAPNNLAEIWPFGQSLGQFTENPNREDDPMVLDQR  
GERKRRQDDSSIIIGVSTGRDANGTSDRDIKRLKASGSRDEELESKVETEAINSG

KQADQSTKPSEPTKQDYIHVRARRGQATDSHSLAERARREKISERMKILQDLVP  
GCNKVIGKALVLDEIINYISLQQQVEFLSMKLEAVNSRTGPSIEGFPSKDYGQQ  
TFDMAGVTFGSQAPREFSRDSSPEWLHMQIGGNFERSA

PG23826

MEISHIRGFTELGMEDPYSNIQWPMNSFDELSALSALAAFGENLHHSFYQPLYDI  
KPSPEVSCITITERPMKQLKTNWSSSERTDHTSNTQATYSNYTNQFGNVKPKDE  
VLPSKSTTTLPDLMTSQGSFENQNYVFKASQGAKRISTGAQLSQAQDHIMAER  
KRREKLSQRFIALSALVPGLKKMDKASVLGDAIKYLKQLQERVKTFEEQTRKKS  
TESVVFVKKYELLADDDKSSSGEQFSGNPVNEPQPEIEARFSDKDVLRHCEKK  
KGVLEITIAEIEKFQLLIINSTALTFGTSSLDITIALMDEKFTMTAKDLVKNLRTAL  
KQLIGYVI

PG24302

MEQAPQLLLNIHIARKKCMMEDFGSSSSSSSPVSLSQEHVPTLQQRLOQYIVESQ  
PHCWSYVIYWQTSKSDNGILLLSWGDGHFRGPTKHSTLPKDQINHTIDGSIDGD  
VMDAEWFYAMSLTRIFRAGDGSAPGKALSSGAHIWVCGTDQLHVVECERAKE  
AQLHGFQTFVCIPTCSGVLEMSSDITISENWSLVQAKCLFGSDLIGLIPKQPNPS  
NVGSCSYLDMEIPDFDLHDQFVAVGPVTPQVEKKNPAKKRGRKPIQGDMNVN  
HVEAERQRREKLNNRFYALRAAVPNVSRMDKASVLADAVSYINELKVKVDDLE  
SQLEFRASNKSGKAESAGADTVENPNSTTTTYVHQMAEPSPLVDVEVKMLG  
SDAMNIRIQSDNSDYPGAKLMKAIRELELHVHHASMSNVNDLIMLQDIVIRVPA  
ADGGLRSEGLRSALLRAMEH

PG24323

MADFTSEIQLKPSFSFLDFDPNMELLMNQFTNQNPASTGMGFSIDNFFTTQQVP  
DEFPGNLAENFPGIFHVDEKNIILNSAPPHGNGNEFHQCKRLAIQELDSTSSSGIS  
SPQTSNDNGNKGNSSGRGKRMKSSEKEEEKPKGVVHVRARRGQATDSHSLAER  
VRRGKINERLQCLQDIVPGCRKTMGMAVMLDEIINYVRSLQNQVDFLSMKLTA  
ASTFHDFNSDQDALEALQRGKAFAEQKMQRVMRRGYEELASTTQLGPLDFPFG  
TYPISISYNT

PG25084

MSKCPKWINLITTPWVNQFNQPYQSSINDQSPLDYIPITEPKECNVARKVQKADRE  
KLRRDRLNEQFMELGNTLDPDRPKNDKASILGDTIQVLKDLAQNRLKAEYAS  
LTEESRELQEKNDLKEEKASLKSIDNLDLQYQQRYRAMFPWGGVDHSSVVMH  
PPSYPPVPMPIPPGPIPMHPSLQPYAFFGNQNPALVPNPCSTFVPPYLTLNTIIEQQ

SAHYVSPVPPSSRSHVSSKQDSRNRSSDQGKSKTDKYEDSNDVATELELKTPG  
STADQDSSLGQRKSKKSLRKESLSDGNSSSRCSSSHTVQASSSDSVVGGMRA  
EDTERGQI

PG25232 MEQQQQQEEEEVNSGLTRYRSAPSSYFADLMNFTGYGGVGEDCERFLRASSPD  
SDRFFSRFMSSCGAEESKSSNFGEIGQNLLVTEPVQSQFMPPMKREPDVINPQQQ  
QVVYTTQSQLDHKPVVPKLGVDNSYNVASSMKMEGGSNSNLVRHSSSPAGLFA  
QINVDTYGYVMRRGMGNFGTGSVVANAEASFSSASRLKNQMDFPPLSSSGI  
MPRATEIVGSPESGSFGESHNRDGSYTTGGFPSTSWDDSALLPDNFLKGLEENDG  
KAFSNLNSLENQTGEGGTRTPTVLAHHLSLPTSSVELSNMENLLQCQDSVPLRIR  
AKRGCATHPRISIAERVRRTRISERMRLQVLVPNMDKQNTADMLDLAVDIK  
GLQKQVKTLSDNRAKCTCSNNHQTPDEA

PG25335 MGTEDNGDMRFQHRDGDMLNCPSPMMNTNPLSDKVVGMMAMGSDSMFKASN  
GAVPYFSSGWDPLVSLSQSENFPHSGFSNAAYPVVLENQVISSTSHLAHYQPDS  
GLGELMPKLSFCGSGSFSEMVNSFGLPECGRMNYSQNKEGGTGKALITGTHSEE  
ESQNSSEDKSSPNGKKRRASESHPPFNSNKNAEVPQQHDPSGDNLEQDEKKHKI  
EQNINANLRGKQTSKQTKENS DSGDAAKDNYIHVRAKRGQATNSHSLAERVRR  
ERISERMRLQELVPGCNKITGKAVMLDEIINYVQSLQQQVEFLSMKLATVNP  
NVDIERLLSKDVLNLRSSNAAVLGFPGLSPTHFPQGSPLGIPTTTQPFHTIPQSIW  
DNNELHNLLQMGFDSNNHLGPIDGKTETLISKSIYSSFLKRQAPIYILIKMRNSA  
KKHFDCLCYELYL

PG25345 MSSEYTPKWNVRHQREQKVEGEIERPNRRSSHVHHHQPTPLVHMSNYQV  
AELTWENGQLAMHELGGILPLPSSAPKATWGRTGDTLESIVHQATYHSQNNINL  
PQTTNPHLPHKSSVVAASSGKWGENSSHREINPPGFAKKRVRSEYSQCGRNFSS  
VQECVDRSACASASATFCRDNDTMMTWASFESPRSLKTKSADEDSACHDGSIQ  
ENPDEERETKGETVRSHSTRRSRAAAVHNQSERRRRDRINQKMKALQKLPNA  
SKTDKASMLDEVIVYLKQLQAQVQMMNVRNMPQMMMPLGMQQQLQMSLLA  
RMGMGVGLGMNMGMLDMSALARASPQSLSPLIHPNPATTATPSFIPPPFLVPPMI  
QRHIQSQASANQCANTSVPTDPYCTFLAQSMNMELYNKMAAEVYQQQVNO  
AAQATSGASKSNHKKKKRKKKKKKKKKKKKRDLQQNELFLLGFSTSIDTQNI

KGSIIPIEEATILKMGHNHNYQGAKSRRGDSRELKCLGDKAPD

PG25389

MALEEAIVFQDLFSYNNRDLYNLLGGNTWSSDFDLIHAEKLNSDLDIVENQA  
ENFPYSSPVSQMLPHLEQWGCNSFIKPEIISPNGGQEFPPSETSTTMPKRRRRSR  
SKKNMEDIENQRMTHIAVERNRRKQMNAYLSLLRSLMPKSYVQRVDQASIVGG  
AINVYKELEHQQLLSGQNFEGGTSSSLPFAEFFSFPQYSTGSSSGGNLIAITDDP  
WAKENKIAAMADIEVTMVESHANLKIRSKTRPKQLIKMVNGLQSLRLTILHLSV  
TTVDQVALYSLCVKVEDDCNLNSGEEIAKSINQMLAMIQDHPIYG

PG25512

MYTVGGSEAIRDMDNLLFSSNFKYPSQTEFAKSKEMMHSDLYDYNHSQLHQQ  
QQPPPLPPPRQQPQNSNLARYRSAPSSIFASLLNDGVDGSNYSNGESMNPPELM  
FPRFNSGESDSDLKFGANLQEMAESVDDYSVSASDMVYAAPAANLNPVTSAI  
PSVENSFRGLNSSMGMENLNQSKKSSGGNCSNLIRQSSSPAGFLSNLVDEIGFGA  
TNDMGNFRACSQTNMEVSSSTSRLLNNHMFSSGQSSHSRFPQITENGNENVGT  
SSQQNGHLGSGQNRDHSNRHYLPTIPNDSSFTSLKRNDRDGMKMFNSNLGLDTQ  
NGDSKHFNSGLLHQLSLPSTSAEMATIENFLQFQQDTVVPCKMRAKRGFATHPR  
SIAERVRTRISERMKKLQELFPNMDKQANTADMLDLAVEFIKDLQQEVQTLNE  
TQARCTCSSKIKQTSPTA

PG25659

MTDYRVPTAAMNLWSTTTTDDNTSMMDAFMSADLTSFWPPPTPPPPPPQSSST  
STSTAAAAVFNQESLQHRLQSLIEGAKESWTYAIFWQWQSASGDIDYLSSQSLL  
GWGDGYKGEDKEKQLKRKPTSAAEQAHRRKVLRELNSLISGSQSFDDAVDE  
EVTDEWFFLVSMQSFVNGAGLPGQAFFNSSPVVWTRAERLLSSPCERARQAQ  
TFGLQTMVCIPSNNGVVVELGSTELIYQSSDLMNKVRILFNFSIDSGYWPVSEPN  
ESDPSALWLTDPSPNVEIKEIPMNSAKPPQIGFENHSFSTLTENPSTSSVINVQN  
QHSKQSQQQNGNITRELNFSGFDFGISSTVRKGNNSHVCPEKESKLNFGESK  
RSCSNGTLFAGHSQFVGIVEDSKKKRSSSRGSYHEEGGILSFSSGMILPSSGIVK  
SSGGGSDSDHSDLEPSVVEAIVSQVVDPERKPRKRGRKPANGREEPLNHVEAE  
RQRREKLNQKFYALRVVVPNVSKMDKASLLGDAIVFINELKAKLQTSDEKDEL  
RSQLESKKELASKESQYSSQMAADKDLKISNDHGKFINLDIDVKIIGWDAMIR  
IQCSKKNHPAARLMAALEEMDLEVSHASISVVNDLMIQQATVKMGSRFYTQEQ  
LRVALAAKVSETR

PG25699 MLPRSNGGVWMEGEEDDAVLWTARNSNEGETGKALGMNGSSLNSFKSMLETE  
WFGNNTLNPSQSILTNQHPEFNNSNLLLQAMDSSSSCSPSQAFITLDPQSHPFFP  
PKSCFSSLFNAPFDNSFDLACEPTFLTNSNSPVLMSFNNGISSMPNLELGSNSDFAA  
NRLLPISENNCNPPIGGGFNPIGFDGFEGSSAGNALFSNRAKVLMLRENLPVGA  
QPTLYQKRTVLRQGSSEADKLGWGMREDFDNKRKRNNINEDNDEIDEESIDISG  
SFNYDSDEPYTGNMNNNDNSGGGIGNNLNANSSVTVGDQKGKKKGLPAKNLM  
AERRRRKLNDRLYMLRSVVPKISKMDRASILGDAIDYKELLQRINDLHNELE  
ATPPGSMITPTSSFHPLTPTPPTLPHRVKEELCPAIPSPKNPSARVEVRAREGRAV  
SIHMFCARRPGLLLSTMRTLDNLGLDIQQA VISCFNFGFALDVFRAEQCREGQEV  
PEQIKAILLDSAGFDGAV

PG26053 MEISSIKWNSEQIGEECNFMNHLEMNSSLKFDGLDDFRNEQYLMSPPEEGTNFPK  
SLSPESYSYTSFLTTTDDHQEPNNNHKNNIEIYERPSKQIKTNPWKSIPINHVSANAS  
SSSSSSSHLISFANFTAQPTDSTRCGDVVIFPVVVPKDEIVSCEDHLNQAYKSES  
YGLDYKISYSELGGVGTTRRSSTRSPLHAQDHVIAERKRRLRTERFIALSAIV  
PDLKKLKDASVLGDAIKYLKHLQERVKLLEEQIKKTKSEETINSSKLFACDDSSS  
CNENSGGCFNKTLPEIEARVSEKNVLRIRHFEKQKGFIPKMLSEIEKHHLTVINSSV  
LPFGGCTLDITIVAQVISTYSELGGVGPTKRSSIRAPLHAQDHVIAERKRRLRTE  
RFIALSAIVPDLKKLKDASVLGDAIKYLKHLQERVKLLEEQIKKTKSEETINSSK  
FACDDSSSCNENSGGCFNKTLPEIEARVSEKNVLRIRHFEKQKGFIPKMLSEIEKH  
HLTVINSSVLPFGGCTLDITIVAQVISTYPNLVTFGQLLLIVDCNYFIILLVNLLYS  
SKKPLQFLQMDDEFCLTLNGLVRNLRTALQ

PG26263 MVQTHKHGYTSTLLANSAKCGRLSKKKTGWDFWVFFHWKPSISTARWGW  
TKSKKSGSSVELMEISHIRGFAELGMEDPYSNIQWPMNSFDELSALSLAAAFGEN  
LHHSFYQPMYDIKPSPEVSFTVTERPMKQLKTNSWSSERTDHTSNTQATYSNY  
TNQFGNVKPKDEVLPKSTTTTLPTDLMTSQGSFENQNYVFKASQGAKRISTGAQ  
LSQAQDHIMAERKRREKLSQRFIALSALVPGLKKMDKASVLGDAIKYLKQLQER  
VKTLEEQRKSTESVGSVELMEISHIRGFAELGMEDPYSNIQWPMNSFDELSA  
LSLAAAFGENLHHSFYQPMYDIKPSPEVSFTVTERPMKQLKTNSWSSERTDHTS  
NTQATYSNYTNQFGNVKPKDEVLPKSTTTTLPTDLMTSQGSFENQNYVFKASQG

AKRISTGAQLSQAQDHIMAERKRREKLSQRFIALSALVPGLKKMDKASVLGDAI  
KYLKQLQERVKTLEEQTRKKSTESVVFVKKYELLADDDKSSSGEQFSGNPVNEP  
QPEIARFSDKDVLRIRHCEKKGVLKTIKAEIEKFQLLIMNSTALFTGTSSLDITII  
ALGMEDPYNSIQWPMNSFDELSALSALAAFGENLHHSFYQPMYDIKPSPEVSFT  
VTERPMKQLKTNSWSSERTDHTSNTQATYSNYTNQFGNVKPKDEVLPKSTTTL  
PTDLMTSQGSFENQNYVFKASQGAKRISTGAQLSQAQDHIMAERKRREKLSQRF  
IALSALVPGLKKMDKASVLGDAIKYLKQLQERVKTLEEQTRKKSTESVVFVKKY  
ELLADDDKSSSGEQFSGNPVNEPQPEIARFSDKDVLRIRHCEKKGVLKTIKAEI  
EKFQLLIMNSTALFTGTSSLDITIIALMDEKFTMTAKDLVKNLRAALKHFPCPYMT  
CVL

PG26507 MHELG MILPTAQTKTTL DGSGETLESIVNQATSHSQNINLAKTDHHQNHPGSTSS  
VVKSYNVKCGENLSHLEMAPGFANKRVRSDYSDQEHADRSACASASATFCRDN  
DTTMMTWAFLESPRSLKTEFVVEDSACHDGENRDKEHETKGETIRS YTTRRSR  
DSDVHNRSERRRRDRINQRMKALQKLVNANKTDKASVLDEVIAYLKQLQAQV  
QMTSVRNMPQIMMPLGMQQQLQMMSARNMPQMMMPLGMQQQLQMSLLAR  
MGMGFGLGMNTGMLDMSTLPQIAIHPNPATAPAPPTFIQPPFVPPMIQSHISSQS  
VPSQGATNTCVPFNDPYCAFLAQVSLKHATVLIYSICLCMISNLKAEDVL

PG26994 MLDGSIDLSSLVLDETLGYYDSSPEGAQSSAAAASKNIVSERNRKLLDRLY  
ALRAVVPNITKMDKASIIKDAINYIQLHEQERRIQAEISELESKKNFLHDFDQD  
QTPFMANSRLKKKKIEQQHSYDSGGRISSSPIQVIEVQALFP

PG27139 MEMMTMMQLDKLSAGHNYHDIYHEFPKFSGGSSSSVESTPPTFHTSFMG  
PVQEPMTQFLEPTFSTPQLKSSSELFLQKTNVNSEEAMREMIFRIAAMQPIQIEPES  
VKPPQRRNVKISKDPQSVAARHRRERISEKIRILQRLVPGGTKMDTASMLDEAV  
HYVKFLKKQVQSLELAGPNRAMGVGYPATMAAAVNMYYSPLARANCQPAQ  
MVGSMQMLR

PG27219 MVRTVKSHHVEEEDDDEFVSRTTDGSFQQGEAKSGDRKANTNRSKHSETEQR  
RRSKINERQILRELIPENDQKRDKASFLLEVIQYIQLQEKVQMYEGTYQGWSSE  
PSKLIPWRNNCGPVESFIDQSQLVRNGSAQEGDIAVTPAVLTNAQNSIDSDFSGE  
AAKATDHGAATQTIPLNIPLPTSLFEGVTTQPPQGSFSDAEHLASQSHSPLWHA

RPCTAECAAPSYTANEPVELKIENGGAISSACSQGLLNSLTHALESSGVDLSQTSI  
SVQLDIGKLTNTGMTSMPFGTKDHENLSPSNQEMSHYGVGSSGEDSDQAHKRL  
RTEQS

PG27746 MFSLNQTDELVFQIHPSIPEQQQEEALVTQDLTLLDQAYGACTVPTTNANSTKR  
HRKKSLLNTATCDNNNIIDESGKKVMHREIERLRRQEMGKLYGSLRNLIPLFIK  
GKRSISDHMHQAVNYINHLQGSIKELDMKRNKLIKMPVKSVISPAGRSGSSSN  
NCFRENNIVTVSPCWCGVEILISIGLMMEEGFHLRSRMEILVNEEGLNVIYAST  
RANQRLHTIQSQLQWIAVWLFKCTSVFREKIFNITAR

PG27847 MSSRRSRSRQSSSGGSRITDDQINDLVTKLQQLLPQITRDSTRSDKVSSARVLQE  
TCNYIRSLHREVDLSERLSELLANTDTNQAAMIRSLLMQ

PG27901 MQPENRPESDFQKFISRNDDFGSYGIPATMSSSDWNVSGSGSGSGGGIIMKD  
DLVAVEDNTAVARALKASNNHKEAEKRRRQRINSHLDSLRTLLPCNSKVATNT  
DKATLLAKVVQRLKELKQSSDIMQLQSFPESEDDIIVVSSNDDQTLFIKASFCCE  
DRSDLIPDLVETLKSRLSPLRAEMVTFGGIRNVLIVSGDKHQSDEVVEFLREA  
LRSLVQRSSSDSRLKRQRRII

PG28173 MGEKFWVKEEDKALVECVLGNEAFEYLWVSASNNVLSEFVAPAGDLGLQQGL  
CKIIEGSNWTYAVFWQVCSSKSGKSALVWGGGHYRESKGGEAEDRKS KGDNK  
KQVLDKLHACFRGSGEDNFAAKFDLVSDVEMFYLTSMFYSPFDKASSPSQSFN  
SSRLIWWSELKSSLEHYQRSFLAKLARLETVVVPLKSGVVELDPFELQTIGTNQ  
VYGNSSNGHWSNDESKLFPQMNQVILGGLNSQALVSNLEQGKDDSLQADER  
KPRKRGRKPANGREEPLNHVEAERQRREKLNQRFYALRAVVPNISKMDKASLL  
GDAISYITDLQSKIRILETEKDEVNNNQKQCAIPEIEFHTTQENAVVRVSCPLDAH  
PVSGVIKTLREHDVITHDSSVSTTDNGEIVHTFSIRTQGGSAEKLKEELSTALSEC  
MQI

PG28660 MSDAYLQADAGSSIMPEVMPWTLPPPVHHGFNPIRDQDPFLLPPPPPCAPYGG  
GFFNRRSFGYDVGPSDHLRLLSDTVLGQVIQPGSSPYGLQAEKGKLTAEIMDA  
KALAASKSHSEAERRRRERINNHLAKLRSLPSNTKTDKASLLAEVIQHVKELKR  
QTSIIAESSPVPTMDELTVDNEADEDGRFVIKASLCCEDRTDLLPDIKTLKALR  
LRTLKAEITLGRVKNVLFITADDQELSGGDQQHPSPPQYSSISIQEALKAVLE



KSNGDESSSGSVKRQRTNISISYT

PG29408

MEMIRSVVGMKGWNYCVFWKLSSEDKRFLELMDCCCAGTENNMENNNNNCGE  
DVELLFPVSSEPVETRVLIPVSVGLIELFVYKQVSEDQRMIDFITSQFKISNIEQQS  
MTNSSFVSVLKAGSSTIVNENYEKELFQPPVSPATMLQNLNLQYDISEDQIPPLHD  
NSPMNFFQQFNHAAENGINNLESANEVDPGMPLNPFKCSAQGFDQEDVDTLQ  
KSMLINSTTTNATAVNNVEPLASRKRQNDDRDSMNRSDSLSDCSDQNDDEDNIN  
DAKCRRRNGNKGPQSKNLVAERNRRKKNLNERLYNLRSLVPKITKLDRASILGDA  
IEYVMELQQQVRDLQNELERNIDLDEGTAADDNHTSTLQSEVLHGNGNGNGN  
GNGNGNGNEVKNIGPKSQHGNGNGNGTPHMGASSGIGTENTNDKVQQMEPV  
EVIQLNGKEFFVKVFCEHKPGGFVKLMEALNFLGLEVTNANVTRVLSLVLNVFK  
VEVKRL

PG29620

MNSSLQFDGLDDFTNEQYLMSLPEEGTNFPKSLSPESYSYTSFLTTTTTDHQEPN  
NNHKNNIEIYERPSKQIKTNPWKSIIPIHVSAANASSSSSSSSSHLISFANFTSQPTD  
SHTRCGDVVISPVVVPKDEIVSCEDHLNQAAYKSESYGSLDYKISYSSELGGVGT  
KRSSTRSPLHAQDHVIAERKRRLTERFIALSAIVPDLKLDKASVLGDAIKYL  
KHLQERVKFLLEEIQKKKSEETVNSSKLFACHDSSSCNENSGGCFNKTLPEIAR  
VSEKNVLIRIHCEKQKGFIPKMLSEIEKHHLTVINSSVLPFGGCTLDITIVAQMDD  
EFCSTLNGLVRNLQTALQ

PG29658

MEFSNSFDGFSENFGFLGIMRGGSSVLDTERGEIVRALVKPAQKGVKAEKALA  
ALRNHSEAERRRRERINAHLATLRSLIPGTNKSSCLDIQMDKASLLAQVINHLKE  
MRRSAAEATESILIPMDIDEVRVEQLEDGSDGDSYSIKASLCCEYKHEVLSDLRQ  
ALEALHLKTVKAEIATLGSRMINLFVLTGCKEKNIKDTEGSQLLAGSVRQALRSV  
LDKFYASEEFSTNATLSNKRRRGGISGETEKTLELTNMLSARKWPSLDDAVIHGEE  
QLPWITKQVDQTALEFGNQVDEWLKQSSYFDSSP

PG29796

MGYMRGRARNLFSTEIWRARARELYSIFMRGRAGLNFALLMEYDVVVVEKILV  
ETVVLVTGAAAPHITLHLALRRELAVCTVPASRCGASFKAVSRAAAWTLCLRHL  
HLPQGILEICLGKTSNDITANRRKNSEEEEEKKKSEREKKKGRKARELEKGIGET  
LDNQKDNYHLLQARIMLGVLELCLHEVFSKLQFGAATRPNSSFFAPQRSVALF  
SRRSALSAPQRRTTVYTVAPQRELAEWFD RDMDMASQDKFEQEKRNEDSLIP

DISSDWRFSSTNLENTSMGLIPNENPMAPTSSQKLAFCDISVQNNTSSSSTLVFRK  
ASLGPPRTGMDGTLVMGWTPPNSMLNGNTLLQTSSRMLPQCLSHFPTGSGFIER  
ATRSMSYSRGGSPMQGPQDVLSGIRLKSIAWEHSQENEMNMIEGSKDVSKSTE  
HGTSGGSPLSNERKSKSFLRSHDEAKQGFRDSSNSDEAEFSSGGGQEEPSVLEBK  
GQRIAAKGHGSKKRKRIAQDTELDQVRGASNPEATKDNSEIQQRDHNPASTT  
NRLTGKHQSQAESLKEEYIHVRARRGQATNSHSLAERVREKISERMKFLQDL  
VPGCSKVTGKAVMLDEIINYVQSLQPQVEFLSMKLATVNPRLDFNIEGLLAQDIL  
QSQPGSSALGFHSDMSMSYHPLHASRPGLIQVGLPSLGTSSDALRRTINSHLTA  
MNGGYNESTAQVPNVWEDDLNNIVRMGLSSDTPLDSQEAY

PG30366 MLPSLNGIAWLEGEEDEGISWAARDNSEGDTCKNLGMSAASLTSFESMLETDW  
FANNTMNPSQNILTNHHPDFNNGNMLLQTMDSSSSCSPAPAFTLDPQSHYPFFP  
PKSSFSLLFNVPFDNSFDLDCEPNFLTNSNSPVLNPELSSGSDFPATRFLPIYDNN  
DNSIGGVFSPIGYDGFQSSSGNALFSNRAKILRPLEVLPPVGAQPTLFQKRVALR  
QRSGEADKLGWGNREDLCKMKRNFSSEDEIDISGSFYYSDELYSRNVNDN  
NNTNDGGIGNKSANSSVTVEDLKGKKKGLPAKNLMAERRRRKKNDRLYML  
RSVVPKISKMDRASIVGDAIDYLKELLQRINDLHNELEATPPDSLITPTSSFHPLTP  
TPPTLPHRVKEELCPALPSPKNPSARVEVRATEGGRAVNIHMFCARWPGLLLST  
LRALDSLGLDIQQAIVISCFNGFALDIFRAEQCREGQDVLPEQIKAVLLDSAGFHG  
AM

PG30998 MSSRRRSRSGQSSGASRISDDQIADLVSKLQQLIPEIRNRRRSDKVSASKVLQETCN  
YIRNLHREVDDLSDRLELLNSTDSQAQAAIIRSLLM

PG30999 MSSRRRSRSGQSSGASRISDDQIADLVSKLQQLIPEIRNRRRSDKVSASKVLQETCN  
YIRNLHREVDDLSDRLELLNSTDSQAQAAIIRSLLM

PG32606 MSNRRRSRQSTAGASGISDDQIADLVSKLQQLIPEIRNRRRNSDKVSASKVLQE  
TCNYIRNLHREVDDLSDRLELLDSTDTSDQAQAAIIRSLLM

PG32671 MAMDALSSNELLFNFIHDTINSSTPLYTCNEDTNFLENAQKPQEYFAASSVINA  
SSSMTTRTSSVEPEPKERLPNLAVQGRKKRRRRPKVCKNKEEAEAQRMTHITVE  
RNRRKQMNEHLAVLRSLMPESYVQRGDQASIVGGAIDFVKELEHLLQSLEAQKF  
QQLQEGGRGSSMNNGSTTTTTDGTAEALIPNPFQFFYYPQYSCSHMSNKFICSK

SNGAVADIEVTLIDTHANIRVLSRGRRLQLSRMVSGFQTVYLNILHLNVTTLDP  
VLYSISAKVQ

PG32830 MKTQTKFQIWKLKDPAIKVLEISEKMLSRVNSVWVMEARKDEEKASWNNHN  
NNNGLENKEEMSSLSAYKSMVEVSEDEWYLANNNITFSPNFTEADNNLLQP  
VDSSSSCPTPASVFSNFDPSQVNYFLPPKPTNSINLNPLSTNPLENSFDLSYETGF  
LGNQALNSLFRGNRVLTFNDLSSHMDTSNLTSNPHFSTTQLLQLAGNSGTM  
SAGFCSSGFQGFELGNGNSLFLNRSKLLKPLENFASIGAQPTLFQKRAALRKNLA  
DSGGNLGLLGNVEGYDGKREVEVSEKKRKTSGDDLDNVSFDGLGSNYDSDE  
FTENNKVEESGKNNGSSNANSTVTGGNQKGGKKGLPAKNLMAERRRRKLN  
DRLYMLRSVVPKISKMDRASILGDAIEYLKELLQKISDLHNELESTPPSSSLTPSS  
FYPLTPTPTLPGRIKEELCPSLLRSPTGQPARVEVRLREGRAVNIHMFCGRKPG  
LLSTMRALDNLGLDIQQAIVISCFNGFALDIFRAEQCKEGQDVHPDQIKAILLDSA  
GFHGMV

PG32841 MDIDLLKSAPEDQIEMLMMMQMDKLSDFCGGVDSNDVVSEMPPEFTPGKSTS  
TNKIGHLPQIIDQNSPTFINLPSTISFTGSPVQEPALPFLSSSNMGRWRNNGEDQ  
FPTQAQKRNSMAAMREMIFRIAAMQPIQNDPESVKPQKRRNVKISKDPQSVAAAR  
HRRERISERIRILQRLVPGGTKMDTASMLDEAIHYVKFLKNQVQSLERAAVNR  
VAAAGIGFPVPMCSGSFFPMEQATKGYHQSSAAQNVQQGVPNFR

PG32851 MEDRVPKVAQNLKWTTVREKYLGFGFCYFCEGDMNMA SPDKIEPEKRDDDS  
KNYHAPNNSDWRFSNNLTYSMGLIPTENPIAVCKGDLISSLCSASMVDSFC  
PNIWDQPTNSQNMGFCDVNVQNNASSSTLGFRRKSLGPPRNDLERALDMGWT  
PPNSMLKGSMLLPTSSRMLPQSLSQFPTDSGFIDRAARFSCFSGGNFGDMVNPFSI  
PESMSPYSRVAAPMQGAQEIFAGSRLNSTSGGSHENEMSMVEGSKDVSMSIEH  
GASGQSPLNNEGNSIEFVGSRDEAKQGFHESGNDSGEPEFSSGGGQAEPSILEGT  
GGGTSARGHGLKKRKRIGQKDELDQVRIASNPPEAIKQNSEIQKGDQNPTSTA  
NMPGGKHCKQGSQASDSLKEEYIHVRARRGQATNSHSLAERVRREKISERMKFL  
QDLVPGCSKVTGKAVMLDEIINYVQSLQRQVEFLSMKLATVNPRLDFNIEGLLA  
KDIIQRAGPSSALGFHPGMSLPYAPLHPSQPGLIQAGLPGMGTSSDALRRTISSH  
LTAMSGGYKEPTSQAPNVWEDELHNIVQMGLNSSISLDGQDLDGSLPPGHMKA

EL

PG32981 MEYKGHDFLEELLSLRIDDPWELATNNIPKGVNDFYITNVDTFLENPFQNYCF  
DEFKPFDRQTFNCSPEFYTPFGDEALSAPEVTDSSSTNKLDTSQMFQEDCSFMSI  
VGDLEVEASATCCKMETIQSPEIPIFNMGIWSEKTTQVKKLNGQGQPSKNLMA  
ERRRRKRLNERLSMLRSVVPKISKMDRTSILGDTIDYMKELLERINNLQEEIEVKP  
YDLQQLISLKSIFKDVKPNEGDLLRNSPKFDVERRNMDTRIEICCAGKPGLLLSTV  
TTLEALGLDIQQCVISCFNDFAMQASCSEEMEQRGISSADIKQALFRNAGYGG  
CL

PG33143 MDWYSCNSKKSDFGFGHFLVEQFWGSLGGNLGSGSMLNSHTLVLDGEKDEL  
VKAPGGVEKKDGVLEVKDVAALKSHSEAERRRRERINAHLDTLRGLVPCAGKM  
DKATLLAEVICQVKQLKNSATEASRGVLIPMDADEVRVEPLDESSRDGTYFLAS  
LCCDYNPELLSDVKKALNALQLNIVKAEISTLGKRVKNVVFVFTSGRGNGNAEEQ  
QLLLNSVRQALSSIVDKISIFAKNGAEQV

PG33184 MSIENNMQTTYLLPELIFQEDSHEFVDTNFAAGSAASPEDIFSILEALEGVSSDQL  
NSLTPVLDHHDETTFFGPKLEAAGVNQQQEESTSHATTTTTLATQKSTSSALVD  
LEELETELEEEEEAAKNCSPKTKRRKLSKAAAKGEEELDGQQKISHIAVERNRR  
KQMNDNLSVLRSLMPSFYVVRGDQASIVGGVVDYITELQQVLSLEAKQRKLI  
YNEVLSRRQQQLVSSPRLTSLPISPRKPPISPRLVVPISLPTSPTTPQPTSPYMNQ  
HQTSLHYQLPYLSPTNSMLNSSLPSLSSSSSSSSCSTNSIDHANELVAHKSVA  
ADVEVKFCGPNVLLKTISPkipGQVLNIIALEDLSLEILNVSLKTIDELTMLNSFTI  
KVTSK

PG33513 MGGTMWSEEDKAMAAAVLGTRAFDYLISSVSAECSLMAVGNDENLQNKLS  
LVDCPNFSNFSWNYAIFWQISRKSGDLVLGWGDGSCRELREGESEVSVILNLR  
FEDEKQQRMRKRVLQKLHALFGGSDEECYAFGLDRVTDTEMFFLVSMYFSFPR  
GEGAPGKCFGSGKHVWLSDALKSSTDYCFRSLAKSAGIQTIVLIPTDVGVELG  
SVRSIPESLDLVQSITSSFSFLSVSKPKLMAAAPVVSEKEDGNTQFSNLDVVEGP  
RITKIFGQNFNSTRSQFREKLAVRKAERPWDACSNGNRSPFPNARNGLNGSNW  
AQFNNVKQGNTVETYSPTPANNLHELLNGGAREEFRFNNFKTQKPAQMIDF  
TGAMTRPPVICRPASGESEHSDVEVACKDGMGLADAKRPRKRGRKPANGREE

PLNHVEAERQRREKLNQRFYALRAVVPNISKMDKASLLGDAIAYITELQKKVKD  
LESGREKIGSTSREASSNSEYKNQVSNIEVEAAHDEVTVRVTCPDLSHPVSRVIEA  
FRETQVTVTESKLTAGNDTVFHTFVIKSEGPEELTKEKLVAAFSREANSLQPLSS  
VG

PG33622 MALARIARSGLRRSGATGNYASQKDMPEYEGVSTRKYSLPSVENDKSCGSLSYLS  
NIKRADHVSFWSRGINVTPHYQFAHAERVVEESDSEYENQKYPSEATKPGKKP  
RVVVLGIGWVACRFLKGLDTKIYDVVCISQRNHMVFTPLLTSTCVGTLEFRSVA  
EPVYCETVGDAGLPHEHYRFKVA YDKLIIATGFEPLTFGIKGVKEHAYFLRERRR  
DRINEKMRALQELIPNCNKVDKASMLDEEIEYLKTLQLQVQIMSMGAGLYMPP  
MVAGGWKVRQFWSGSDNWDRRSRIGGGMIGVWRERNGGGRGRIMGTRRRMT  
LGYCSSNIMHKIKELISVLDQRKDESEICTFKGVAKYFQEVFSELVQHGHRLHM  
MKKKFGKSPNISVPKSRFMDSSVFFAGDSSVLLMDAIFGNLMFICLLLLGTRVL  
PKASVVSRLRETVSTTCLTILGIKFCYVYGRQGTKL

PG33853 MDNLGWECSPVVTNVESSWSNQHQIAERFIATDSNCSGFGTGKIFIFIQRLHKI  
IDHEPSDHDVHSNSKTESQMVRHLVPPLDSIKVATTLNILQHQEATRLAANTML  
AKSGAGTSWGEALRRPHMMVDPLSGLMADFGMPQDGNKAAAVSTTTASLES  
DCLLSATNSNTDTSVEDDGINSVLFSDHSKNLWNNFGSNNISSGDSGMNNSSRI  
KYHNQYCSRWMNEIDKSVPNSTTKRRNEGDSWNKGGGFQLISENPPQIIKKARL  
EKRPSSSNISFKQPSNSSITNACVEEPDSEAIQMKDMIYRAAALRPVNLGEEAVE  
MPKRKNVRISDPQTVAARQRRERISEKIRVLQRMVPGGNKMDTASMLDEAAN  
YLKFLRSQVKALES LGHKLDFVNCPIPTLNPNHFPNSVIPFNHSIFPMQTTHFS  
LPKP

PG34217 MVLSYYSNRGPLQYHHNQELTQPELLPELLNFHDNYLLSDTCIDPLFDQKNFFY  
SENTLTPSPPPPPPPQLFESYPYKRVKTQEDFYYSDIINYDYDVFPNPPLL  
PEFFPELVLPPEFQASSTILPQVYSCGSISNVEQGTSNVKKASGGSLSAQSIAARH  
RRRKITEKTQELGKLIPGGQMNTAEMFQAASKYIKFLQAQVGILELMGSTDDQ  
ENKEALHSPQLALVTSPLVQEKLYSAEKCLVPRKFVETLAEKRQLQSNPQLIKD  
IIQLL

PG34234 MVRTVKSHHVEEEGDDDEFVSRTTDDGSFQQGEAKSGDRKANTNRSKHSETEQR

RRSKINERQILRELIPENDQKRDKASFLLEVIQYIQFLQEKVQMYEGTYQGWSSE  
PSKLVPWNRNSCGPVESFIDQSQLVRNGSAQEGNIAVTPAVLTNAQNSIDSDFSGE  
AAYKATDHGAATQTIPLNIPLPTSLFEGVTTQPPQGSFPDAEHLASQSHSPLWHA  
RPCTAECAAPSYTANEPVEPKIENGGDISSACSQGLLNALTHALESSGVDLSQTSI  
SVQLDIGKLTNTGMTSMPFGTKDHENLSPSNQEISHYGVGSSGEDSDQAHKRLR  
TEQS

PG35448 MDQSDPFESALSSIVSSPANSNPGIPNNGENFVLRELIGRLGGICNSGEISPHSYIG  
GNNSTNTSCYNTPLNSPPKLNLSIENQIRGNLKIPGNQLPFSTDPGAERAAKFSC  
FGGKNESKFPPKTEFAGSQMGLQENRDGFLQEGIEVSDKKFHRFSRSSTPEKDSM  
EESSVSEQIPGGEIVKKSQSDGNRKRKSIPRGKKEIPSAPSAKESMVVAENES  
NSKRSKENEGNGSGKVTGEGNQKQNKDSAKPPEPPKDYIHVRARRGQATDSHS  
LAERVREKISERMKFLQDLVPGCNKVTGKAVMLDEIINYVQSLQQQVEFLSMK  
LSTVNPRMDLNMEALLSKDIFQSRVSLPHNIFPADSSAQAFPYAYQSQQGNLHS  
NMPNGTKNPLSMNPLTAAILRNTGMQMPSVDGFHEAAASQVPTFWEDDLQSFV  
QMGFGQNQHEILHGSNSTSSHMKVEI

PG35697 MDPPAIMNRGAFRSGNAAPYNLAEIWPFFHGQNLGEFNDNPNRGDDPMVLDQR  
GERKRSQDDDSAAGASTSCAAIDMSDSDSKRLKVSISRDENLASKAETEANS GK  
QAEQSTKPSEPPKQDYIHVRARRGQATDSHSLAERARREKISERMKILQDLVPGC  
NKVIGKALVLDEIINYIQLRQVEFLSMKLEAVNSRTNPSIEGFPSKDFGQQTDF  
MAGLTFGSQAPREFSRGSSPEWLHMQIGGNFERST

PG36060 MNALPEMLHCMNTATNIAGR TDMSVFERQRARMKWEEDQQQQQQLSFFSGN  
ELNMFSIPAAQAQQFQPLIGNDSGFSGLVNRAVKPDGM DNGWPDNGKFGVDD  
HLGYGYGNIIEDEGIKEKKIKGGAEEGDSKIRTEQNKCNKRETSNDT SKDNSKI  
SEVQKPDYIHVRARRGQATDSHSLAERVREKISERMKYLQDLVPGCNKITGKA  
GMLDEIINYVQSLQRQVEFLSMKLA AVNPRLDFNIDNLFTKEVKTQISQVAIKNN  
YIQIFVTNSVFHQHQMFPACTSNFPTIGLSP EMANPAYFQFNPLQQA VTTCCGLDL  
GVNPPDMALTRTISAPVSIPETFVDSSGFNFNL YYTKYSPLQLGT LIYKTSITRNFN  
KEDQQHIHLSYLQSFKVEV

PG36640 MANNPGDGTADD FLEQILGFPAYAGTDSNLAGNGAAAPMMLKLN SGDGSGQL

SGGAGVGGGFHFPLGLSLEQKGGFLKMDEASGSGNRFREDVDSRISSSVKTFG  
HGQPMHNTLPAMPHPPAIRPRVRARRGQATDPHSIAERLRRERIAERIRALQELV  
PNVNKTDRAAMLDEIVDYVKFLRLQVKVLSMSRLGGAGAVAPLVTDIPISSVEV  
MDIIKYFNGKAVPSHKCC

PG37017 MSDAYLQAAAAGGNSRMFPEVLPWTLPPPDPFNPVHFPTNPIRDHDPFLLPPSPS  
PYGGLFNRSRSGYEGPSNSDHLRLLSDTVLGQVVQPCSGPFGVQAEKGKLTAQ  
EIMDAKALAASKSHSEAERRRRERINNHLAKLRSLPSTTKTDKASLLAEVIQHL  
KELKRQTSIAESSPVPTMDELTVDNESDEEGRFVIKASLCCEDRPDLLPDLIKTL  
KALRLRTLKAEITTLGGRVKNVLFITGDHDQELNSGDDDDDDDEQQQQHYSIS  
SIQEALKAVMDKTNGDESSSGSVKRQRTNINIL

PG37191 MEPTSTATEVRSASCNQKTEEVGVESLQFGEEIQTLMSPPETGSSFTALLELPTN  
QAVKLLHSPEKLSGEVWSNGPIEHPKPYHFTPMFPSNTALVDRASKFSVFATTEN  
SPEPNSIPLNYVKQEPVESDSRRNSSPGLSDSVVPNNDQKSSKRKEREKVKGPV  
KRKNTENENSKDREKLPYVHVRARRGQATDSHSLAERARREKINARMKLLQE  
LVPGCNKVRCCFKLY

PG37222 MEKEGNTFPPTWNSTQFGMEIQNSELNSTSEQIPNCFNPNWENPIDQSDPFESAL  
SSIVSSPTTSHPGISGENIVLRELIGRLGSICNSGEISPHSFIGGNGNHSTNTSCYTTP  
LNSPPKLNLSMMDHQIRGMGNQLPFSTDPGAERAAKFSFCGGINGQTGENESE  
FPHKLSRVSSCQSFKVAGSQVGFQENKEGFLQEGIQASDKKFSRFSRSSTPEKAK  
LGDSMEESSVSEQIPGGEIGIKCKSDANANANAKKRKSIPRGKAKEIPSAPCSKDA  
KAAAENEESDTRKSKSNEGNSNGKDEAKENGIQKQRKDNSKPIEPPKDYIHVRA  
RRGQATDSHSLAERVRREKISERMKFLQDLVPDCNKVTGKAVMLDEIINYVQSL  
QRQVEFLSMKLSTVNPRMDFNVEALLSKDIFQSRGTLPHNIYAVDTSAQAFPYT  
YQSQQGSNIHNNIPNGTETPPFMNSLNAAIRRNTVLQLPSVDGFNEAAAASQVSAF  
WEDDLQSVVQMFGGQNQPESFHGSNAATNMKVEL

PG37235 MEEFGGSSSSCSPVSLSKELMSTLQQLQYIVESQPHCWSYVIFWQTSNDDSDN  
GRRLVLSWGDGHFRGPTKHILPIDQINHTIDGSIDGDFMDAEWFYVMSLTRIFRA  
GDGSAAGKASSSGAHIWLCGTDQLRFSECERAKEAQVHGFHTFVCFPTCSGVLE  
MGSNIIISENWSLVQQVKSFLGSDLSGLVPKQPNPSNVGSCSYLDMEIPEFDVYD

DRLVAVGPSTPHVEKKNAGNKRGRKPIAGQDMPVNHVEAERQRREKLNRFYE  
LRAAVPTVSRMDKASVLADAVSYINELKLVDELESQLEFRVLKKSSEGGADT  
VENPNSSTTTTTTRTSADEKMPESKGLTLEVEVKKVGSEAMNIRIQSDNADYPGE  
KLMKAIRELELHVHHASMSNVNGSIMLQDVVIMVPEEEADGDGVLRSDELRS  
ALLRAMNR

PG37305 MDPNPNIQFWIFAIRQIYLRKLVGFGVPGDVGNFRASNRTNTEASSKTSRLSSYM  
TFSSGPSSCSSVMPITENGNDNVGTSSQQNGHLGCGQNGEQPSGGYLPNSPND  
TSNNLKRNGDSEVKMFSNLNGFDSQNGDSKHYSGLVHQLSSPSTSVEMATIE  
FRPFQGGSTPCKIRAKRGFATHPRSAERVRRTRISERMKKLQDLFPNMDKQANT  
ADMLDLAVESIKDIQKEVQTLNEIRAKCTCSSKRIQTSPTARPALCKDY

PG37445 MEKEGNTFPPTWNSTLFGMEIQNSELNSTSEQIPNCFNPNWENPIDQSDPFESAL  
SSIVSSPTTSHPGISGENIVLRELIGRLGSICNSGEISPHSFIGGNGNHSTNTSCYTTP  
LNSPPKLNLSMMDHQIRGMGNQLPFSTDPGFAERAAKFSCFGGINGQTGENESE  
FPHKLSRVSSCQSFKVAGSQVGFQENKEGFLQEGIQASDKKFSRFRSSTPEKAK  
LGDSMEESSVSEQIPGGEIGIKGKSDANANAKKRKSIPRGKAKEIPSAPCSKDAK  
AAAENEESDTRKSKSNEGNSNGKDEAKENGIQKQRKDNSKPIEPPKDYIHVRAR  
RGQATDSSHSLAERVRREKISERMKFLQDLVPGCNKVTGKAVMLDEIINYVQSLQ  
RQVEFLSMKLNSTVNPRMDFNVEALLKIDIFQSRGTLPHNIYAVDTSTQAFPTY  
QSQQGSNIHNNIPNGTETPFPMNSLNAAIRRNTVLQLHSVDGFNEAAASQVSAF  
WEDDLQSVVQMGFGQNLPEFHETKPKKKRMKKKHQKPRLAAVCDVVTWLR  
NQKTFCKIPSGLEN

PG37838 MKSVKGHQEEEEEDYEDFGSKKDATTSTNSKDGKNSDKANATRSKHSVTEQRR  
RSKINERFQILRELIPNSDQKRDTASFLEVIEYIQYLQEKVQKYEGSYQGWSSEP  
TKLMPWRNSHWRVQSFVGNPQAVKNDSPGSGTFSGRFDENNVTIIPTMHTNPEN  
PVESDLSRDASCKPMDQQPELANKGMMVPMPLQASMAVPVQSDGVFSLPLRRP  
VSDAQSTECPIQGDVNLQDDLTIEGGTISISSVYSQGLLNTLTQALEGAGVDLSQ  
ATISVQVDLGKRANRGLNSGITLAKDHVDPSDSQPVGHFSEADNGEDTDQVQK  
RRKI

PG37858 MLRAEAEIMELLWQNGEVVTHSQTQRSLKSHLAVGGASAEQREIRSEETAA



NHQLFVQEDEMASWLQYPLDDSSFRDFYADLLGPAAPSAPVATAVPQPPQA  
VTLPIPPQRLVEPSMESPQQRYQNFSHFSRLKGRIESGPSSSNKAGKVSTVED  
SNETLLKTGLESRLVWGADNTPLVSGGNIGYSIPAAAANTSPVACELTVSSSPGG  
SGASAASAEPTHKLTGATATATEDRKRKAIEIDDGESQSEVRTTPHYKYVFAVF  
HVHSSPSMERGASPSFIQSDTSSGGMLEKKDVESESAHAKKHVRGSTS AKRSR  
AAEVHNSERRRRDRINEKMKALQELIPRCNKSDKASMLDEAIEYLKSLQM VQ  
VYLLTGICQLFIPLVSFALQIVLLLSAII SV

PG37971

MTDYRVPTAAMNLWSTTTTDDNTSMMDAFMSADLTSFWPSPTPPPPPPQSSSTS  
TSTAAAAVFNQESLQHRLQSLIEGAKESWTYAIFWQWQSVSGDIDYSSSQSLLG  
WGDGYYKGEDKEKQLKRKPTSAAEQAHRRKVLRELNSLISGSQSPDDAVDEE  
VTDTEWFFLVSM TQSFVKGAGLPGQAFFNSSPVWVTRAERLLSTPCERARQAQT  
FGLQTMVCIPSNNGVVELGSTELIYQSSDLMNKVRILFNFN SIDSGYWPVXWSVP  
SEPNESDPSALWLTDPSPLPNEEIKEIPMNSAKPPQIGFENHSFSTLTENPSTSSVIN  
VQNQHKSQSQQNGNITRELNFSGFDFGSSNVRNGNSNSHVCKPESGEKLN F  
GESKRSCSGNGLFAGHSQFVGIVEDSKKKRSSSRGSYHEEGGILSFSSGMILPS  
SGIVKSSGGGGSDHSDLEPSVVKEAIVSQVVDPERKPRKRGRKPANGREEPLN  
HVEAERQRREKLNQKFYALRVVVPNVSKMDKASLLGDAIVFINELKAKLQTSDS  
EKDELRSQLESKKELASKESRYSSQKAADKDLKISNDHG NRFINLDIDVKIIGW  
DAMIRIQCSKKNHPAARLMTALEEMDLEVSHASISV VNDLMIQQATVKMGSRF  
YTQEQLRVALAAKVSETR

PG38201

MIVNPEMFEEGSSCFDSTPMQYQTLAEDGLSLNIVPNCNPNFPMEEQVLSYSQQ  
DAAAAAASMELELQHQMGLMIENCYNPNNNIDQTHLMQDPNHQANWENHQ  
EMNYGHYSQIQDVHNSNSHHQSFINSTETPYPQTPDLLNLFHLPRC SSSLLPDST  
ISFTNLP GPD TGSNSSVLYDPMFHLNLPPPPMFREMFQSPNGYNLPPTQTGSLF  
DGMEERENSGEFDTGVLEFSRDMKCFAKGRGCKNTKHFASEKQRRVHLNDKY  
AALKKLVNPSKPDRASTVGD AIDYIKELQRTVNEFQVLVEKKRYSRERLIRRHK  
TEDDSVLEVETTNVKPRGDPEQQA YYGSSLRSSWLQRKSKNTEVDVRIIEDEVTI  
KL VQKKRINCLLFVSKVLDELQLDLQHVAGGLVGDFYSFLFNTKINEGSSVYAS  
AIASKLIDVVDRQYVASQPANGYMYDASYGWINCTFPSTSSY

PG38302 MSLVSLGSFCMYPAGEFGSICSNLMLFGHLYLPILEYLKRVSEIAPFRGFVGLLGF  
GSKLQVQKLTMGTEDNGDMRFQHRDGDGTMNRNPLSEKVAEMGMSSGSIFKG  
SNGAESYFGSGWDPLVSLSQSENFGAHNGFSNPAYPVVMENQVMSTTSHLVHY  
QSDSGGLGEMVPKLSCFGSGSFSEMVSFGLSECGQMSYSQNKEGGTGKALLIG  
TDSQEECRNSEGKVS PNGKKRRRTSES RSPFNPNK NTEVEQQEDPSGDSLEQDD  
KKQKIEQNVNANLRGKQTSKQAKENS DSGDAVKDNYIHVRAKRGQATNSHSL  
AERVRRERISERMRLQELVPGCNKITGKAVMLDEIINYVQSLQQQVEFLSMKL  
ATVNPENLIDIDQILSKDNAEVEQQEDPSGDSLEQDDKKQKIEQNVNANLRGKQ  
TSKQAKENS DSGDAVKDNYIHVRAKRGQATNSHSLAERVRRERISERMRLQEL  
VPGCNKITGKAVMLDEIINYVQSLQQQVEFLSMKLATVNPENLIDIDQILSKDILN  
SRGNNATILGFPLRPGHPFPQGS LPGAIPSTTPPFHSM PQKEKLRLRLAKMIVSIDV  
VE

PG38503 MEDFGGSSSSSSSPVSLSQEHVPTLQQR LQYIVESQPHCWSYVIYWQTSKDPDNG  
ILLWSWGDGHFRGPTKHSTLPKDQINHTIDGSIDGDVMDAEWFYVMSLTRIFRAG  
DGSAPGKALSSGAHIWCGTDQLHVVECERAKEAQLHGFQTFVCIPTCSGVLEM  
SSDITISENWSLVQAKCLFGSDLIGLIPKQPNPSNVGSCSYLDMEIPDFNLHDQF  
VAVGSVTPQVEKKNPAKKRGRKPILGQDMTVNHVEAERQRREKLNSRFYALRA  
AVPNVSRMDKASVLADAVSYINELKAKVDELESQ LLEFRASKKSGKAESAGTD  
TVENPNSSTTTYVDQKMAESTPLVDVEVKMVGSDAMNIRIQSDNSDYPCAKLM  
KAIRELELHVHHASMSNVNELIMLQDVVIRVPAADGGLRSEEGRLSALLRAMEH

PG38504 MEDFGGSSSSSSSPVSLSQEHVPTLQQR LQYIVESQPHCWSYVIYWQTSKDPDNG  
ILLWSWGDGHFRGPTKHSTLPKDQINHTIDGSIDGDVMDAEWFYVMSLTRIFRAG  
DGSAPGKALSSGAHIWCGTDQLHVVECERAKEAQLHGFQTFVCIPTCSGVLEM  
SSDITISENWSLVQAKCLFGSDLIGLIPKQPNPSNVGSCSYLDMEIPDFNLHDQF  
VAVGSVTPQVEKKNPAKKRGRKPILGQDMTVNHVEAERQRREKLNSRFYALRA  
AVPNVSRMDKASVLADAVSYINELKAKVDELESQ LLEFRASKKSGKAESAGTD  
TVENPNSSTTTYVDQKMAESTPLVDVEVKMVGSDAMNIRIQSDNSDYPCAKLM  
KAIRELELHVHHASMSNVNELIMLQDVVIRVPAADGGLRSEEGRLSALLRAMEH

PG38698 MAVKKMNHNASERDRRKKINS LFSTLGSLLPASDQTKKKLSIPNTVSRVLKYIPE

LQKQVERLVGKKEELSSKISKQGQQLIHLQQQRIPNSLYTVSASLMMGGDVMIQI  
SDAVPTTTTRIDFINP

PG39433 MDQFNNAFGQSTEAPIQSVPELNQRPNSTRLHSDSRLEAGPKECDVARKVQKA  
DREKLRRDRLNEQFMELGNTLDPDRPKNNKASILGDTIQVLKDLTAQVNRLKAE  
YASLTEESRELTQEKNDLKEEKASFKSDIDNLLQYQQRYRAMFPWGGMDHSV  
VMHPPSYYPVPMPIPPGPIPMHPSLQPCPFFGNQNPALVPNPCSTFPYLPNTII  
ERQSAHYVSPVPPSSRSRVSSKQDSRNRSSNQGESKTDKYEDSNDVATELELK  
TPGSTADQDSSLGKRKSKKSPRKESLSAGNSSSRCSSSHTVQSSSDSVVVGGM  
RAEDTERGQI

PG39516 MQPENRPESDFHKFMISGNDDFGSYGIPAMTGSGGGIIMKDDLVAVEDNTAVA  
RALKASNNHKEAEKRRRQRINSHLDSLRTLLPCNSKVATNTDKATLLAKVVQRL  
KELKQQSSDIMQLQSFPESEDDIIVSSNDDQTLFIKASFCEDRSDLIPDLVETLK  
SLRSLPRAEMVTFGGIRNVLIVSGDKHQSEVVEFLREALRSLVQRSSSDSRL  
KRQRRII

PG39699 MEKEYFFNAEFPQLHFHPSLSALEMPNGFHNPFDKLMQYSQFESALSSMVT  
SPAASNSAADTFAIRELKGKLGITIFNTGEISPEFLQGASYIGGGDNPNSSCYNTPT  
DSPPQLHLPIMSHFVKENLPNLGNPIPTNSALPALSADPGFAERA AKFSCFGSRSF  
NGRTSQIGLNNAEFQYRSSLLMGNGKLPRVSSSFLKEAGSPMGIQVNKNSVQT  
QMEMRSGNGSASASGRKFSNLSGSAANSNEASSVSEQNPSPGENSLGTPKELNYR  
KRKGVSRGKAKEAALSQSANAKKEAEGDDNLNVKRSKMTGGGGSVKTEEETK  
IGAEEDQKQANNDQKTPEPPTYIHVRARRGQATDSSHSLAERVREKISERMKL  
LQDLVPGCNKVTGKAVMLDEIINYVESLQRQVEFLSMKLATVNPRIDSRLLSKDI  
IFQPNGTFPNQMWQVNFSSASAYYGHQAQQQIPQVHKSVEHATLCRNLMGHL  
DGFGEGLSQFPAFSEDEHCSNGFW

PG39922 MVTSPAPSNSATDAFAIRELIGKLTICNAGEIAPELMPRTTYNNSPNTSSCYNTP  
LGSPKLVPIMNHLVKENLPNLGNPMPMNSALPALSTDPGFADRAAKFSCFGS  
RSFKGRTSPIGMNNTFQYRSSGLLMGNGNLTRVASSPSLKAAGSPMGIQQNKN  
SVQTMEMRSSNGTVSASDRKFSNLSGSVANSTEESVSGQNPSPGENGLRTPNE  
LSSRKRKVSRGKAKETA VKEGEGDDSSVKRSKMTGCSGNNNGGVKTEEETN

RGASDEDQKQANNQKPEPPKDYIHVRARRGQATDSHSLAERVREKIGERM  
KLLQDLVPGCNKVTGKALMLDEIINYVQSLQRQVEFLSMKLATVNPRLDVNMD  
SLLSKDTFQSNGTMPHQIYPVDATASASAYYGNQGLRNPQVHKSVEPLDQTLCR  
NLCMPLDGFGEGLPQFPFSEEDDLQSIVQMGFVDKRLCESVKHAVSMKLSIVG  
NFQVNCHYLNPEFHAL

PG40693 MDDLVSSESSSSSLVSLSQESHPTTLQQRLEHILGSQPAADSWCYAIFWQTSTD  
HNGRLLLSWGDGHFQGTTPPKHPPTNAKLERKKAIRGLFHALLNDNPDTECS  
IDTDEDGDVTDAEWFYVTSLARTFPGGEYSEAFSSGTCVWLDGVDQLQAKL  
ERVREAQIHGIQTFVCIPTCYGVLEMGSNIALKQNWSLVQQANTLFGSDVSGFIP  
EKEPNTSNNNINVINNGFLDGSNFFADIGVKVGTGSQEEESINLEAAKQEESEHS  
VSVFHEFVTAGGAQASVEKRAPKKRGRKPWRDMAMNHVEAERQRREKLNRF  
YALRSVVPNVSMDKASLLADAVSYINNLKAKVEELESQVQRESKKARIVVE  
AAGDTTIDNNSSTTTCINDIPNSNNPVLEVEVKMVGPDALIRVQSQCNYPGAKL  
MEALRELELQLHHASMSRVAELMVQDVVIRVSDGLRTEDALKAALLRALDH

PG40733 MDMSHARCFPELELQGMDDCENNFFHLLQNDCTNTNTTTTTTKTQQLVTASTG  
NYQHQRPLFCEGSFIKTDSQQLYSSSGEWMKPKKEEVVLYNDDQLFLSFPFN  
WNTPAGRHITSTKSRAPHHTTKDHIMVERRRREKIRQRLIALSAILPGLKKMDKA  
SVLENATKYLKQLEERVKALEQQIKKKKSFESVVVVKKSQICNDDDDDDNNSHD  
HELSDAGHDQGLPEIARISDKSVLIKIHCQKQTSFLQKLLAQVEKLHLTILNISSL  
PFGNYAMDITISAQMDAEFCLSQKDLIRVLVRSFAVQTMEHECITNFMTMFVYK  
NYNSEIIIIIP

PG40819 MELEAIVFQERLGYSCSNKNLYNLSGGDWSSHDLDLKETQEKLGLSDIVENQA  
ENCLYNPFSHEELPHLEQWICHSGIEPEMVNPQEFQPSETSTVMNGKCKRRRSK  
SKKKMEDIENQRMQHIAVERNRRKLMNEYLSVLRSLMPDSYVQKVDQASIVGG  
AINYVKELEQQLYLSGQSPLNQDFLSDHTGSSSTFAEFFAFPQYAISSSKRDNST  
AILED SMADIEVIMVESHANIKIRSQKRPKQLLKLKVGLESLRLTILHLNVTSDQ  
IVLYSLSVKVEADCKLYSIEEIATAVNQMLARI

PG40879 MEELLASSSSSSSLVSLTEQYPPPLPLPLSSTTLQHRLQYL VETQPADHSWSYAIF  
WQASSNDQLVLSWGDGHLRGTTKNTPVPLKESKKPVRLFLHALLNDNPDASI

VDSVTDQAQWFYVSSMARTFPGNSSFGGVPWKAFSSGAHIWLSGPDQLGSFEC  
ERAQEAQIHGIKTLVCIPTSSGVVEMGSTVPLKENWNLVQQAQSLFESDLAGLIH  
KNYVDDPSNNNMNGFEFDRSICFSDINGLFTSLQDQEDSINLLDAKLLDSEHSDS  
EFQFAAASAAGGGAASTEKRAPKKRGRKPCGRDTPANHVEAERQRREKLNRR  
FYALRSVVPNVSMDKASLLADAVSYINDLKIKVEELESQKQESKCLKVEAAA  
AAAGAASDTADNNNSTTTSDVQATPNGNTTTSVPLDIEVKMVGPDAMIRVQS  
ENSNHPGAKLMEALRELELQVHHASMSSVKELMLQDVVIRVPDALRTEDALKA  
ALLKVLDH

PG40902 MDIDFFKSAPEDQIEMLMQMMDKLPDFFGAYNNHVSEVPAMEYSNTQSGS  
SSTNTDTNNNSNIGGLPQVVESSSTFMHQPTCISFTGSQSVEESAELSFLTSSSN  
PGRWRNGGEINIPSAQKRSSMAAMREMIFRIAAMQPIHIDPETVKPPKRRNVKI  
SKDPQSVAAARRRERISERIRILQRLVPGGTKMDTASMLDEAIHYVKFLKNQVQS  
LERSAVNRHATTAAGIGFPPMSSGSFIPMQQAIKGYQLSSAQNVQHYLDA

PG40922 MARYVNSTKRIRVTAMANNPGDGPVDDFLEQILGFPAYAGAEPNLTGNEAAAA  
APMMLQLNSGDGSGHLGGGSGAGGGFHFPLGLSLEHGKGGEFKMDDEVASGS  
GKRFREDVDSRVSSPANMGFHGQPMHNTLPAIPHPPTIRPRVRARRGLATDPHSI  
AERLRREERIAERIRALQELVPSVSKTDRAAMLDEIVDYVKFLRLQVKVLSMSRL  
GGAGAVAPLVTDIPISPVEKEGSEGRNQPAWEKWSNDGTERHVAKLMEENVG  
AAMQFLQSKALCIMPISLASAIYHTQTSDTTTLVNPETKF

PG41655 MNPLYDQYELKSSYSHEYSAYPTSNPQSLPLDNMMSNIGIERFKTEYDSSFYSK  
QMISTSNASTSNSTNFIAFGYPNSVPPLEQHGFYASLNLPKKSDELVPQEIFNFS  
HKMQSLSYNKNYASEFDEEIKRIDSSINRSPLQAQDHVIAERLRREKLNKLFIAL  
SAHIPGLKKLDKASILKDAVEYIKQLQEREKVLEEEACKQSEPIVTKKKTLMLS  
EDGDDTHSSQLPPLSDIKARVLGQNVLIRIHCQRPKGSSIVLKFLDELEKLHLTIIN  
CCVIPFDNSLDITITAQIDAKFCITTYELVEEVSAFSLV

PG41742 MEYLGWECSPNESSWWSNQCEIGDLSSENCCGYKTEDDILNPIQQLLIHKRTSV  
GDDYPINSEKLVNQMVQHHLAVPPILDSIIVASTINYSRQHEQRQLEAIRLASANN  
MMPVSESGAACTSWESEADLCNSNSPNSVKMMPDFGIMPQDMIKAAA VSTFT  
TTASMDSLDCLLSATNSNTDNTISAHQDDGINSILFSQSHCKNSVLSGDSGKGDD

HKHLYHEIRPNSSSNKRSNNNIDQCQFFQGGGEYCSNKGGGFQLISGNDHPPEAKK  
 ARLENKLPSSSNINFQQPSNCNLSANYVDDQEQDSEAIAQMKEMIYRAAARFRP  
 VNLGEEEVVEKPRRKNVKVSSDPQTVAAARQRRERIGEIRVLQRLVPGGTMKMDT  
 ASMLDEAASYLKFLRSQVKALETLGHHNNKLDSEVNSPPFNHSFPMQTPHF  
 SLPKP  
 PG41771 MGTEGDMRFQHRDGDMLNCPSSVMNTNPLSDKVVGMMSSDSMFKASN  
 GAVPYFSSGWDPLVSLSQSENFSGHSGFSNAAYPVVQVISSTSHLAHYQPDS  
 GLGEMMPKLSCFGSGSFSEMVSFGLAECGRMNYSQNKEGGTGKALITGTHSE  
 EESQNSDKSSPNGKKRRASESHPPFNSNKNAEVPQQHDPGDNLEQDEKKHK  
 IEQNINANLRGKQTSKQTKENS DSGDAAKDNYIHVRAKRGQATNSHSLAERVRR  
 ERISERMRLQELVPGCNKITGKAVMLDEIINYVQSLQQQVEFLSMKLATVNPEL  
 NVDIERILSKNVNLQSCNAAVLGFPGLSPTHFPQGLPGIPTTTQPFHTIPQSIW  
 DNNELHDLLQMGFESNNNLGPIDGKTETLIKSMCEALRGIPIIKFAIELWKLFSY  
 SSFLQRQAPIYILIKKMWNSAKN

**Table S2** Gene and protein features of 169 PGbHLHs.

| bHLH No | Gene length | cDNA length | Protein length | Mw       | pI   | Exon No. |
|---------|-------------|-------------|----------------|----------|------|----------|
| PG00183 | 3069        | 1499        | 490            | 55802.87 | 5.63 | 5        |
| PG00883 | 611         | 289         | 96             | 10808.07 | 9.17 | 2        |
| PG00933 | 1472        | 1472        | 490            | 53916.34 | 5.41 | 1        |
| PG01029 | 7993        | 1143        | 285            | 31332.03 | 4.99 | 6        |
| PG01277 | 3726        | 1163        | 388            | 41482.21 | 6.49 | 4        |
| PG01478 | 4574        | 2073        | 526            | 57404.12 | 5.79 | 5        |
| PG01763 | 4616        | 1093        | 289            | 31576.69 | 5.29 | 9        |
| PG01888 | 4001        | 759         | 254            | 28200.21 | 5.16 | 6        |
| PG02200 | 3477        | 2259        | 404            | 43983.83 | 6.19 | 6        |
| PG02335 | 1274        | 1274        | 424            | 46838.49 | 7.81 | 1        |
| PG02475 | 4487        | 756         | 253            | 28214.27 | 6.15 | 6        |
| PG02883 | 2974        | 2291        | 517            | 56364.97 | 7.11 | 9        |

|         |      |      |     |          |      |    |
|---------|------|------|-----|----------|------|----|
| PG02930 | 3450 | 1635 | 260 | 28570.65 | 8.46 | 2  |
| PG03153 | 4190 | 900  | 301 | 32655.55 | 5.92 | 6  |
| PG03239 | 4159 | 852  | 285 | 30990.61 | 5.70 | 6  |
| PG03489 | 4764 | 835  | 279 | 31581.47 | 7.20 | 5  |
| PG04363 | 3019 | 1164 | 388 | 43208.12 | 5.61 | 3  |
| PG04535 | 1241 | 974  | 325 | 36354.88 | 5.11 | 4  |
| PG04685 | 5466 | 2014 | 462 | 48348.80 | 6.38 | 8  |
| PG04790 | 3617 | 1249 | 266 | 29676.94 | 5.16 | 5  |
| PG05026 | 1313 | 1313 | 437 | 48425.70 | 5.49 | 1  |
| PG05306 | 2384 | 1423 | 337 | 37803.11 | 6.34 | 6  |
| PG05437 | 1768 | 1124 | 375 | 41951.70 | 5.54 | 4  |
| PG05942 | 2326 | 1228 | 425 | 47002.23 | 8.34 | 5  |
| PG06292 | 2078 | 1026 | 342 | 38711.22 | 5.95 | 3  |
| PG06381 | 8074 | 1849 | 388 | 43098.08 | 6.88 | 12 |
| PG06438 | 2077 | 1522 | 507 | 55445.27 | 5.48 | 2  |
| PG06642 | 3656 | 1383 | 443 | 48608.18 | 5.56 | 10 |
| PG06701 | 6585 | 2538 | 724 | 81905.76 | 5.13 | 8  |
| PG06793 | 5109 | 2705 | 751 | 81580.00 | 6.35 | 10 |
| PG07133 | 4663 | 2280 | 652 | 73922.18 | 5.31 | 8  |
| PG07157 | 4592 | 1389 | 464 | 50170.78 | 6.49 | 6  |
| PG07173 | 1632 | 1011 | 337 | 38000.11 | 8.51 | 3  |
| PG07174 | 1582 | 1035 | 345 | 39603.26 | 6.61 | 3  |
| PG07175 | 2240 | 1479 | 374 | 42018.39 | 5.88 | 5  |
| PG07247 | 1855 | 1285 | 410 | 47276.98 | 5.70 | 3  |
| PG07364 | 1316 | 1316 | 438 | 48334.37 | 5.35 | 1  |
| PG07462 | 2397 | 893  | 298 | 33526.50 | 8.55 | 4  |
| PG07481 | 1811 | 1811 | 603 | 66674.64 | 5.75 | 1  |
| PG07666 | 3698 | 1323 | 430 | 48633.53 | 5.53 | 3  |
| PG07762 | 2469 | 1209 | 404 | 43980.71 | 5.73 | 6  |

|         |       |      |     |          |      |    |
|---------|-------|------|-----|----------|------|----|
| PG08342 | 1802  | 1802 | 600 | 66595.79 | 6.43 | 1  |
| PG08366 | 2778  | 1583 | 565 | 63938.11 | 5.14 | 7  |
| PG08551 | 7542  | 1285 | 432 | 49007.90 | 5.89 | 14 |
| PG08659 | 3014  | 2213 | 512 | 56362.82 | 6.63 | 9  |
| PG09058 | 5573  | 1796 | 599 | 65397.08 | 5.89 | 4  |
| PG09196 | 7068  | 1346 | 397 | 44259.22 | 5.28 | 6  |
| PG09666 | 1490  | 1490 | 496 | 55255.41 | 6.69 | 1  |
| PG10212 | 11768 | 2186 | 328 | 36533.80 | 6.34 | 12 |
| PG10233 | 2006  | 937  | 312 | 35471.53 | 8.34 | 2  |
| PG10428 | 4788  | 1005 | 347 | 38602.34 | 5.72 | 6  |
| PG11005 | 2751  | 869  | 254 | 28136.99 | 6.67 | 6  |
| PG11234 | 7687  | 870  | 291 | 30916.85 | 5.73 | 6  |
| PG11323 | 1346  | 682  | 227 | 25464.58 | 7.69 | 2  |
| PG11934 | 2366  | 1364 | 324 | 36898.94 | 6.04 | 3  |
| PG11966 | 1004  | 680  | 227 | 25518.63 | 8.39 | 4  |
| PG11971 | 5006  | 2206 | 506 | 55359.93 | 5.99 | 9  |
| PG12035 | 1233  | 737  | 246 | 28012.97 | 6.36 | 4  |
| PG12278 | 1493  | 1493 | 497 | 55224.39 | 6.52 | 1  |
| PG12599 | 4797  | 2857 | 600 | 65072.57 | 5.61 | 9  |
| PG12618 | 3304  | 1877 | 525 | 59320.20 | 6.91 | 9  |
| PG13088 | 1502  | 1502 | 500 | 55885.02 | 6.50 | 1  |
| PG13708 | 1497  | 1085 | 362 | 40063.18 | 5.32 | 4  |
| PG14023 | 5356  | 2259 | 506 | 55299.80 | 5.85 | 9  |
| PG14197 | 1532  | 717  | 239 | 27119.37 | 6.01 | 3  |
| PG14512 | 665   | 289  | 96  | 10846.05 | 6.56 | 2  |
| PG14815 | 1292  | 1292 | 430 | 47429.70 | 5.64 | 1  |
| PG15082 | 3076  | 1205 | 403 | 44242.12 | 7.06 | 7  |
| PG15345 | 950   | 283  | 94  | 10570.84 | 9.09 | 2  |
| PG15509 | 4719  | 2259 | 495 | 54370.99 | 5.36 | 4  |



|         |      |      |     |          |      |   |
|---------|------|------|-----|----------|------|---|
| PG16018 | 2006 | 937  | 312 | 35455.53 | 8.54 | 2 |
| PG16210 | 1444 | 826  | 276 | 31506.16 | 5.46 | 5 |
| PG16376 | 3613 | 1526 | 509 | 55685.26 | 5.14 | 4 |
| PG16383 | 812  | 812  | 270 | 29967.94 | 7.89 | 1 |
| PG16916 | 1514 | 1081 | 360 | 38636.59 | 6.03 | 2 |
| PG17327 | 1316 | 1316 | 438 | 48426.40 | 8.45 | 1 |
| PG17916 | 1880 | 904  | 301 | 32933.34 | 6.19 | 2 |
| PG18500 | 1315 | 956  | 319 | 35837.33 | 5.62 | 4 |
| PG18520 | 1566 | 915  | 309 | 34811.68 | 9.15 | 3 |
| PG18523 | 1955 | 1955 | 651 | 71652.88 | 5.91 | 1 |
| PG18773 | 3362 | 1173 | 266 | 29720.08 | 5.02 | 5 |
| PG18879 | 563  | 563  | 187 | 21595.00 | 6.75 | 1 |
| PG18931 | 1260 | 1053 | 351 | 39608.70 | 5.16 | 3 |
| PG19462 | 3117 | 1882 | 627 | 69680.32 | 6.29 | 2 |
| PG19765 | 1803 | 1068 | 356 | 39180.47 | 5.15 | 3 |
| PG20047 | 2722 | 864  | 254 | 28116.90 | 7.06 | 6 |
| PG20127 | 2205 | 939  | 313 | 35722.36 | 5.39 | 3 |
| PG20810 | 2718 | 1117 | 321 | 36138.86 | 5.12 | 4 |
| PG21026 | 1346 | 1346 | 448 | 49772.20 | 5.77 | 1 |
| PG21048 | 2982 | 915  | 305 | 33518.77 | 5.62 | 3 |
| PG21441 | 4267 | 1522 | 285 | 30978.08 | 5.52 | 7 |
| PG21758 | 3209 | 986  | 329 | 35546.44 | 7.57 | 4 |
| PG22215 | 2552 | 1433 | 479 | 53762.51 | 5.73 | 7 |
| PG22741 | 999  | 588  | 197 | 22055.33 | 5.28 | 6 |
| PG22897 | 3297 | 657  | 219 | 24892.65 | 9.15 | 3 |
| PG23736 | 4112 | 762  | 255 | 28456.51 | 5.54 | 6 |
| PG23826 | 3088 | 1114 | 338 | 38135.40 | 7.03 | 6 |
| PG24302 | 1900 | 1357 | 452 | 49977.66 | 5.74 | 2 |
| PG24323 | 1726 | 837  | 280 | 31275.08 | 6.61 | 6 |

|         |       |      |     |           |      |    |
|---------|-------|------|-----|-----------|------|----|
| PG25084 | 3372  | 1417 | 335 | 37440.72  | 6.61 | 6  |
| PG25232 | 2362  | 1218 | 407 | 44562.41  | 5.52 | 6  |
| PG25335 | 3515  | 1967 | 448 | 49588.56  | 6.44 | 10 |
| PG25345 | 5536  | 1556 | 521 | 58280.24  | 9.76 | 10 |
| PG25389 | 3247  | 1111 | 319 | 35969.73  | 5.47 | 4  |
| PG25512 | 3127  | 2035 | 451 | 49940.16  | 6.19 | 6  |
| PG25659 | 2012  | 2012 | 670 | 73916.62  | 5.86 | 1  |
| PG25699 | 3541  | 1526 | 509 | 55737.34  | 5.19 | 4  |
| PG26053 | 4995  | 1780 | 594 | 66820.21  | 7.03 | 5  |
| PG26263 | 6951  | 2778 | 929 | 104842.95 | 8.93 | 12 |
| PG26507 | 1695  | 1109 | 370 | 41129.97  | 7.67 | 4  |
| PG26994 | 652   | 463  | 154 | 17343.50  | 6.31 | 2  |
| PG27139 | 674   | 674  | 224 | 25265.22  | 9.18 | 1  |
| PG27219 | 6240  | 1394 | 332 | 36365.79  | 5.06 | 8  |
| PG27746 | 1297  | 774  | 258 | 29429.86  | 8.89 | 3  |
| PG27847 | 612   | 289  | 96  | 10838.09  | 9.17 | 2  |
| PG27901 | 1167  | 721  | 240 | 26701.07  | 8.44 | 2  |
| PG28173 | 3570  | 1526 | 435 | 48585.57  | 5.70 | 3  |
| PG28660 | 1812  | 904  | 301 | 32983.26  | 5.85 | 2  |
| PG29408 | 2979  | 1469 | 491 | 54841.11  | 4.81 | 7  |
| PG29620 | 1430  | 1056 | 352 | 39351.18  | 6.36 | 3  |
| PG29658 | 3497  | 922  | 308 | 34279.80  | 5.67 | 5  |
| PG29796 | 20274 | 2227 | 747 | 82897.45  | 8.97 | 17 |
| PG30366 | 4132  | 2034 | 495 | 54541.12  | 5.15 | 4  |
| PG30998 | 1177  | 283  | 94  | 10560.80  | 9.09 | 2  |
| PG30999 | 1183  | 283  | 94  | 10560.80  | 9.09 | 2  |
| PG32606 | 777   | 289  | 96  | 10846.05  | 6.56 | 2  |
| PG32671 | 1502  | 852  | 284 | 31920.18  | 8.63 | 3  |
| PG32830 | 4467  | 2062 | 551 | 60685.13  | 6.50 | 5  |

|         |      |      |     |          |       |    |
|---------|------|------|-----|----------|-------|----|
| PG32841 | 1039 | 790  | 263 | 29309.51 | 8.90  | 2  |
| PG32851 | 4795 | 2829 | 600 | 64988.51 | 5.69  | 11 |
| PG32981 | 1290 | 998  | 333 | 38108.36 | 4.82  | 4  |
| PG33143 | 3474 | 1231 | 242 | 26295.97 | 6.45  | 3  |
| PG33184 | 1746 | 1180 | 398 | 43645.18 | 5.33  | 2  |
| PG33513 | 1796 | 1796 | 598 | 66307.42 | 6.06  | 1  |
| PG33622 | 5467 | 1525 | 467 | 52808.29 | 9.58  | 10 |
| PG33853 | 1322 | 1322 | 440 | 48735.80 | 7.71  | 1  |
| PG34217 | 1369 | 850  | 283 | 32166.62 | 5.34  | 2  |
| PG34234 | 6288 | 1383 | 332 | 36327.73 | 5.06  | 8  |
| PG35448 | 2902 | 1822 | 465 | 50902.75 | 6.82  | 8  |
| PG35697 | 4534 | 756  | 253 | 28024.07 | 5.90  | 6  |
| PG36060 | 4409 | 1197 | 400 | 45241.04 | 6.41  | 6  |
| PG36640 | 7402 | 697  | 233 | 24791.28 | 8.95  | 5  |
| PG37017 | 2118 | 925  | 308 | 34032.15 | 5.26  | 2  |
| PG37191 | 895  | 702  | 234 | 26237.53 | 9.11  | 3  |
| PG37222 | 3243 | 2280 | 531 | 58262.62 | 6.02  | 8  |
| PG37235 | 1328 | 1328 | 442 | 49024.07 | 5.23  | 1  |
| PG37305 | 2808 | 1221 | 268 | 29454.89 | 9.37  | 8  |
| PG37445 | 4452 | 1979 | 560 | 61870.21 | 8.55  | 9  |
| PG37838 | 7354 | 1284 | 329 | 36445.25 | 5.14  | 7  |
| PG37858 | 3775 | 1132 | 411 | 44757.30 | 6.09  | 5  |
| PG37971 | 2021 | 2021 | 673 | 74435.28 | 5.95  | 1  |
| PG38201 | 2876 | 1424 | 475 | 53925.21 | 5.19  | 4  |
| PG38302 | 7141 | 1850 | 598 | 66133.43 | 6.32  | 14 |
| PG38503 | 1301 | 1301 | 433 | 47791.97 | 5.56  | 1  |
| PG38504 | 1301 | 1301 | 433 | 47791.97 | 5.56  | 1  |
| PG38698 | 512  | 379  | 126 | 14162.51 | 10.16 | 2  |
| PG39433 | 4662 | 1405 | 337 | 37460.57 | 7.67  | 6  |

|         |      |      |     |          |      |   |
|---------|------|------|-----|----------|------|---|
| PG39516 | 1447 | 682  | 227 | 25446.89 | 8.44 | 2 |
| PG39699 | 2868 | 2281 | 514 | 56054.37 | 6.88 | 7 |
| PG39922 | 3897 | 1498 | 501 | 54326.05 | 8.60 | 8 |
| PG40693 | 1454 | 1454 | 484 | 53464.81 | 5.24 | 1 |
| PG40733 | 2544 | 1010 | 337 | 38736.24 | 6.89 | 4 |
| PG40819 | 2394 | 921  | 307 | 35035.73 | 5.66 | 3 |
| PG40879 | 1484 | 1484 | 494 | 53870.32 | 5.32 | 1 |
| PG40902 | 812  | 812  | 270 | 29945.83 | 7.90 | 1 |
| PG40922 | 8207 | 916  | 307 | 32985.48 | 7.15 | 8 |
| PG41655 | 1607 | 963  | 321 | 36685.69 | 5.96 | 3 |
| PG41742 | 1322 | 1322 | 440 | 48885.49 | 5.57 | 1 |
| PG41771 | 3591 | 2007 | 459 | 50744.02 | 6.25 | 9 |

**Table S3** Pfam results of 169 PGBHLHs.

|         | Alignment<br>start | Alignment<br>end | hmm acc    | hmm name   | Type   | Bit score | E-value  |
|---------|--------------------|------------------|------------|------------|--------|-----------|----------|
| PG00183 | 259                | 309              | PF00010.24 | HLH        | Domain | 48.4      | 6.20E-13 |
| PG00883 | 22                 | 64               | PF00010.24 | HLH        | Domain | 30.2      | 3.00E-07 |
| PG00933 | 312                | 357              | PF00010.24 | HLH        | Domain | 39.9      | 2.70E-10 |
| PG00933 | 27                 | 208              | PF14215.4  | bHLH-MYC_N | Family | 138.4     | 2.50E-40 |
| PG01029 | 14                 | 48               | PF00010.24 | HLH        | Domain | 22        | 0.0001   |
| PG01277 | 206                | 248              | PF00010.24 | HLH        | Domain | 39.9      | 2.70E-10 |
| PG01478 | 341                | 384              | PF00010.24 | HLH        | Domain | 36.8      | 2.50E-09 |
| PG01763 | 134                | 178              | PF00010.24 | HLH        | Domain | 30        | 3.40E-07 |
| PG01888 | 137                | 184              | PF00010.24 | HLH        | Domain | 30.2      | 3.00E-07 |
| PG02200 | 338                | 383              | PF00010.24 | HLH        | Domain | 38        | 1.10E-09 |
| PG02335 | 241                | 286              | PF00010.24 | HLH        | Domain | 40.2      | 2.10E-10 |
| PG02475 | 136                | 183              | PF00010.24 | HLH        | Domain | 33.3      | 3.20E-08 |
| PG02883 | 364                | 411              | PF00010.24 | HLH        | Domain | 26.3      | 4.70E-06 |

---

|         |     |     |            |            |        |       |          |
|---------|-----|-----|------------|------------|--------|-------|----------|
| PG02930 | 75  | 121 | PF00010.24 | HLH        | Domain | 36.1  | 4.20E-09 |
| PG03153 | 190 | 230 | PF00010.24 | HLH        | Domain | 23.9  | 2.80E-05 |
| PG03239 | 176 | 215 | PF00010.24 | HLH        | Domain | 23.1  | 4.70E-05 |
| PG03489 | 118 | 157 | PF00010.24 | HLH        | Domain | 26.2  | 5.10E-06 |
| PG04363 | 242 | 288 | PF00010.24 | HLH        | Domain | 41.1  | 1.20E-10 |
| PG04363 | 48  | 156 | PF14215.4  | bHLH-MYC_N | Family | 89.9  | 1.90E-25 |
| PG04535 | 147 | 190 | PF00010.24 | HLH        | Domain | 33.2  | 3.50E-08 |
| PG04685 | 261 | 306 | PF00010.24 | HLH        | Domain | 37.4  | 1.70E-09 |
| PG04790 | 125 | 170 | PF00010.24 | HLH        | Domain | 49.8  | 2.20E-13 |
| PG05026 | 253 | 298 | PF00010.24 | HLH        | Domain | 40.5  | 1.80E-10 |
| PG05026 | 26  | 185 | PF14215.4  | bHLH-MYC_N | Family | 143.9 | 5.10E-42 |
| PG05306 | 49  | 98  | PF00010.24 | HLH        | Domain | 30.5  | 2.30E-07 |
| PG05437 | 216 | 260 | PF00010.24 | HLH        | Domain | 40.8  | 1.40E-10 |
| PG05942 | 362 | 407 | PF00010.24 | HLH        | Domain | 38.8  | 5.90E-10 |
| PG06292 | 140 | 191 | PF00010.24 | HLH        | Domain | 47.1  | 1.50E-12 |
| PG06381 | 237 | 281 | PF00010.24 | HLH        | Domain | 30.7  | 2.10E-07 |
| PG06438 | 315 | 360 | PF00010.24 | HLH        | Domain | 40.2  | 2.20E-10 |
| PG06438 | 38  | 213 | PF14215.4  | bHLH-MYC_N | Family | 149.7 | 8.20E-44 |
| PG06642 | 285 | 333 | PF00010.24 | HLH        | Domain | 30    | 3.30E-07 |
| PG06701 | 526 | 571 | PF00010.24 | HLH        | Domain | 34.2  | 1.60E-08 |
| PG06701 | 18  | 130 | PF14215.4  | bHLH-MYC_N | Family | 85.1  | 6.00E-24 |
| PG06701 | 128 | 278 | PF14215.4  | bHLH-MYC_N | Family | 125.3 | 2.70E-36 |
| PG06793 | 463 | 509 | PF00010.24 | HLH        | Domain | 50.7  | 1.20E-13 |
| PG07133 | 454 | 499 | PF00010.24 | HLH        | Domain | 33.4  | 2.90E-08 |
| PG07133 | 17  | 206 | PF14215.4  | bHLH-MYC_N | Family | 153   | 8.40E-45 |
| PG07157 | 277 | 323 | PF00010.24 | HLH        | Domain | 50.8  | 1.10E-13 |
| PG07173 | 156 | 203 | PF00010.24 | HLH        | Domain | 41.3  | 1.00E-10 |
| PG07174 | 147 | 218 | PF00010.24 | HLH        | Domain | 34.6  | 1.30E-08 |
| PG07175 | 198 | 244 | PF00010.24 | HLH        | Domain | 41.9  | 6.40E-11 |

---

---

|         |     |     |            |            |        |       |          |
|---------|-----|-----|------------|------------|--------|-------|----------|
| PG07247 | 204 | 255 | PF00010.24 | HLH        | Domain | 49.8  | 2.20E-13 |
| PG07364 | 253 | 298 | PF00010.24 | HLH        | Domain | 40.5  | 1.80E-10 |
| PG07364 | 26  | 185 | PF14215.4  | bHLH-MYC_N | Family | 142.3 | 1.50E-41 |
| PG07462 | 77  | 129 | PF00010.24 | HLH        | Domain | 36.5  | 3.20E-09 |
| PG07481 | 433 | 479 | PF00010.24 | HLH        | Domain | 39.7  | 3.20E-10 |
| PG07481 | 46  | 234 | PF14215.4  | bHLH-MYC_N | Family | 188.8 | 8.70E-56 |
| PG07666 | 252 | 303 | PF00010.24 | HLH        | Domain | 37.6  | 1.40E-09 |
| PG07762 | 333 | 378 | PF00010.24 | HLH        | Domain | 35.1  | 8.70E-09 |
| PG08342 | 431 | 477 | PF00010.24 | HLH        | Domain | 39.7  | 3.20E-10 |
| PG08342 | 46  | 234 | PF14215.4  | bHLH-MYC_N | Family | 189.3 | 5.80E-56 |
| PG08366 | 348 | 391 | PF00010.24 | HLH        | Domain | 39.1  | 5.00E-10 |
| PG08366 | 2   | 158 | PF14215.4  | bHLH-MYC_N | Family | 81.3  | 8.80E-23 |
| PG08551 | 109 | 135 | PF00010.24 | HLH        | Domain | 28.6  | 9.10E-07 |
| PG08659 | 321 | 368 | PF00010.24 | HLH        | Domain | 25.4  | 9.30E-06 |
| PG09058 | 154 | 205 | PF00010.24 | HLH        | Domain | 40.1  | 2.30E-10 |
| PG09196 | 161 | 204 | PF00010.24 | HLH        | Domain | 36.6  | 3.00E-09 |
| PG09666 | 320 | 366 | PF00010.24 | HLH        | Domain | 37.1  | 2.00E-09 |
| PG09666 | 24  | 218 | PF14215.4  | bHLH-MYC_N | Family | 153.3 | 6.60E-45 |
| PG10212 | 245 | 284 | PF00010.24 | HLH        | Domain | 35.7  | 5.50E-09 |
| PG10233 | 95  | 146 | PF00010.24 | HLH        | Domain | 41.6  | 8.00E-11 |
| PG10428 | 159 | 206 | PF00010.24 | HLH        | Domain | 30.9  | 1.70E-07 |
| PG11005 | 81  | 127 | PF00010.24 | HLH        | Domain | 40.7  | 1.50E-10 |
| PG11234 | 139 | 183 | PF00010.24 | HLH        | Domain | 29.9  | 3.70E-07 |
| PG11323 | 133 | 173 | PF00010.24 | HLH        | Domain | 23    | 5.20E-05 |
| PG11934 | 120 | 171 | PF00010.24 | HLH        | Domain | 37.9  | 1.10E-09 |
| PG11966 | 56  | 99  | PF00010.24 | HLH        | Domain | 36.6  | 2.80E-09 |
| PG11971 | 307 | 352 | PF00010.24 | HLH        | Domain | 49.3  | 3.30E-13 |
| PG12035 | 60  | 102 | PF00010.24 | HLH        | Domain | 32.3  | 6.30E-08 |
| PG12278 | 320 | 366 | PF00010.24 | HLH        | Domain | 37.1  | 2.00E-09 |

---

---

|         |     |     |            |            |        |       |          |
|---------|-----|-----|------------|------------|--------|-------|----------|
| PG12278 | 24  | 218 | PF14215.4  | bHLH-MYC_N | Family | 153.4 | 6.00E-45 |
| PG12599 | 415 | 463 | PF00010.24 | HLH        | Domain | 26.2  | 5.30E-06 |
| PG12618 | 383 | 428 | PF00010.24 | HLH        | Domain | 30.4  | 2.50E-07 |
| PG13088 | 319 | 365 | PF00010.24 | HLH        | Domain | 38.4  | 8.00E-10 |
| PG13088 | 24  | 216 | PF14215.4  | bHLH-MYC_N | Family | 154.8 | 2.40E-45 |
| PG13708 | 172 | 219 | PF00010.24 | HLH        | Domain | 30.9  | 1.80E-07 |
| PG14023 | 306 | 352 | PF00010.24 | HLH        | Domain | 50.7  | 1.10E-13 |
| PG14197 | 198 | 227 | PF00010.24 | HLH        | Domain | 24.8  | 1.40E-05 |
| PG14512 | 21  | 63  | PF00010.24 | HLH        | Domain | 23.1  | 4.70E-05 |
| PG14815 | 248 | 294 | PF00010.24 | HLH        | Domain | 39.4  | 3.90E-10 |
| PG14815 | 22  | 181 | PF14215.4  | bHLH-MYC_N | Family | 137.2 | 5.90E-40 |
| PG15082 | 339 | 384 | PF00010.24 | HLH        | Domain | 38.9  | 5.50E-10 |
| PG15345 | 20  | 61  | PF00010.24 | HLH        | Domain | 22.6  | 6.80E-05 |
| PG15509 | 310 | 353 | PF00010.24 | HLH        | Domain | 36.7  | 2.70E-09 |
| PG16018 | 95  | 146 | PF00010.24 | HLH        | Domain | 41.6  | 8.00E-11 |
| PG16210 | 202 | 242 | PF00010.24 | HLH        | Domain | 32.8  | 4.40E-08 |
| PG16376 | 324 | 367 | PF00010.24 | HLH        | Domain | 36.7  | 2.80E-09 |
| PG16383 | 174 | 213 | PF00010.24 | HLH        | Domain | 25.6  | 8.20E-06 |
| PG16916 | 131 | 182 | PF00010.24 | HLH        | Domain | 39.5  | 3.50E-10 |
| PG17327 | 343 | 383 | PF00010.24 | HLH        | Domain | 23.4  | 4.00E-05 |
| PG17916 | 117 | 163 | PF00010.24 | HLH        | Domain | 45.1  | 6.30E-12 |
| PG18500 | 148 | 191 | PF00010.24 | HLH        | Domain | 37.4  | 1.70E-09 |
| PG18520 | 102 | 153 | PF00010.24 | HLH        | Domain | 40.7  | 1.50E-10 |
| PG18523 | 471 | 516 | PF00010.24 | HLH        | Domain | 39.5  | 3.70E-10 |
| PG18523 | 55  | 237 | PF14215.4  | bHLH-MYC_N | Family | 193.2 | 3.80E-57 |
| PG18773 | 125 | 170 | PF00010.24 | HLH        | Domain | 49.8  | 2.20E-13 |
| PG18879 | 140 | 165 | PF00010.24 | HLH        | Domain | 26.4  | 4.50E-06 |
| PG18931 | 146 | 189 | PF00010.24 | HLH        | Domain | 32.8  | 4.70E-08 |
| PG19462 | 431 | 477 | PF00010.24 | HLH        | Domain | 39.6  | 3.30E-10 |

---

---

|         |     |     |            |            |        |       |          |
|---------|-----|-----|------------|------------|--------|-------|----------|
| PG19462 | 46  | 234 | PF14215.4  | bHLH-MYC_N | Family | 188.6 | 9.60E-56 |
| PG19765 | 295 | 338 | PF00010.24 | HLH        | Domain | 37.6  | 1.50E-09 |
| PG20047 | 82  | 127 | PF00010.24 | HLH        | Domain | 39.5  | 3.80E-10 |
| PG20127 | 120 | 171 | PF00010.24 | HLH        | Domain | 42.8  | 3.40E-11 |
| PG20810 | 122 | 173 | PF00010.24 | HLH        | Domain | 47    | 1.60E-12 |
| PG21026 | 268 | 313 | PF00010.24 | HLH        | Domain | 41.3  | 1.00E-10 |
| PG21026 | 32  | 188 | PF14215.4  | bHLH-MYC_N | Family | 138.6 | 2.20E-40 |
| PG21048 | 89  | 135 | PF00010.24 | HLH        | Domain | 38.3  | 8.90E-10 |
| PG21441 | 134 | 178 | PF00010.24 | HLH        | Domain | 30    | 3.30E-07 |
| PG21758 | 111 | 164 | PF00010.24 | HLH        | Domain | 27.7  | 1.70E-06 |
| PG22215 | 287 | 331 | PF00010.24 | HLH        | Domain | 38.9  | 5.60E-10 |
| PG22741 | 30  | 79  | PF00010.24 | HLH        | Domain | 26    | 5.90E-06 |
| PG22897 | 142 | 181 | PF00010.24 | HLH        | Domain | 26.2  | 5.10E-06 |
| PG23736 | 138 | 185 | PF00010.24 | HLH        | Domain | 33.2  | 3.30E-08 |
| PG23826 | 156 | 203 | PF00010.24 | HLH        | Domain | 41.1  | 1.20E-10 |
| PG24302 | 271 | 316 | PF00010.24 | HLH        | Domain | 40.4  | 1.90E-10 |
| PG24302 | 44  | 203 | PF14215.4  | bHLH-MYC_N | Family | 135.8 | 1.60E-39 |
| PG24323 | 159 | 206 | PF00010.24 | HLH        | Domain | 26.3  | 4.80E-06 |
| PG25084 | 47  | 96  | PF00010.24 | HLH        | Domain | 30.5  | 2.30E-07 |
| PG25232 | 336 | 381 | PF00010.24 | HLH        | Domain | 35.1  | 8.80E-09 |
| PG25335 | 257 | 305 | PF00010.24 | HLH        | Domain | 30    | 3.30E-07 |
| PG25345 | 243 | 289 | PF00010.24 | HLH        | Domain | 47.8  | 9.20E-13 |
| PG25389 | 122 | 173 | PF00010.24 | HLH        | Domain | 47.7  | 9.90E-13 |
| PG25512 | 380 | 425 | PF00010.24 | HLH        | Domain | 30.7  | 2.00E-07 |
| PG25659 | 490 | 535 | PF00010.24 | HLH        | Domain | 33    | 4.00E-08 |
| PG25659 | 69  | 255 | PF14215.4  | bHLH-MYC_N | Family | 190   | 3.50E-56 |
| PG25699 | 324 | 367 | PF00010.24 | HLH        | Domain | 36.7  | 2.80E-09 |
| PG26053 | 202 | 248 | PF00010.24 | HLH        | Domain | 41.6  | 8.30E-11 |
| PG26053 | 380 | 426 | PF00010.24 | HLH        | Domain | 41.6  | 8.30E-11 |

---



---

|         |     |     |            |            |        |      |          |
|---------|-----|-----|------------|------------|--------|------|----------|
| PG26263 | 219 | 266 | PF00010.24 | HLH        | Domain | 39.4 | 3.90E-10 |
| PG26263 | 446 | 493 | PF00010.24 | HLH        | Domain | 39.4 | 3.90E-10 |
| PG26263 | 744 | 791 | PF00010.24 | HLH        | Domain | 39.4 | 3.90E-10 |
| PG26507 | 167 | 212 | PF00010.24 | HLH        | Domain | 48.3 | 6.30E-13 |
| PG26994 | 41  | 83  | PF00010.24 | HLH        | Domain | 33.5 | 2.70E-08 |
| PG27139 | 131 | 170 | PF00010.24 | HLH        | Domain | 26.2 | 5.30E-06 |
| PG27219 | 44  | 92  | PF00010.24 | HLH        | Domain | 40.7 | 1.60E-10 |
| PG27746 | 78  | 130 | PF00010.24 | HLH        | Domain | 36.8 | 2.50E-09 |
| PG27847 | 22  | 64  | PF00010.24 | HLH        | Domain | 29.8 | 3.80E-07 |
| PG27901 | 74  | 124 | PF00010.24 | HLH        | Domain | 43.1 | 2.70E-11 |
| PG28173 | 285 | 331 | PF00010.24 | HLH        | Domain | 40.8 | 1.40E-10 |
| PG28173 | 48  | 202 | PF14215.4  | bHLH-MYC_N | Family | 128  | 3.90E-37 |
| PG28660 | 117 | 163 | PF00010.24 | HLH        | Domain | 45.1 | 6.30E-12 |
| PG29408 | 291 | 334 | PF00010.24 | HLH        | Domain | 39.3 | 4.10E-10 |
| PG29408 | 3   | 44  | PF14215.4  | bHLH-MYC_N | Family | 30.9 | 2.60E-07 |
| PG29620 | 181 | 227 | PF00010.24 | HLH        | Domain | 42.6 | 4.10E-11 |
| PG29658 | 57  | 110 | PF00010.24 | HLH        | Domain | 37.1 | 2.10E-09 |
| PG29796 | 574 | 622 | PF00010.24 | HLH        | Domain | 25.8 | 7.00E-06 |
| PG30366 | 309 | 352 | PF00010.24 | HLH        | Domain | 34.8 | 1.10E-08 |
| PG30998 | 20  | 61  | PF00010.24 | HLH        | Domain | 25.5 | 8.80E-06 |
| PG30999 | 20  | 61  | PF00010.24 | HLH        | Domain | 25.5 | 8.80E-06 |
| PG32606 | 21  | 63  | PF00010.24 | HLH        | Domain | 23.1 | 4.70E-05 |
| PG32671 | 102 | 153 | PF00010.24 | HLH        | Domain | 41.8 | 6.90E-11 |
| PG32830 | 366 | 409 | PF00010.24 | HLH        | Domain | 36.7 | 2.60E-09 |
| PG32841 | 164 | 203 | PF00010.24 | HLH        | Domain | 25.6 | 7.90E-06 |
| PG32851 | 415 | 463 | PF00010.24 | HLH        | Domain | 26.2 | 5.30E-06 |
| PG32981 | 162 | 205 | PF00010.24 | HLH        | Domain | 35.8 | 5.20E-09 |
| PG33143 | 75  | 121 | PF00010.24 | HLH        | Domain | 39.6 | 3.40E-10 |
| PG33184 | 154 | 205 | PF00010.24 | HLH        | Domain | 41.2 | 1.10E-10 |

---

---

|         |     |     |            |            |        |       |          |
|---------|-----|-----|------------|------------|--------|-------|----------|
| PG33513 | 434 | 480 | PF00010.24 | HLH        | Domain | 39.7  | 3.10E-10 |
| PG33513 | 46  | 234 | PF14215.4  | bHLH-MYC_N | Family | 190.5 | 2.40E-56 |
| PG33622 | 215 | 254 | PF00010.24 | HLH        | Domain | 31.7  | 1.00E-07 |
| PG33853 | 345 | 385 | PF00010.24 | HLH        | Domain | 23.3  | 4.00E-05 |
| PG34217 | 164 | 208 | PF00010.24 | HLH        | Domain | 25.1  | 1.10E-05 |
| PG34234 | 44  | 92  | PF00010.24 | HLH        | Domain | 40.7  | 1.60E-10 |
| PG35448 | 275 | 322 | PF00010.24 | HLH        | Domain | 25.9  | 6.20E-06 |
| PG35697 | 136 | 183 | PF00010.24 | HLH        | Domain | 33.3  | 3.20E-08 |
| PG36060 | 181 | 228 | PF00010.24 | HLH        | Domain | 30.7  | 2.10E-07 |
| PG36640 | 139 | 183 | PF00010.24 | HLH        | Domain | 30.3  | 2.60E-07 |
| PG37017 | 121 | 167 | PF00010.24 | HLH        | Domain | 44.8  | 8.20E-12 |
| PG37191 | 198 | 224 | PF00010.24 | HLH        | Domain | 22.9  | 5.80E-05 |
| PG37222 | 342 | 389 | PF00010.24 | HLH        | Domain | 26.6  | 3.80E-06 |
| PG37235 | 254 | 299 | PF00010.24 | HLH        | Domain | 43.1  | 2.70E-11 |
| PG37235 | 25  | 185 | PF14215.4  | bHLH-MYC_N | Family | 136.3 | 1.10E-39 |
| PG37305 | 189 | 234 | PF00010.24 | HLH        | Domain | 26.1  | 5.50E-06 |
| PG37445 | 340 | 387 | PF00010.24 | HLH        | Domain | 25.6  | 8.00E-06 |
| PG37838 | 43  | 92  | PF00010.24 | HLH        | Domain | 52.8  | 2.50E-14 |
| PG37858 | 329 | 375 | PF00010.24 | HLH        | Domain | 51.1  | 8.50E-14 |
| PG37971 | 493 | 538 | PF00010.24 | HLH        | Domain | 33    | 4.00E-08 |
| PG37971 | 68  | 254 | PF14215.4  | bHLH-MYC_N | Family | 189.2 | 6.40E-56 |
| PG38201 | 252 | 299 | PF00010.24 | HLH        | Domain | 44.9  | 7.40E-12 |
| PG38302 | 317 | 365 | PF00010.24 | HLH        | Domain | 29.5  | 4.90E-07 |
| PG38302 | 460 | 508 | PF00010.24 | HLH        | Domain | 29.5  | 4.90E-07 |
| PG38503 | 252 | 297 | PF00010.24 | HLH        | Domain | 41.4  | 9.50E-11 |
| PG38503 | 25  | 184 | PF14215.4  | bHLH-MYC_N | Family | 136.8 | 7.80E-40 |
| PG38504 | 252 | 297 | PF00010.24 | HLH        | Domain | 41.4  | 9.50E-11 |
| PG38504 | 25  | 184 | PF14215.4  | bHLH-MYC_N | Family | 136.8 | 7.80E-40 |
| PG38698 | 4   | 57  | PF00010.24 | HLH        | Domain | 48.1  | 7.50E-13 |

---

|         |     |     |            |            |        |       |          |
|---------|-----|-----|------------|------------|--------|-------|----------|
| PG39433 | 49  | 98  | PF00010.24 | HLH        | Domain | 31.6  | 1.00E-07 |
| PG39516 | 61  | 111 | PF00010.24 | HLH        | Domain | 43.3  | 2.40E-11 |
| PG39699 | 364 | 411 | PF00010.24 | HLH        | Domain | 26.3  | 4.70E-06 |
| PG39922 | 308 | 355 | PF00010.24 | HLH        | Domain | 25.1  | 1.10E-05 |
| PG40693 | 309 | 354 | PF00010.24 | HLH        | Domain | 39.9  | 2.70E-10 |
| PG40693 | 27  | 208 | PF14215.4  | bHLH-MYC_N | Family | 139.2 | 1.40E-40 |
| PG40733 | 131 | 176 | PF00010.24 | HLH        | Domain | 40.1  | 2.40E-10 |
| PG40819 | 120 | 171 | PF00010.24 | HLH        | Domain | 43    | 3.00E-11 |
| PG40879 | 311 | 356 | PF00010.24 | HLH        | Domain | 40.3  | 2.10E-10 |
| PG40879 | 34  | 209 | PF14215.4  | bHLH-MYC_N | Family | 149.8 | 7.80E-44 |
| PG40902 | 174 | 213 | PF00010.24 | HLH        | Domain | 25.6  | 8.20E-06 |
| PG40922 | 158 | 202 | PF00010.24 | HLH        | Domain | 30.5  | 2.30E-07 |
| PG41655 | 147 | 194 | PF00010.24 | HLH        | Domain | 49.1  | 3.80E-13 |
| PG41742 | 355 | 395 | PF00010.24 | HLH        | Domain | 21.6  | 0.00014  |
| PG41771 | 257 | 305 | PF00010.24 | HLH        | Domain | 30    | 3.40E-07 |

**Table S4** Amino acid sequences and features of 20 conserved motifs in *P. ginseng* bHLH proteins.

| Motif No. | Sequence                                  | E-value   | Sites | Width |
|-----------|-------------------------------------------|-----------|-------|-------|
| 1         | ERRRREKJNERLYAL                           | 3.5e-1092 | 150   | 15    |
| 2         | KKMDKASMLDEAINYIKELQQVQFLEMK              | 1.7e-1788 | 145   | 29    |
| 3         | IRIQCPKRPGLLLKLMKALEELELDILHA             | 2.4e-543  | 73    | 29    |
| 4         | PKDYIHVRARRGQATDSHSJA                     | 1.4e-478  | 37    | 21    |
| 5         | HGIQTFVCIPTCSGVLELGSTITISENWSLVQQAKSLFGSD | 9.4e-435  | 24    | 41    |
| 6         | PVVEKKRAPRKRGRKPANGREEPLNHVEA             | 3E-257    | 18    | 29    |
| 7         | DAAVDGDVTDAEWFYLVSMTRSFAGDGS              | 7E-265    | 24    | 29    |
| 8         | ESWSYAIFWQTSKDS                           | 6E-182    | 26    | 15    |
| 9         | KAFSSGAHVWLSGTDQLQSAECERAKEAQ             | 2E-238    | 20    | 29    |
| 10        | LVLSWGDGHRGTTKHET                         | 6E-157    | 24    | 18    |

|    |                                                    |         |     |    |
|----|----------------------------------------------------|---------|-----|----|
| 11 | RSLVPN                                             | 1E-151  | 149 | 6  |
| 12 | ATPPGSSITPTSSFHPLTPTPPTLPHRVKEELCPSALPSPKNPSARVEVR | 1E-148  | 9   | 50 |
| 13 | AVADVEVKMVGSDAM                                    | 3E-145  | 32  | 15 |
| 14 | VQGGKKKRRRPKSKKNKEEIQRMTHIA                        | 1E-129  | 11  | 29 |
| 15 | LATVNPRLDFNIEGLLSKDI                               | 1E-115  | 18  | 20 |
| 16 | PTLQQRLQYIVESQP                                    | 1E-94   | 17  | 15 |
| 17 | VISCFNGFALDIFRAEQCREG                              | 1.1E-89 | 10  | 21 |
| 18 | MKEMIFRIAAMQPVNJGPESVKPPKRRNV                      | 2.4E-97 | 9   | 29 |
| 19 | YFSSGWDPLVSLSQSENFGAHNGFSNPAYPVVTENQVISTTSHLAHYQPD | 7.4E-89 | 6   | 50 |
| 20 | SVVNEJMLQDVVIKV                                    | 1.4E-83 | 18  | 15 |

**Table S5** FPKM values of all genes among 21 RNA-Seq databases (see excel).

**Table S6** Pearson's correlation coefficient between the PGbHLH expression of MeJA-up-regulated PGbHLHs and ginsenoside contents in different tissues of *P. ginseng* main roots.

|         | Rg1     |         | Re      |         | Rf      |         | Rb1     |         | Rc      |         | Rb2     |         | Rd     |
|---------|---------|---------|---------|---------|---------|---------|---------|---------|---------|---------|---------|---------|--------|
|         | cor     | p-value | cor    |
| PG40693 | 0.8789  | 0.00181 | 0.9731  | 0.00001 | 0.9209  | 0.00042 | 0.9465  | 0.00011 | 0.9825  | 0.00000 | 0.9749  | 0.00001 | 0.967  |
| PG00933 | -0.2360 | 0.54107 | -0.1832 | 0.63712 | -0.2341 | 0.54444 | -0.2240 | 0.56228 | -0.1849 | 0.63385 | -0.1940 | 0.61692 | -0.201 |
| PG05026 | -0.2323 | 0.54762 | -0.1452 | 0.70938 | -0.1963 | 0.61265 | -0.1999 | 0.60612 | -0.1311 | 0.73677 | -0.1499 | 0.70031 | -0.133 |
| PG07364 | -0.4042 | 0.28058 | -0.3951 | 0.29263 | -0.4807 | 0.19026 | -0.4427 | 0.23278 | -0.4034 | 0.28160 | -0.4221 | 0.25776 | -0.448 |
| PG26994 | 0.8646  | 0.00263 | 0.9112  | 0.00063 | 0.9787  | 0.00000 | 0.9232  | 0.00038 | 0.8997  | 0.00095 | 0.9280  | 0.00031 | 0.923  |
| PG19462 | 0.8203  | 0.00676 | 0.8947  | 0.00112 | 0.8492  | 0.00377 | 0.8797  | 0.00176 | 0.8850  | 0.00151 | 0.8901  | 0.00130 | 0.850  |
| PG38698 | -0.0641 | 0.86987 | -0.3208 | 0.39992 | -0.2208 | 0.56806 | -0.2197 | 0.57004 | -0.3009 | 0.43147 | -0.3088 | 0.41884 | -0.249 |
| PG29620 | 0.8629  | 0.00274 | 0.8789  | 0.00180 | 0.7424  | 0.02197 | 0.8562  | 0.00322 | 0.8620  | 0.00280 | 0.8477  | 0.00390 | 0.774  |
| PG06701 | 0.7917  | 0.01100 | 0.8762  | 0.00195 | 0.8961  | 0.00107 | 0.8556  | 0.00326 | 0.8494  | 0.00376 | 0.8773  | 0.00188 | 0.840  |
| PG21048 | -0.4947 | 0.17578 | -0.4681 | 0.20379 | -0.4903 | 0.18029 | -0.5125 | 0.15833 | -0.4758 | 0.19544 | -0.4821 | 0.18872 | -0.484 |
| PG07133 | -0.4365 | 0.24017 | -0.2298 | 0.55202 | -0.2220 | 0.56585 | -0.3042 | 0.42620 | -0.2187 | 0.57179 | -0.2125 | 0.58305 | -0.186 |

|         |         |         |         |         |         |         |         |         |         |         |         |         |        |
|---------|---------|---------|---------|---------|---------|---------|---------|---------|---------|---------|---------|---------|--------|
| PG08342 | -0.6483 | 0.05896 | -0.4856 | 0.18509 | -0.5330 | 0.13948 | -0.5619 | 0.11539 | -0.4771 | 0.19405 | -0.4856 | 0.18511 | -0.479 |
| PG07173 | 0.6911  | 0.03923 | 0.8371  | 0.00488 | 0.8227  | 0.00646 | 0.8061  | 0.00870 | 0.8868  | 0.00143 | 0.8650  | 0.00260 | 0.930  |
| PG24302 | 0.5206  | 0.15074 | 0.5417  | 0.13195 | 0.6355  | 0.06587 | 0.5424  | 0.13134 | 0.4926  | 0.17791 | 0.5434  | 0.13053 | 0.498  |

**Table S7** Pearson's correlation coefficient between the expression levels of selected PGBHLHs and those of ginsenoside biosynthesis enzymes in 21 RNA-Seq databases.

| Enzymes | PG40693  |         | PG26994  |         | PG19462  |         | PG29620  |         | PG06701  |         | PG07173  |
|---------|----------|---------|----------|---------|----------|---------|----------|---------|----------|---------|----------|
|         | cor      | p-value | cor      |
| ACTT    | 0.97195  | 0       | 0.00885  | 0.96964 | 0.81585  | 0.00001 | 0.15715  | 0.49631 | 0.13416  | 0.56206 | 0.53612  |
| HMGS1   | 0.94998  | 0       | -0.0587  | 0.80048 | 0.84341  | 0       | 0.07329  | 0.75223 | 0.08253  | 0.7221  | 0.61502  |
| HMGS2   | 0.98674  | 0       | -0.11352 | 0.62416 | 0.80975  | 0.00001 | 0.12092  | 0.60158 | 0.09006  | 0.69785 | 0.50336  |
| HMGS3   | -0.23623 | 0.30258 | -0.12242 | 0.59705 | 0.02626  | 0.91006 | 0.3599   | 0.10904 | -0.47818 | 0.02833 | 0.02635  |
| HMGR1   | 0.98177  | 0       | -0.07759 | 0.73816 | 0.77024  | 0.00004 | 0.18006  | 0.43478 | 0.18458  | 0.42316 | 0.46923  |
| HMGR2   | 0.96428  | 0       | -0.1434  | 0.53518 | 0.69248  | 0.0005  | 0.13482  | 0.56012 | 0.14438  | 0.53237 | 0.38929  |
| HMGR3   | -0.10042 | 0.66495 | -0.34859 | 0.12146 | 0.03204  | 0.89033 | 0.07063  | 0.76094 | -0.68678 | 0.00058 | -0.20234 |
| HMGR4   | 0.16326  | 0.4795  | 0.11185  | 0.6293  | 0.22142  | 0.33476 | 0.22955  | 0.31684 | -0.12314 | 0.59487 | 0.38087  |
| HMGR5   | 0.27818  | 0.22209 | -0.30959 | 0.17204 | 0.00072  | 0.99754 | 0.10251  | 0.65838 | -0.27479 | 0.228   | -0.03736 |
| HMGR6   | 0.32625  | 0.14892 | -0.09463 | 0.68327 | 0.11497  | 0.61971 | 0.05749  | 0.80449 | -0.08019 | 0.72971 | 0.14219  |
| HMGR7   | -0.07738 | 0.73885 | -0.19173 | 0.40508 | -0.2709  | 0.23493 | -0.12857 | 0.57861 | -0.17027 | 0.46056 | -0.22363 |
| HMGR8   | -0.0538  | 0.81683 | -0.21223 | 0.3557  | -0.28342 | 0.21313 | -0.1401  | 0.54471 | -0.1916  | 0.40539 | -0.20238 |
| MVK1    | 0.74464  | 0.00011 | 0.2162   | 0.34656 | 0.71127  | 0.0003  | 0.29595  | 0.19272 | 0.36856  | 0.10018 | 0.69869  |
| MVK2    | 0.2362   | 0.30264 | 0.05523  | 0.81206 | 0.26224  | 0.25081 | 0.44781  | 0.04178 | 0.10686  | 0.64477 | 0.29937  |
| PMK1    | 0.65996  | 0.00113 | -0.22775 | 0.32076 | 0.4919   | 0.02351 | 0.45751  | 0.03704 | -0.10141 | 0.66184 | 0.06441  |
| PMK2    | -0.15954 | 0.48971 | 0.18814  | 0.41411 | -0.14311 | 0.536   | 0.04851  | 0.83458 | 0.11645  | 0.61519 | -0.12736 |
| PMK3    | -0.24927 | 0.27586 | -0.18984 | 0.4098  | -0.1759  | 0.44564 | 0.44626  | 0.04258 | -0.23495 | 0.30527 | -0.36513 |
| PMK4    | -0.27949 | 0.21982 | -0.29372 | 0.19624 | -0.21009 | 0.36069 | 0.18986  | 0.40976 | -0.39553 | 0.07594 | -0.41617 |
| MVD1    | 0.03262  | 0.88837 | 0.14634  | 0.52676 | 0.27586  | 0.22612 | -0.22748 | 0.32135 | -0.03751 | 0.87176 | 0.40505  |
| MVD2    | 0.26388  | 0.24774 | -0.07724 | 0.7393  | 0.14436  | 0.53243 | -0.22497 | 0.32685 | -0.07765 | 0.73795 | 0.21392  |
| IDI1    | 0.2519   | 0.27066 | 0.24695  | 0.28051 | 0.09634  | 0.67784 | -0.17373 | 0.45138 | 0.21593  | 0.34719 | 0.14077  |

|              |          |         |          |         |          |         |          |         |          |         |          |
|--------------|----------|---------|----------|---------|----------|---------|----------|---------|----------|---------|----------|
| IDI2         | -0.02055 | 0.92955 | 0.25809  | 0.25866 | -0.03663 | 0.87476 | -0.2503  | 0.27381 | 0.13498  | 0.55964 | 0.18486  |
| FPS1         | 0.8692   | 0       | 0.01391  | 0.95227 | 0.65472  | 0.00128 | 0.03034  | 0.89614 | 0.18175  | 0.43042 | 0.54114  |
| FPS2         | 0.75974  | 0.00006 | -0.05511 | 0.81247 | 0.71045  | 0.00031 | 0.00947  | 0.96752 | -0.00872 | 0.97008 | 0.67014  |
| SS1          | 0.90737  | 0       | -0.02738 | 0.90621 | 0.59652  | 0.00431 | 0.04692  | 0.83994 | 0.30423  | 0.17997 | 0.4101   |
| SS2          | 0.87853  | 0       | 0.04652  | 0.84131 | 0.55005  | 0.00978 | 0.16584  | 0.47248 | 0.35361  | 0.11583 | 0.39222  |
| SS3          | 0.89479  | 0       | -0.25293 | 0.26864 | 0.62061  | 0.00268 | 0.16397  | 0.47757 | -0.02091 | 0.92832 | 0.25051  |
| SS4          | 0.18525  | 0.42144 | -0.31523 | 0.16396 | 0.05349  | 0.81789 | 0.38723  | 0.08287 | -0.27658 | 0.22487 | -0.25905 |
| SE1          | 0.66523  | 0.001   | 0.01771  | 0.93928 | 0.62012  | 0.00271 | 0.29615  | 0.19241 | 0.10595  | 0.6476  | 0.27367  |
| SE2          | 0.3157   | 0.16329 | -0.13139 | 0.57024 | 0.37699  | 0.09207 | 0.35647  | 0.11271 | -0.10054 | 0.66456 | 0.14262  |
| SE3          | 0.94664  | 0       | -0.12218 | 0.59778 | 0.7058   | 0.00035 | 0.23238  | 0.31074 | 0.1059   | 0.64777 | 0.38891  |
| SE4          | -0.16915 | 0.46357 | -0.38165 | 0.08779 | -0.14093 | 0.5423  | -0.18869 | 0.4127  | -0.35158 | 0.11808 | -0.39188 |
| $\beta$ .AS2 | -0.0665  | 0.77456 | -0.18403 | 0.42457 | -0.18445 | 0.42348 | -0.10927 | 0.63729 | -0.13995 | 0.54513 | -0.1965  |
| $\beta$ .AS3 | -0.28337 | 0.21322 | -0.16366 | 0.4784  | -0.08849 | 0.70287 | 0.44837  | 0.0415  | -0.30006 | 0.18633 | -0.37799 |
| $\beta$ .AS4 | -0.13088 | 0.57174 | 0.52524  | 0.01448 | 0.04125  | 0.8591  | 0.63782  | 0.00187 | 0.27979  | 0.21932 | 0.15806  |
| $\beta$ .AS5 | -0.17172 | 0.45671 | 0.06166  | 0.79062 | -0.09817 | 0.67203 | 0.23073  | 0.31429 | 0.0686   | 0.76765 | -0.1063  |
| DDS1         | 0.97618  | 0       | -0.10974 | 0.63583 | 0.71541  | 0.00027 | 0.15306  | 0.50773 | 0.15462  | 0.50337 | 0.40681  |
| DDS2         | 0.94813  | 0       | -0.04218 | 0.85595 | 0.69126  | 0.00052 | 0.18274  | 0.42785 | 0.25938  | 0.2562  | 0.44514  |
| DDS3         | -0.14553 | 0.52906 | -0.34132 | 0.12996 | -0.17728 | 0.44202 | -0.09342 | 0.6871  | -0.3522  | 0.1174  | -0.3636  |
| LAS1         | -0.13135 | 0.57037 | -0.24132 | 0.29197 | -0.10918 | 0.63758 | -0.08195 | 0.72397 | -0.30266 | 0.18235 | -0.3226  |
| LAS2         | -0.22772 | 0.32083 | 0.1766   | 0.44382 | -0.18893 | 0.4121  | 0.12247  | 0.5969  | 0.27452  | 0.22848 | -0.06436 |
| CAS1         | 0.34467  | 0.126   | -0.18214 | 0.4294  | 0.27711  | 0.22394 | 0.53625  | 0.01221 | -0.17614 | 0.44501 | 0.01263  |
| CAS2         | -0.25929 | 0.25637 | 0.00955  | 0.96722 | -0.17351 | 0.45196 | 0.5573   | 0.00868 | 0.01057  | 0.96372 | -0.27017 |
| CAS3         | 0.0026   | 0.99109 | 0.00645  | 0.97785 | 0.02668  | 0.9086  | 0.6314   | 0.00214 | -0.13455 | 0.56091 | -0.03565 |
| PPDS1        | 0.97672  | 0       | -0.1214  | 0.60014 | 0.75154  | 0.00009 | 0.17944  | 0.4364  | 0.07953  | 0.73185 | 0.4016   |
| PPDS2        | 0.97221  | 0       | -0.11372 | 0.62354 | 0.76157  | 0.00006 | 0.19012  | 0.4091  | 0.08197  | 0.72392 | 0.41394  |
| PPTS1        | -0.05173 | 0.82378 | 0.04543  | 0.84498 | -0.00952 | 0.96735 | 0.65588  | 0.00125 | -0.0818  | 0.72447 | -0.25819 |
| PPTS2        | -0.29353 | 0.19656 | 0.09737  | 0.67458 | -0.11023 | 0.6343  | 0.35561  | 0.11364 | -0.09131 | 0.69385 | -0.13278 |
| OAS1         | -0.00183 | 0.99371 | -0.08806 | 0.70425 | 0.49585  | 0.02226 | 0.14777  | 0.52267 | -0.45975 | 0.036   | 0.47696  |
| OAS2         | 0.83095  | 0       | -0.16554 | 0.47329 | 0.78587  | 0.00002 | 0.19379  | 0.39995 | -0.10028 | 0.6654  | 0.42056  |

|             |          |         |          |         |          |         |          |         |          |         |          |
|-------------|----------|---------|----------|---------|----------|---------|----------|---------|----------|---------|----------|
| OAS3        | -0.11002 | 0.63495 | 0.0976   | 0.67383 | 0.18404  | 0.42453 | 0.74747  | 0.0001  | -0.07939 | 0.7323  | 0.02493  |
| DXS1        | 0.98679  | 0       | -0.14204 | 0.53909 | 0.72148  | 0.00022 | 0.14101  | 0.54208 | 0.09959  | 0.66756 | 0.37968  |
| DXS2        | 0.11461  | 0.62081 | 0.5811   | 0.00573 | -0.10505 | 0.65041 | -0.13913 | 0.54753 | 0.72876  | 0.00018 | 0.19008  |
| DXS3        | -0.11963 | 0.60552 | -0.05621 | 0.80877 | -0.42126 | 0.05719 | -0.2513  | 0.27183 | 0.40679  | 0.06724 | -0.09203 |
| DXS4        | -0.22256 | 0.3322  | -0.11959 | 0.60564 | 0.20277  | 0.37805 | 0.05723  | 0.80538 | -0.47828 | 0.0283  | 0.11993  |
| DXS5        | -0.18648 | 0.41831 | -0.10646 | 0.64602 | 0.11923  | 0.6067  | -0.13347 | 0.56409 | -0.40747 | 0.06674 | 0.16894  |
| DXS6        | -0.20908 | 0.36306 | 0.1989   | 0.38739 | -0.16657 | 0.4705  | 0.42693  | 0.05359 | -0.15262 | 0.50897 | -0.04648 |
| DXS7        | -0.18324 | 0.42658 | -0.10829 | 0.64034 | -0.01762 | 0.93958 | 0.33954  | 0.13211 | -0.37901 | 0.09019 | -0.25502 |
| DXS8        | -0.09905 | 0.66928 | -0.06697 | 0.77303 | -0.2513  | 0.27184 | 0.00612  | 0.979   | 0.29943  | 0.18729 | -0.12889 |
| DXS9        | -0.19552 | 0.39567 | 0.09503  | 0.68199 | -0.11485 | 0.62009 | 0.12845  | 0.57898 | 0.31809  | 0.15996 | 0.04593  |
| DXR1        | 0.6009   | 0.00397 | 0.15243  | 0.5095  | 0.25455  | 0.26549 | 0.0009   | 0.99689 | 0.42617  | 0.05406 | 0.23479  |
| DXR2        | 0.77856  | 0.00003 | 0.1296   | 0.57555 | 0.42663  | 0.05377 | 0.03806  | 0.86991 | 0.4953   | 0.02243 | 0.36911  |
| DXR3        | 0.43579  | 0.04829 | -0.17668 | 0.44361 | 0.58453  | 0.00539 | 0.46206  | 0.03496 | -0.20314 | 0.37714 | 0.08741  |
| DXR4        | -0.09532 | 0.68107 | 0.19505  | 0.39685 | 0.44288  | 0.04436 | 0.04002  | 0.86324 | -0.28567 | 0.20937 | 0.30592  |
| IspD1       | 0.0145   | 0.95026 | -0.07803 | 0.73671 | -0.19793 | 0.38976 | 0.37207  | 0.09673 | -0.01776 | 0.93908 | -0.40962 |
| IspD2       | -0.08174 | 0.72466 | 0.08678  | 0.70838 | -0.40109 | 0.07155 | -0.03674 | 0.87436 | 0.19069  | 0.40767 | -0.22365 |
| IspE1       | 0.26585  | 0.2441  | -0.25419 | 0.26618 | 0.08768  | 0.70549 | 0.1037   | 0.65463 | 0.1765   | 0.44406 | -0.16957 |
| IspE2       | -0.08078 | 0.72777 | 0.14573  | 0.52848 | -0.18488 | 0.42238 | -0.35547 | 0.11379 | 0.27694  | 0.22424 | 0.14221  |
| IspF1       | 0.5638   | 0.00777 | 0.27159  | 0.23369 | 0.53915  | 0.01166 | -0.15281 | 0.50844 | 0.3521   | 0.11751 | 0.71463  |
| IspF2       | 0.54933  | 0.0099  | 0.25879  | 0.25732 | 0.50236  | 0.0203  | -0.15446 | 0.5038  | 0.40539  | 0.06828 | 0.61515  |
| IspF3       | -0.04166 | 0.85769 | 0.34923  | 0.12074 | 0.11732  | 0.61252 | -0.30988 | 0.17162 | 0.24328  | 0.28793 | 0.41224  |
| IspF4       | -0.05563 | 0.81071 | 0.25842  | 0.25803 | -0.2384  | 0.29801 | -0.26381 | 0.24787 | 0.55649  | 0.00879 | 0.05019  |
| IspF5       | -0.11702 | 0.61344 | 0.10533  | 0.64953 | -0.21591 | 0.34723 | -0.32713 | 0.14776 | 0.50223  | 0.02033 | 0.08142  |
| IspG. gcpE1 | 0.37411  | 0.09477 | 0.081    | 0.72707 | 0.08728  | 0.70677 | 0.01189  | 0.95921 | 0.77043  | 0.00004 | 0.25393  |
| IspG. gcpE2 | 0.43695  | 0.04764 | 0.22622  | 0.3241  | 0.1715   | 0.45728 | 0.04673  | 0.8406  | 0.77402  | 0.00004 | 0.30298  |
| IspG. gcpE3 | 0.43962  | 0.04614 | 0.00114  | 0.9961  | 0.22864  | 0.31881 | 0.22654  | 0.32341 | 0.54202  | 0.01114 | 0.19201  |
| IspG. gcpE4 | -0.1796  | 0.43599 | 0.36568  | 0.10306 | -0.35153 | 0.11814 | 0.27886  | 0.22092 | 0.64182  | 0.00171 | -0.10302 |
| IspH1       | 0.89373  | 0       | 0.13214  | 0.56802 | 0.64542  | 0.00158 | 0.16597  | 0.47213 | 0.45318  | 0.0391  | 0.44205  |
| IspH2       | 0.47659  | 0.02894 | -0.1087  | 0.63905 | 0.29299  | 0.19742 | 0.32747  | 0.14732 | 0.14087  | 0.54248 | -0.00082 |

|       |          |         |          |         |          |         |          |         |          |         |          |
|-------|----------|---------|----------|---------|----------|---------|----------|---------|----------|---------|----------|
| IspH3 | -0.2056  | 0.37128 | -0.19032 | 0.4086  | -0.06266 | 0.7873  | 0.32577  | 0.14955 | -0.25234 | 0.2698  | -0.36504 |
| IspH4 | -0.21637 | 0.34617 | 0.09805  | 0.67243 | -0.28032 | 0.21841 | 0.35159  | 0.11808 | 0.4376   | 0.04727 | -0.20231 |
| IspH5 | -0.15231 | 0.50983 | 0.13356  | 0.56382 | 0.06221  | 0.7888  | -0.25132 | 0.27179 | -0.02392 | 0.91804 | 0.05592  |

**Table S8** Abbreviations.

| Abbreviation | Full name                                                                    |
|--------------|------------------------------------------------------------------------------|
| 2,4-D        | 2,4-Dichlorophenoxy acetic acid                                              |
| AACT         | Acetyl-CoA C-acetyltransferase                                               |
| ATbHLH       | <i>Arabidopsis thaliana</i> basic-helix-loop-helix type transcription factor |
| bHLH         | Basic-helix-loop-helix type transcription factor                             |
| Bl           | Bitter leaf                                                                  |
| Bt           | Bitter fruit                                                                 |
| CAS          | Cycloartenol synthase                                                        |
| CBF          | C-REPEAT/DRE binding factor                                                  |
| CDP-ME       | Methylerythritol cytidyl diphosphate;                                        |
| CDP-MEP      | 4-Diphosphocytidyl-2-C-methyl-D-erythritol-2-phosphate;                      |
| CDS          | Coding sequence                                                              |
| DDS          | Dammarenediol synthase                                                       |
| DEG          | Differentially expressed gene                                                |
| DMAPP        | Dimethylallyl diphosphate                                                    |
| DXR          | 1-Deoxy-D-xylulose-5-phosphate reductoisomerase                              |
| DXS          | 1-Deoxy-D-xylulose-5-phosphate synthas                                       |
| EST          | Expression sequences tags                                                    |
| FDR          | False discovery rate                                                         |
| FPP          | Farnesyl diphosphate                                                         |
| FPS          | Farnesyl diphosphate synthase                                                |
| FRKM         | Frangments per kilobase of exon per million mapped reads                     |
| GT           | Glycosyltransferase                                                          |
| HMBPP        | ( <i>E</i> )-4-Hydroxy-3-methyl-but-2-enyl pyrophosphate                     |



---

|          |                                                                       |
|----------|-----------------------------------------------------------------------|
| HMGCoA   | 3-Hydroxy-3-methylglutaryl-CoA                                        |
| HMGR     | 3-Hydroxy-3-methylglutaryl-CoA reductase                              |
| HMGS     | 3-Hydroxy-3-methylglutaryl- CoA synthase                              |
| ICE      | Inducer of CBF expression genes                                       |
| IDI      | Isopentenyl-diphosphate delta-isomerase                               |
| IPP      | Isopentenyl diphosphate                                               |
| IspD     | CDP-ME Synthetase;                                                    |
| IspE     | 4-Diphosphocytidyl-2-C-methyl-D-erythritol kinase;                    |
| IspF     | 2-C-Methyl-D-erythritol 2,4-cyclodiphosphate synthase;                |
| IspG     | (E)-4-Hydroxy-3-methylbut-2-enyl-diphosphate synthase;                |
| IspH     | 4-Hydroxy-3-methylbut-2-en-1-yl diphosphate reductase;                |
| JA       | Jasmonate acid                                                        |
| JTT      | The Jones, Taylor, and Thornton model                                 |
| KT       | Kinetin                                                               |
| LAS      | Lanosterol synthase                                                   |
| LTR      | Long terminal repeat                                                  |
| MEcPP    | 2-C-Methyl-D-erythritol-2,4-cyclodiphosphate;                         |
| MeJA     | Methyl jasmonate                                                      |
| MEP      | 2-C-Methyl-D-erythritol 4-phosphate                                   |
| MS media | Murashige and Skoog media                                             |
| MVA      | Mevalonic acid                                                        |
| MVD      | Mevalonate diphosphate decarboxylase                                  |
| MVK      | Mevalonate kinase                                                     |
| MVP      | Mevalonate phosphate                                                  |
| MVPP     | Diphosphomevalonate                                                   |
| OAS      | Oleanolic acid synthase                                               |
| ORF      | Open reading frame                                                    |
| PCR      | Polymerase chain reaction                                             |
| PGbHLH   | <i>Panax Ginseng</i> basic-Helix-Loop-Helix type transcription factor |

---

---

|             |                                                           |
|-------------|-----------------------------------------------------------|
| PMK         | Phosphomevalonate kinase                                  |
| PPD         | Protopanaxadiol                                           |
| PPDS        | Protopanaxadiol synthase                                  |
| PPT         | Protopanaxatriol                                          |
| PPTS        | Protopanaxatriol synthase                                 |
| SE          | Squalene epoxidase                                        |
| SQS         | Squalene synthase                                         |
| SS          | Squalene synthase                                         |
| TSAR        | Triterpene Saponin biosynthesis activating regulator      |
| TSARL       | Triterpene Saponin biosynthesis activating regulator-like |
| $\beta$ -AS | $\beta$ -Amyrin synthase                                  |

---

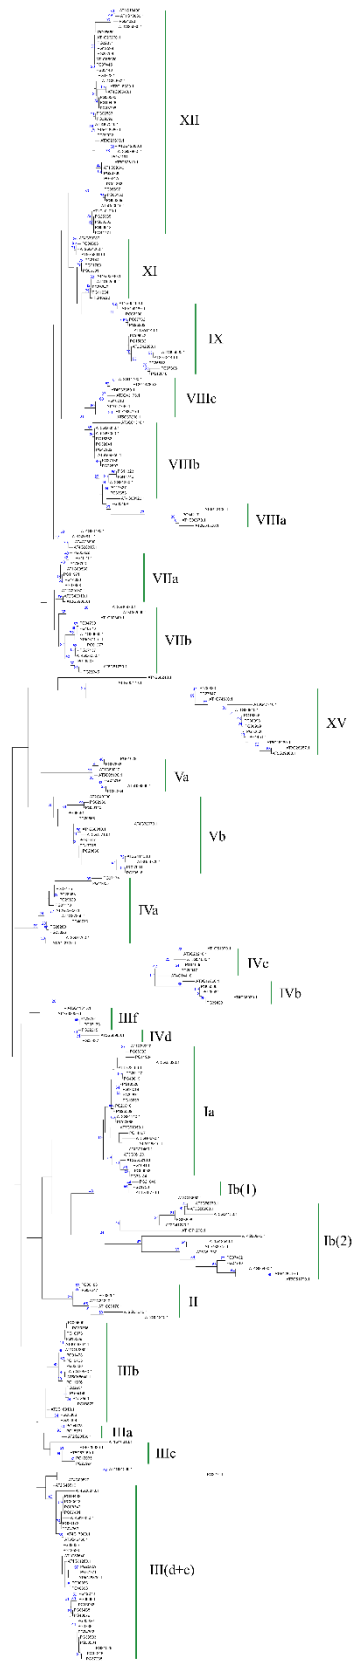

**Figure S1** Unrooted phylogenetic tree of 296 proteins from *P. ginseng* and *A. thaliana* and their respective bHLH subfamilies. Only the bHLH domains were used for phylogenetic tree

construction. The JTT model was selected as the best-fitting amino acid substitution model with an estimated proportion of invariable sites (I) and an estimated g-distribution parameter (G). The phylogenetic tree was constructed using the neighbour-joining method with 1000 bootstrap replicates and Poisson correction distance. Roman numerals correspond to the bHLH subfamily.

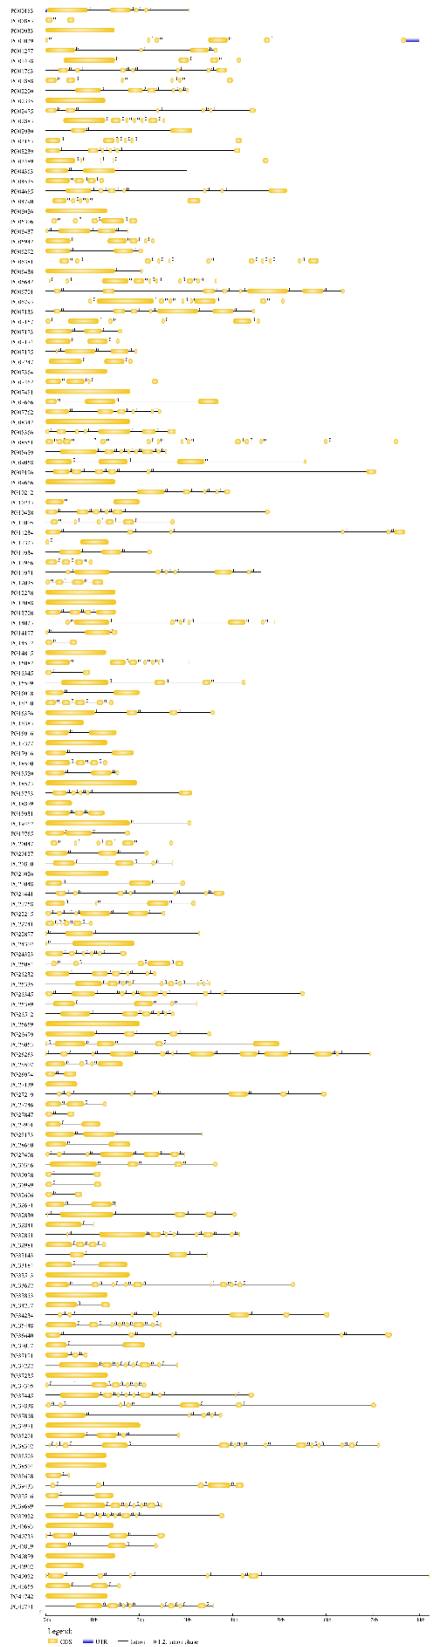

**Figure S2** The structural features of 169 PGbHLHs. The exons and UTRs are represented by yellow and blue round-cornered rectangles, respectively, with black connecting lines as the introns. The numbers above the rectangles correspond to the intron phase.

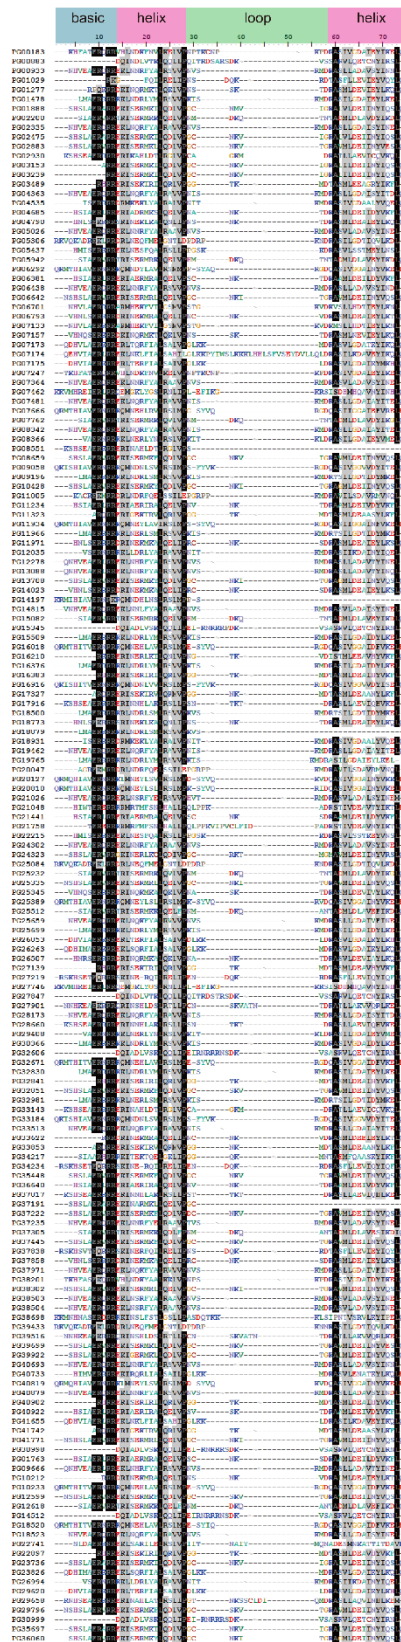

**Figure S3** Multiple alignment of the key domain of 169 PGbHLHs. Alignment of the bHLH domain of 169 PGbHLHs. The shaded boxes above indicate the positions of the DNA-binding basic region, the two  $\alpha$ -helices, and the variable loop region.

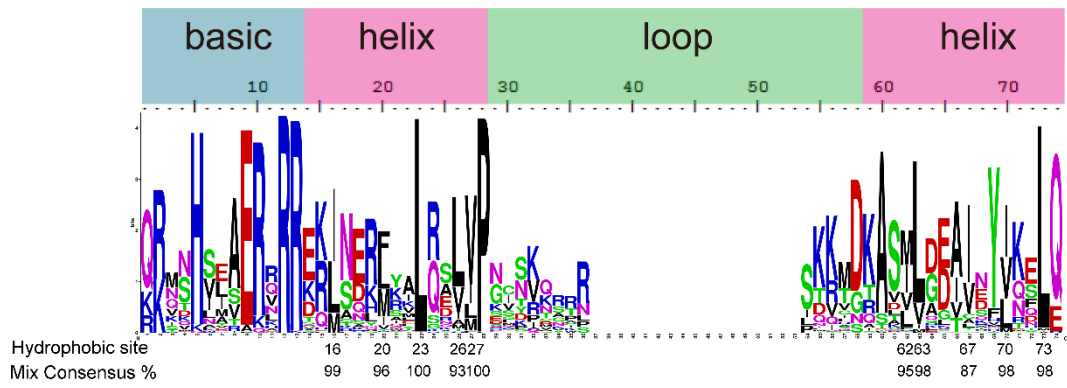

**Figure S4** The conserved hydrophobic amino acids residues in the two-helices region of the PgbHLH bHLH domain. The overall height of each stack represents the conservation of the sequence at that position. The numbering of the amino acid follows.

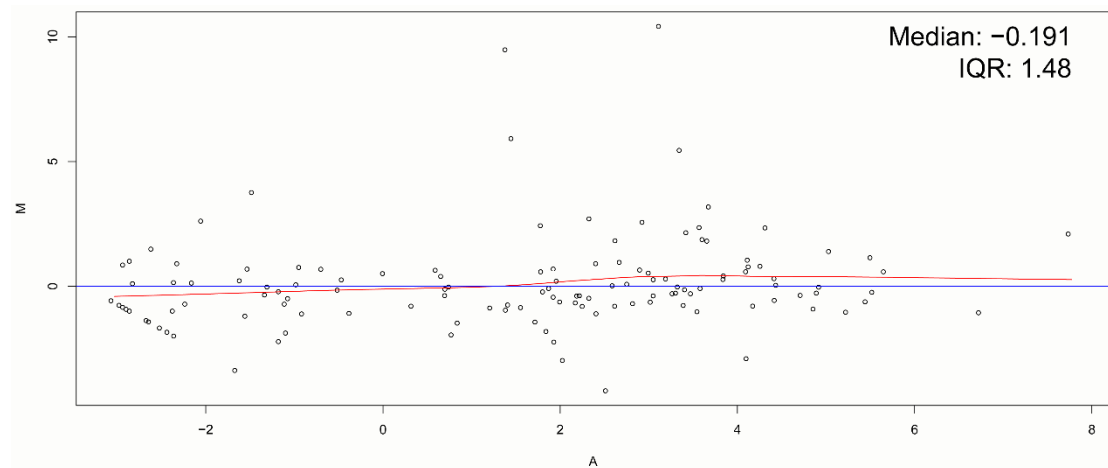

**Figure S5** MA-plot of 169 PgbHLHs for methyl jasmonate treatment analysis
